# Supplementary material for: Tandem catalysis enables chlorine-containing waste as chlorination reagents
Source: Springer Nature journal article supplement (doi:10.1038/s41557-024-01462-8), 2024-02-23
Supplement: MOESM1 [file 41557_2024_1462_MOESM1_ESM.pdf]

# Tandem catalysis enables chlorine-containing waste as chlorination reagents

In the format provided by the  
authors and unedited

## Contents

|                                             |     |
|---------------------------------------------|-----|
| Materials and Methods .....                 | 2   |
| Materials .....                             | 2   |
| Typical reaction (standard condition) ..... | 2   |
| Substrate preparation .....                 | 8   |
| Analytical Methods .....                    | 10  |
| Supplementary Figures .....                 | 11  |
| Life cycle assessment (LCA) .....           | 33  |
| Methods .....                               | 33  |
| Assumptions .....                           | 33  |
| NMR spectra .....                           | 37  |
| Substrate .....                             | 37  |
| Product .....                               | 67  |
| References .....                            | 108 |

## Materials and Methods

### Materials

Inorganic salts including Cu salts, Pd salts and nitrates, solvents, alkyl chlorides and arene (if not specified) were purchased from Sigma-Aldrich and used directly unless specified otherwise. Pure polymers including polyvinylidene chloride (PVDC)  $M_w \sim 50,000/100,000/250,000$ , polychloroprene (chloroprene rubber, CR), polyepichlorohydrin (PECH)  $M_w \sim 700,000$ , poly(epichlorohydrin-co-ethylene oxide) (PECHEO, epichlorohydrin 64-69 wt.%) and poly(epichlorohydrin-co- $\text{CO}_2$ ) (PECHC) were purchased from Sigma-Aldrich. Compressed air,  $\text{N}_2$  and  $\text{O}_2$  was purchased from Carbogas. PVC or neoprene-based water pipe, electrical conduit, electric wire and vacuum tube were obtained from the chemical store at EPFL. PVDC blisters (Ibuprofen N Zentiva) was purchased from SUN STORE Pharmacies in Lausanne.

### Typical reaction (standard condition)

Typical reaction using PVC water pipe as the chlorination reagent:

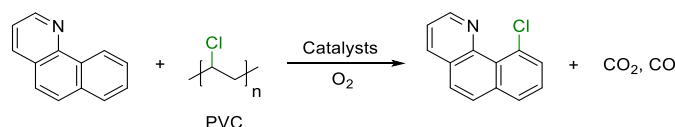

7,8-Benzoquinoline **1a** (0.25 mmol), PVC water pipe (1.5 equiv., 0.375 mmol),  $\text{Cu}(\text{NO}_3)_2 \cdot 3\text{H}_2\text{O}$  (20%, 0.05 mmol), PdO (5%, 0.0125 mmol),  $\text{NaNO}_3$  (20%, 0.05 mmol), biphenyl (0.2 mmol, internal standard) and DMSO (2 mL) were added into glass insert vial of autoclave and charged with  $\text{O}_2$  (3 bar). The reactor was heated to  $140^\circ\text{C}$  for 15 h. After cooling to room temperature, the gas products were collected with a Tedlar® gas sampling bag (Sigma-Aldrich) for analysis by gas chromatography (GC). Ethyl acetate (EA,  $3 \times 3$  mL) and an aqueous saturated brine solution (5 mL) was added to the reaction mixture to extract the organic products. The combined organic phase was used for analysis. Further purification was achieved using silica gel chromatography (Hexane/ethyl acetate as eluent if not specified) when required.

Process mass intensity (PMI) = Total mass in process / Mass of products =  $[\text{M}(\text{substrate}) + \text{M}(\text{PVC}) + \text{M}(\text{Cu}(\text{NO}_3)_2 \cdot 3\text{H}_2\text{O}) + \text{M}(\text{PdO}) + \text{M}(\text{NaNO}_3) + \text{M}(\text{O}_2)] / [\text{M}(\text{product}) + \text{M}(\text{CO})]$

Environmental factor (E-factor) = Mass of waste / Mass of products =  $[\text{M}(\text{substrate}) + \text{M}(\text{PVC}) + \text{M}(\text{Cu}(\text{NO}_3)_2 \cdot 3\text{H}_2\text{O}) + \text{M}(\text{PdO}) + \text{M}(\text{NaNO}_3) + \text{M}(\text{O}_2) - \text{M}(\text{product}) - \text{M}(\text{CO})] / [\text{M}(\text{product}) + \text{M}(\text{CO})]$

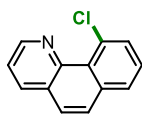

### **1b**, 10-Chlorobenzoquinoline

$^1\text{H}$  NMR (400 MHz, DMSO)  $\delta$  9.07 (dd,  $J = 4.3, 1.9$  Hz, 1H), 8.46 (dd,  $J = 8.0, 1.9$  Hz, 1H), 8.07 (dd,  $J = 7.9, 1.4$  Hz, 1H), 8.01 (d,  $J = 8.8$  Hz, 1H), 7.95 (d,  $J = 8.8$  Hz, 1H), 7.87 (dd,  $J = 7.7, 1.3$  Hz, 1H), 7.77 – 7.66 (m, 2H).  $^{13}\text{C}$  NMR (101 MHz, DMSO)  $\delta$  148.31, 145.85, 136.59, 136.53, 131.83, 131.51, 128.64, 128.50, 127.76, 127.48, 126.97, 122.76.

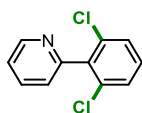

### **2b**, 2-(2,6-dichlorophenyl)pyridine

## Supplementary Information

$^1\text{H}$  NMR (400 MHz, DMSO)  $\delta$  8.73 – 8.68 (m, 1H), 7.94 (t,  $J$  = 7.7 Hz, 1H), 7.59 (d,  $J$  = 8.1 Hz, 2H), 7.46 (dt,  $J$  = 17.0, 8.3 Hz, 3H).  $^{13}\text{C}$  NMR (101 MHz, DMSO)  $\delta$  155.29, 149.96, 138.66, 137.32, 134.07, 131.23, 128.82, 125.31, 123.86.

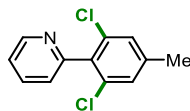

### 3b, 2-(2,6-dichloro-4-methylphenyl)pyridine

$^1\text{H}$  NMR (400 MHz, DMSO)  $\delta$  8.70 (m,  $J$  = 4.9, 1.8, 1.0 Hz, 1H), 7.91 (td,  $J$  = 7.7, 1.8 Hz, 1H), 7.47 – 7.34 (m, 4H), 2.35 (d,  $J$  = 0.9 Hz, 3H).  $^{13}\text{C}$  NMR (101 MHz, DMSO)  $\delta$  155.35, 149.91, 141.48, 137.15, 135.81, 133.65, 129.13, 125.45, 123.67, 20.65.

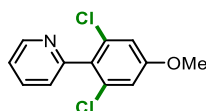

### 4b, 2-(2,6-dichloro-4-methoxyphenyl)pyridine

$^1\text{H}$  NMR (400 MHz, DMSO)  $\delta$  8.68 (dt,  $J$  = 4.8, 1.4 Hz, 1H), 7.91 (td,  $J$  = 7.7, 1.9 Hz, 1H), 7.47 – 7.35 (m, 2H), 7.19 (s, 2H), 3.85 (s, 3H).  $^{13}\text{C}$  NMR (101 MHz, DMSO)  $\delta$  160.08, 155.22, 149.89, 137.19, 134.56, 131.19, 125.84, 123.65, 114.63, 56.62.

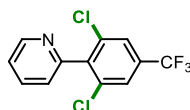

### 5b, 2-(2,6-dichloro-4-(trifluoromethyl)phenyl)pyridine

$^1\text{H}$  NMR (400 MHz, DMSO)  $\delta$  8.74 (m,  $J$  = 4.8, 1.8, 1.1 Hz, 1H), 8.03 (d,  $J$  = 0.8 Hz, 2H), 7.98 (td,  $J$  = 7.7, 1.8 Hz, 1H), 7.49 (m,  $J$  = 7.7, 5.6, 1.1 Hz, 2H).  $^{13}\text{C}$  NMR (101 MHz, DMSO)  $\delta$  154.24, 150.17, 142.50, 137.53, 135.34, 132.08, 131.74, 131.41, 131.08, 127.06, 125.82, 125.78, 125.75, 125.71, 125.03, 124.34, 124.27, 121.63, 118.91.

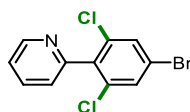

### 6b, 2-(2,6-dichloro-4-bromophenyl)pyridine

$^1\text{H}$  NMR (400 MHz, DMSO)  $\delta$  8.71 (m,  $J$  = 4.9, 1.9, 1.0 Hz, 1H), 7.95 (td,  $J$  = 7.7, 1.8 Hz, 1H), 7.91 (s, 2H), 7.51 – 7.40 (m, 2H).  $^{13}\text{C}$  NMR (101 MHz, DMSO)  $\delta$  154.48, 150.10, 138.03, 137.45, 135.09, 131.27, 125.32, 124.09, 122.46.

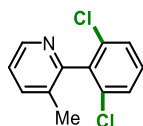

### 7b, 2-(2,6-dichloro-phenyl)-3-methyl-pyridine

$^1\text{H}$  NMR (400 MHz, DMSO)  $\delta$  8.52 (m,  $J$  = 4.8, 1.6, 0.7 Hz, 1H), 7.80 (m,  $J$  = 7.7, 1.7, 0.9 Hz, 1H), 7.62 (dd,  $J$  = 8.0, 0.8 Hz, 2H), 7.50 (dd,  $J$  = 8.8, 7.3 Hz, 1H), 7.39 (dd,  $J$  = 7.8, 4.8 Hz, 1H), 2.03 (s, 3H).  $^{13}\text{C}$  NMR (101 MHz, DMSO)  $\delta$  154.91, 147.55, 138.41, 137.99, 133.91, 132.09, 131.24, 128.81, 124.12, 18.05.

## Supplementary Information

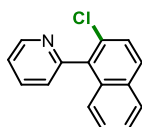

### 8b, 2-(2-chloronaphthalen-1-yl)pyridine

$^1\text{H}$  NMR (400 MHz,  $\text{CDCl}_3$ )  $\delta$  8.76 (m,  $J = 4.9, 1.8, 1.0$  Hz, 2H), 7.79 (m,  $J = 8.5, 6.9, 4.9$  Hz, 6H), 7.48 (d,  $J = 8.8$  Hz, 2H), 7.45 – 7.24 (m, 10H).  $^{13}\text{C}$  NMR (101 MHz,  $\text{CDCl}_3$ )  $\delta$  156.66, 149.83, 136.41, 136.10, 133.24, 132.12, 130.70, 129.76, 128.04, 127.18, 126.01, 125.69, 122.67,

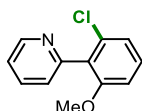

### 9b, 2-(2-chloro-6-methoxyphenyl)pyridine

$^1\text{H}$  NMR (400 MHz,  $\text{CDCl}_3$ )  $\delta$  8.65 (m,  $J = 4.9, 1.8, 1.0$  Hz, 1H), 7.67 (td,  $J = 7.7, 1.8$  Hz, 1H), 7.27 – 7.16 (m, 3H), 7.01 (dd,  $J = 8.1, 1.0$  Hz, 1H), 6.81 (dd,  $J = 8.4, 1.0$  Hz, 1H), 3.64 (s, 3H).  $^{13}\text{C}$  NMR (101 MHz,  $\text{CDCl}_3$ )  $\delta$  158.25, 154.97, 149.47, 136.05, 134.13, 129.79, 129.20, 125.67, 122.36, 121.82, 109.53, 77.31, 56.11.

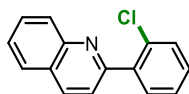

### 10b, 3-(2-chlorophenyl)isoquinoline

$^1\text{H}$  NMR (400 MHz,  $\text{CDCl}_3$ )  $\delta$  8.19 – 8.07 (m, 2H), 7.81 (dd,  $J = 8.0, 1.5$  Hz, 1H), 7.72 – 7.64 (m, 2H), 7.66 – 7.58 (m, 1H), 7.51 (m,  $J = 8.2, 6.9, 1.2$  Hz, 1H), 7.44 (dd,  $J = 7.2, 2.0$  Hz, 1H), 7.33 (pd,  $J = 7.4, 1.8$  Hz, 2H).  $^{13}\text{C}$  NMR (101 MHz,  $\text{CDCl}_3$ )  $\delta$  157.45, 148.11, 139.70, 135.67, 132.39, 131.71, 130.11, 129.89, 129.72, 129.69, 127.57, 127.19, 127.15, 126.79, 122.79, 77.23.

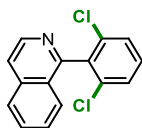

### 11b, 1-(2,6-dichlorophenyl)isoquinoline

$^1\text{H}$  NMR (400 MHz,  $\text{CDCl}_3$ )  $\delta$  8.61 (d,  $J = 5.7$  Hz, 1H), 7.86 (dt,  $J = 8.3, 1.1$  Hz, 1H), 7.72 – 7.59 (m, 2H), 7.51 – 7.38 (m, 4H), 7.32 (dd,  $J = 8.9, 7.2$  Hz, 1H).  $^{13}\text{C}$  NMR (101 MHz,  $\text{CDCl}_3$ )  $\delta$  156.70, 142.49, 136.96, 136.36, 135.20, 130.45, 130.24, 128.18, 127.80, 127.16, 126.04, 121.01, 77.23.

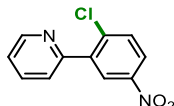

### 12b, 2-(2-chloro-5-nitrophenyl)pyridine

$^1\text{H}$  NMR (500 MHz,  $\text{CDCl}_3$ )  $\delta$  8.79 (dd,  $J = 4.3, 2.6$  Hz, 1H), 8.54 (d,  $J = 2.7$  Hz, 1H), 8.22 (dt,  $J = 8.8, 1.8$  Hz, 1H), 7.86 (td,  $J = 7.7, 1.8$  Hz, 1H), 7.75 – 7.70 (m, 1H), 7.68 (d,  $J = 8.7$  Hz, 1H), 7.40 (m,  $J = 7.6, 5.0, 1.3$  Hz, 1H).  $^{13}\text{C}$  NMR (126 MHz,  $\text{CDCl}_3$ )  $\delta$  154.60, 150.03, 146.74, 140.45, 139.09, 136.34, 131.22, 126.78, 124.73, 124.08, 123.40.

## Supplementary Information

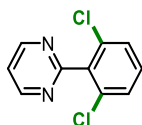

### 13b, 2-(2,6-dichlorophenyl)pyrimidine

$^1\text{H}$  NMR (400 MHz, DMSO)  $\delta$  9.01 (d,  $J = 5.0$  Hz, 2H), 7.66 – 7.59 (m, 3H), 7.54 (dd,  $J = 9.0, 7.1$  Hz, 1H).

$^{13}\text{C}$  NMR (101 MHz, DMSO)  $\delta$  163.64, 158.35, 137.82, 133.32, 131.65, 128.78, 121.38.

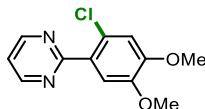

### 14b, 2-(2-chloro-4,5-dimethoxyphenyl)pyrimidine

$^1\text{H}$  NMR (400 MHz,  $\text{CDCl}_3$ )  $\delta$  8.89 (d,  $J = 4.9$  Hz, 2H), 7.39 (s, 1H), 7.28 (t,  $J = 4.9$  Hz, 1H), 7.01 (s, 1H), 3.96 (d,  $J = 1.8$  Hz, 6H).  $^{13}\text{C}$  NMR (101 MHz,  $\text{CDCl}_3$ )  $\delta$  165.34, 157.23, 157.01, 150.39, 147.83, 129.50, 124.69, 118.95, 114.06, 113.52, 77.23, 56.28, 56.18.

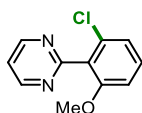

### 15b, 2-(2-chloro-6-methoxyphenyl)pyrimidine

$^1\text{H}$  NMR (400 MHz,  $\text{CDCl}_3$ )  $\delta$  8.83 (d,  $J = 4.9$  Hz, 2H), 7.30 – 7.17 (m, 2H), 7.02 (dd,  $J = 8.1, 0.9$  Hz, 1H), 6.84 (dd,  $J = 8.4, 0.9$  Hz, 1H), 3.68 (s, 3H).  $^{13}\text{C}$  NMR (101 MHz,  $\text{CDCl}_3$ )  $\delta$  164.23, 158.11, 157.31, 133.54, 130.30, 128.29, 121.77, 119.55, 109.60, 77.23, 56.16.

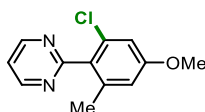

### 16b, 2-(2-chloro-4-methoxy-6-methylphenyl)pyrimidine

$^1\text{H}$  NMR (400 MHz,  $\text{CDCl}_3$ )  $\delta$  8.80 (d,  $J = 4.9$  Hz, 2H), 7.21 (t,  $J = 4.9$  Hz, 1H), 6.79 (d,  $J = 2.5$  Hz, 1H), 6.66 (dd,  $J = 2.4, 0.9$  Hz, 1H), 3.74 (s, 3H), 2.03 (s, 3H).  $^{13}\text{C}$  NMR (101 MHz,  $\text{CDCl}_3$ )  $\delta$  166.22, 159.75, 157.24, 139.05, 133.27, 131.14, 119.27, 114.77, 112.23, 55.52, 20.34.

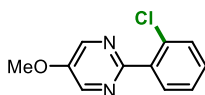

### 17b, 2-(2-chlorophenyl)-5-methoxypyrimidine

$^1\text{H}$  NMR (500 MHz,  $\text{CDCl}_3$ )  $\delta$  8.56 (s, 3H), 7.72 (dd,  $J = 6.1, 3.4$  Hz, 2H), 7.55 – 7.48 (m, 2H), 7.45 – 7.28 (m, 4H), 4.01 (s, 5H).  $^{13}\text{C}$  NMR (126 MHz,  $\text{CDCl}_3$ )  $\delta$  158.22, 151.90, 143.53, 143.20, 137.44, 132.63, 131.55, 130.51, 130.03, 128.08, 126.79, 56.03.

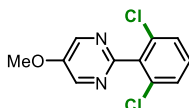

### 17b', 2-(2,6-dichlorophenyl)-5-methoxypyrimidine

$^1\text{H}$  NMR (500 MHz,  $\text{CDCl}_3$ )  $\delta$  8.58 (s, 2H), 7.42 (d,  $J = 8.0$  Hz, 2H), 7.30 (dd,  $J = 14.8, 6.5$  Hz, 1H), 4.02 (s, 3H).  $^{13}\text{C}$  NMR (126 MHz,  $\text{CDCl}_3$ )  $\delta$  156.51, 152.19, 143.52, 137.29, 134.49, 130.12, 128.08, 56.03.

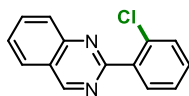

**18b**, 2-(2-chlorophenyl)quinazoline

$^1\text{H}$  NMR (500 MHz,  $\text{CDCl}_3$ )  $\delta$  9.58 (d,  $J = 16.0$  Hz, 1H), 8.16 (d,  $J = 8.2$  Hz, 1H), 8.09 – 7.96 (m, 3H), 7.89 – 7.82 (m, 1H), 7.82 – 7.70 (m, 1H), 7.60 – 7.53 (m, 1H), 7.50 – 7.33 (m, 3H).  $^{13}\text{C}$  NMR (126 MHz,  $\text{CDCl}_3$ )  $\delta$  162.02, 160.29, 150.38, 138.30, 134.64, 134.44, 132.92, 131.81, 130.58, 130.36, 130.25, 128.71, 128.68, 128.54, 128.19, 128.11, 127.31, 127.19, 126.93, 123.31.

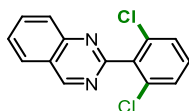

**18b'**, 2-(2,6-dichlorophenyl)quinazoline

$^1\text{H}$  NMR (500 MHz,  $\text{CDCl}_3$ )  $\delta$  9.59 (s, 1H), 8.18 (d,  $J = 8.5$  Hz, 1H), 8.09 – 7.99 (m, 2H), 7.78 (m,  $J = 8.1$ , 6.9, 1.1 Hz, 1H), 7.47 (d,  $J = 8.1$  Hz, 2H), 7.36 (dd,  $J = 8.7$ , 7.5 Hz, 1H).  $^{13}\text{C}$  NMR (126 MHz,  $\text{CDCl}_3$ )  $\delta$  160.86, 160.38, 150.35, 137.90, 134.64, 134.26, 130.25, 128.71, 128.53, 128.19, 127.30, 123.61.

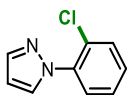

**19b**, 1-(2-chlorophenyl)-1H-pyrazole

$^1\text{H}$  NMR (400 MHz,  $\text{CDCl}_3$ )  $\delta$  7.81 (d,  $J = 2.4$  Hz, 3H), 7.68 (d,  $J = 1.9$  Hz, 3H), 7.56 – 7.47 (m, 3H), 7.47 – 7.35 (m, 3H), 7.35 – 7.21 (m, 6H), 6.47 – 6.37 (m, 3H).  $^{13}\text{C}$  NMR (101 MHz,  $\text{CDCl}_3$ )  $\delta$  140.93, 131.30, 130.66, 130.63, 129.00, 128.68, 128.37, 127.82, 127.67, 106.69, 106.66.

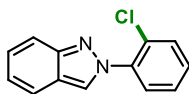

**20b**, 2-(2-chlorophenyl)-2H-indazole

$^1\text{H}$  NMR (400 MHz,  $\text{CDCl}_3$ )  $\delta$  8.27 (d,  $J = 1.0$  Hz, 1H), 7.76 – 7.58 (m, 3H), 7.57 – 7.46 (m, 1H), 7.44 – 7.24 (m, 3H), 7.07 (m,  $J = 8.5$ , 6.6, 0.9 Hz, 1H).  $^{13}\text{C}$  NMR (101 MHz,  $\text{CDCl}_3$ )  $\delta$  149.43, 138.64, 130.70, 129.97, 129.00, 128.59, 127.71, 126.95, 125.23, 122.45, 122.02, 120.53, 117.95, 77.23.

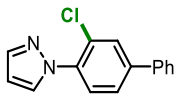

**21b**, 1-(3-chloro-[1,1'-biphenyl]-4-yl)-1H-pyrazole

$^1\text{H}$  NMR (400 MHz,  $\text{CDCl}_3$ )  $\delta$  7.86 (dd,  $J = 2.4$ , 0.6 Hz, 1H), 7.69 (dd,  $J = 11.4$ , 1.9 Hz, 2H), 7.63 – 7.48 (m, 4H), 7.46 – 7.29 (m, 3H), 6.43 (dd,  $J = 2.5$ , 1.9 Hz, 1H).  $^{13}\text{C}$  NMR (101 MHz,  $\text{CDCl}_3$ )  $\delta$  142.22, 141.01, 138.79, 137.13, 131.32, 129.11, 129.06, 128.40, 128.27, 127.92, 127.12, 126.30, 106.75, 77.23.

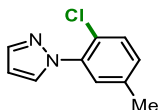

**22b**, 1-(2-chloro-5-methylphenyl)-1H-pyrazole

$^1\text{H}$  NMR (400 MHz,  $\text{CDCl}_3$ )  $\delta$  7.90 (d,  $J = 2.5$  Hz, 1H), 7.76 (d,  $J = 1.8$  Hz, 1H), 7.46 – 7.38 (m, 2H), 7.16 (dd,  $J = 8.4$ , 2.2 Hz, 1H), 6.49 (t,  $J = 2.2$  Hz, 1H), 2.40 (s, 3H).  $^{13}\text{C}$  NMR (101 MHz,  $\text{CDCl}_3$ )  $\delta$  140.79, 138.01, 137.79, 131.29, 130.27, 129.72, 128.26, 124.97, 106.55, 77.23, 20.77.

## Supplementary Information

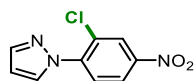

### 23b, 1-(2-chloro-4-nitrophenyl)-1H-pyrazole

$^1\text{H}$  NMR (500 MHz,  $\text{CDCl}_3$ )  $\delta$  8.69 (d,  $J = 2.5$  Hz, 3H), 8.55 (dd,  $J = 9.1, 2.5$  Hz, 3H), 8.42 (d,  $J = 2.7$  Hz, 3H), 8.15 (d,  $J = 9.1$  Hz, 3H), 7.92 (d,  $J = 1.7$  Hz, 3H), 6.67 (t,  $J = 2.1$  Hz, 3H), 1.37 – 1.26 (m, 2H), 0.93 – 0.83 (m, 1H).  $^{13}\text{C}$  NMR (126 MHz,  $\text{CDCl}_3$ )  $\delta$  145.64, 145.05, 143.91, 130.42, 129.60, 128.88, 124.21, 115.54, 110.33, 104.28.

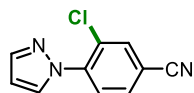

### 24b, 3-chloro-4-(1H-pyrazol-1-yl)benzonitrile

$^1\text{H}$  NMR (400 MHz,  $\text{CDCl}_3$ )  $\delta$  8.01 (dd,  $J = 2.6, 0.6$  Hz, 1H), 7.80 – 7.70 (m, 3H), 7.61 (dd,  $J = 8.4, 1.8$  Hz, 1H), 6.47 (dd,  $J = 2.6, 1.8$  Hz, 1H).  $^{13}\text{C}$  NMR (101 MHz,  $\text{CDCl}_3$ )  $\delta$  142.15, 141.55, 134.60, 131.41, 131.24, 127.86, 127.55, 116.90, 112.18, 107.93, 77.23.

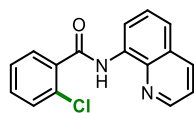

### 25b, 2-chloro-N-(quinolin-8-yl)benzamide

$^1\text{H}$  NMR (400 MHz,  $\text{CDCl}_3$ )  $\delta$  10.61 (s, 1H), 8.85 – 8.78 (m, 2H), 8.52 (dd,  $J = 8.6, 1.7$  Hz, 1H), 8.04 – 7.96 (m, 2H), 7.58 (d,  $J = 8.4$  Hz, 1H), 7.56 – 7.43 (m, 4H).  $^{13}\text{C}$  NMR (101 MHz,  $\text{CDCl}_3$ )  $\delta$  165.44, 148.79, 139.34, 134.91, 133.90, 133.50, 132.03, 128.87, 127.34, 127.30, 126.04, 124.51, 122.44, 116.49, 77.24.

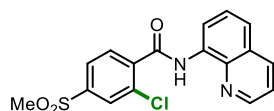

### 26b, 2-chloro-4-(methylsulfonyl)-N-(quinolin-8-yl)benzamide

$^1\text{H}$  NMR (500 MHz,  $\text{CDCl}_3$ )  $\delta$  10.51 (s, 1H), 8.93 (p,  $J = 4.5$  Hz, 1H), 8.81 (dd,  $J = 4.1, 1.9$  Hz, 1H), 8.22 (dd,  $J = 8.2, 1.9$  Hz, 1H), 8.11 (d,  $J = 1.8$  Hz, 1H), 8.03 – 7.95 (m, 2H), 7.63 (d,  $J = 4.5$  Hz, 2H), 7.50 (dd,  $J = 8.2, 4.1$  Hz, 1H), 3.14 (d,  $J = 1.7$  Hz, 3H).  $^{13}\text{C}$  NMR (126 MHz,  $\text{CDCl}_3$ )  $\delta$  163.16, 148.60, 143.21, 140.64, 138.51, 136.50, 133.87, 132.60, 131.02, 129.54, 128.00, 127.35, 126.09, 122.81, 121.95, 117.17, 44.48.

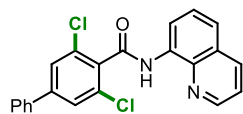

### 27b, 3,5-dichloro-N-(quinolin-8-yl)-[1,1'-biphenyl]-4-carboxamide

$^1\text{H}$  NMR (500 MHz,  $\text{CDCl}_3$ )  $\delta$  10.13 (s, 1H), 9.01 (dd,  $J = 7.2, 1.8$  Hz, 1H), 8.81 (dd,  $J = 4.3, 1.6$  Hz, 1H), 8.22 (dd,  $J = 8.3, 1.7$  Hz, 1H), 7.69 – 7.58 (m, 6H), 7.53 (d,  $J = 7.4$  Hz, 1H), 7.53 – 7.44 (m, 3H).  $^{13}\text{C}$  NMR (126 MHz,  $\text{CDCl}_3$ )  $\delta$  162.69, 148.45, 144.51, 138.49, 137.92, 136.43, 134.58, 134.01, 132.83, 129.21, 128.88, 128.03, 127.45, 127.15, 126.84, 122.51, 121.81, 117.22.

## Supplementary Information

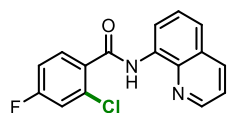

### **28b'**, 2-chloro-4-fluoro-N-(quinolin-8-yl)benzamide

$^1\text{H}$  NMR (500 MHz,  $\text{CDCl}_3$ )  $\delta$  10.38 (s, 1H), 9.31 (dt,  $J$  = 8.9, 1.5 Hz, 1H), 9.07 – 9.01 (m, 1H), 8.98 – 8.89 (m, 1H), 8.64 (dd,  $J$  = 8.8, 1.6 Hz, 1H), 8.61 (s, 0H), 7.80 – 7.74 (m, 1H), 7.30 – 7.17 (m, 4H).  $^{13}\text{C}$  NMR (126 MHz,  $\text{CDCl}_3$ )  $\delta$  163.43, 162.44, 149.29, 139.81, 139.59, 137.60, 133.64, 133.41, 127.51, 124.83, 121.75, 116.49, 116.29, 114.51, 77.25.

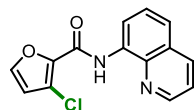

### **29b**, 3-chloro-N-(quinolin-8-yl)furan-2-carboxamide

$^1\text{H}$  NMR (500 MHz,  $\text{CDCl}_3$ )  $\delta$  10.75 (s, 1H), 8.95 (dd,  $J$  = 4.1, 1.6 Hz, 1H), 8.84 (d,  $J$  = 8.3 Hz, 1H), 8.61 (dd,  $J$  = 8.6, 1.8 Hz, 1H), 7.69 – 7.63 (m, 2H), 7.62 (dd,  $J$  = 8.5, 4.2 Hz, 1H), 7.33 (d,  $J$  = 3.5 Hz, 1H), 6.62 (dd,  $J$  = 3.5, 1.7 Hz, 1H).  $^{13}\text{C}$  NMR (126 MHz,  $\text{CDCl}_3$ )  $\delta$  156.35, 148.91, 148.17, 144.66, 139.21, 133.50, 133.43, 127.28, 126.04, 124.65, 122.47, 116.57, 115.40, 112.55.

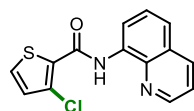

### **30b**, 3-chloro-N-(quinolin-8-yl)thiophene-2-carboxamide

$^1\text{H}$  NMR (400 MHz,  $\text{CDCl}_3$ )  $\delta$  11.29 (s, 1H), 8.85 (dd,  $J$  = 4.2, 1.6 Hz, 1H), 8.77 (d,  $J$  = 8.4 Hz, 1H), 8.53 (dd,  $J$  = 8.6, 1.6 Hz, 1H), 7.61 – 7.46 (m, 3H), 7.02 (d,  $J$  = 5.2 Hz, 1H).  $^{13}\text{C}$  NMR (101 MHz,  $\text{CDCl}_3$ )  $\delta$  158.69, 149.02, 139.47, 133.96, 133.82, 133.37, 130.20, 129.86, 127.27, 126.04, 125.02, 124.24, 122.46, 117.25, 77.23.

## Substrate preparation

Synthesis of (3-chlorobutyl)benzene, **C13**:<sup>1</sup>

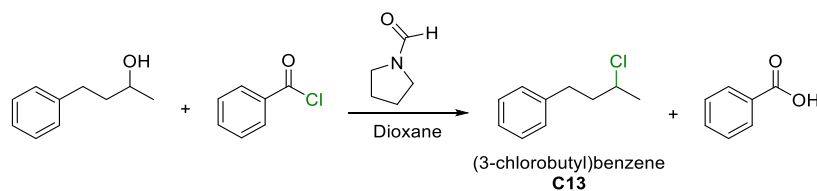

4-Phenyl-2-butanol (2 mmol), benzoyl chloride (1.2 equiv., 2 mmol), formyl pyrrolidine (20 mol%, 0.4 mmol) and dioxane (2 mL) were added to a cylindrical pressure vessel and heated at 80 °C for 24 h. The reaction mixture was concentrated under vacuum and purified with silica gel chromatography to afford pure **C13** (yield: 80%).

Synthesis of 2,4-dichloropentane **5c**:<sup>2</sup>

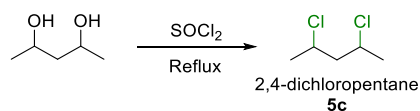

## Supplementary Information

Thionyl chloride ( $\text{SOCl}_2$ , 50 g) was slowly added to a solution of pyridine (1 g) and 2,4-pentanediol (8 g) at  $-10^\circ\text{C}$ . After addition, the reaction mixture was heated at reflux for 3 h. After cooling to room temperature, ice water (200 mL) was added to the reaction mixture and the product extracted with diethyl ether ( $3 \times 200$  mL). The organic phase was washed with aqueous  $\text{NaHCO}_3$  and water and dried with  $\text{Na}_2\text{SO}_4$ . Pure product was obtained by fractional distillation (b.p.  $140^\circ\text{C}$ , yield: 63%).

Synthesis of (chloro(cyclopropyl)methyl)benzene **9c**:<sup>3</sup>

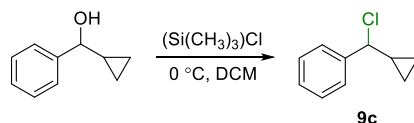

Trimethylchlorosilane (30.0 mmol, 5.0 equiv.) was added dropwise into a solution of 1-phenyl-1-cyclopropylmethanol (6.0 mmol) in dry dichloromethane (DCM, 6 mL) at  $0^\circ\text{C}$  under  $\text{N}_2$ . The reaction was stirred at  $0^\circ\text{C}$  for 1 h, then quenched with water (20 mL) and the product extracted with DCM ( $3 \times 20$  mL). The organic phase was washed with brine, dried and concentrated in vacuo to give a colorless oil. The product was purified using silica gel chromatography.

Synthesis of pyridine and pyrimidine directing arenes:<sup>4</sup>

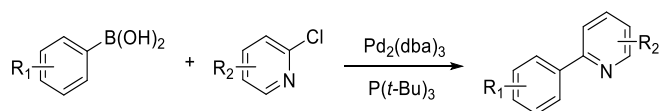

Aryl chloride (2 mmol), boronic acid (2.4 mmol), tris(dibenzylideneacetone)dipalladium(0) ( $\text{Pd}_2(\text{dba})_3$ , 0.03 mmol, 1.5 mol%),  $\text{P}(t\text{-Bu})_3$  (0.08 mmol, 4 mol%),  $\text{Cs}_2\text{CO}_3$  (5 mmol) and dioxane (5 mL) were added to a Schlenk tube charged with  $\text{N}_2$  and heated at  $80^\circ\text{C}$  for 5 h. After cooling to room temperature, the reaction mixture was concentrated under vacuum and the product purified using silica gel chromatography.

Synthesis of pyrazol directing arenes:<sup>5</sup>

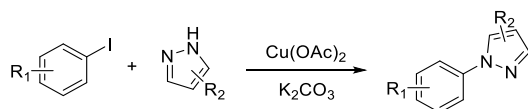

Aryl iodide (2.4 mmol), pyrazol (2.0 mmol),  $\text{Cs}_2\text{CO}_3$  (4 mmol) and DMF (5 mL) were added to a Schlenk tube charged with  $\text{N}_2$  and heated at  $110^\circ\text{C}$  for 24 h. After cooling to ambient temperature, a saturated aqueous  $\text{NH}_4\text{Cl}$  solution (20 mL) was added and the product extracted with EA ( $3 \times 20$  mL). The organic phase was washed with brine and water, dried with  $\text{Na}_2\text{SO}_4$  and purified using silica gel chromatography.

Synthesis of 8-aminoquinoline directing arenes:<sup>6</sup>

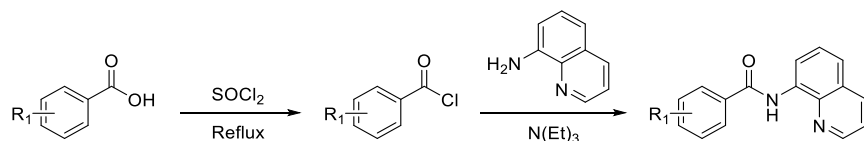

The carboxylic acid (12 mmol) and  $\text{SOCl}_2$  (11 mL) were added heated under reflux for 3 h at  $85^\circ\text{C}$ . After cooling to ambient temperature, the reaction mixture was concentrated under vacuum to afford the crude acyl chloride. Dry DCM (20 mL) was added under a  $\text{N}_2$  atmosphere and 8-aminoquinoline (10 mmol) and  $\text{NEt}_3$  (11 mmol) were dissolved in DCM (20 mL), and slowly added dropwise to the acyl chloride solution.

## Supplementary Information

The reaction was stirred at room temperature for 6 h. After reaction, the mixture was concentrated under vacuum and purified using silica gel chromatography.

Synthesis of benzo[h]quinoliny Pd(II) chloride dimer:<sup>7</sup>

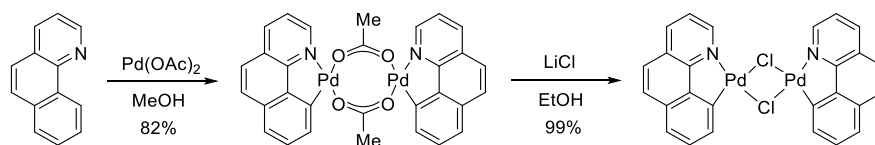

$\text{Pd}(\text{OAc})_2$  (6 mmol, 1 equiv.) and benzo[h]quinoline **1a** (6 mmol, 1 equiv.) was added into a  $\text{MeOH}$  (80 mL) solution, stirred at RT for 8 h. The yellow precipitate was isolated by filtration and washed with  $\text{MeOH}$  ( $3 \times 20$  mL) and  $\text{Et}_2\text{O}$  ( $3 \times 20$  mL), giving benzo[h]quinoliny Pd(II) acetate dimer in 82% yield.  $\text{LiCl}$  (20 mmol, 20 equiv.) was added into a benzo[h]quinoliny Pd(II) acetate dimer (1 mmol, 1 equiv.) and  $\text{EtOH}$  (10 mL) suspension at  $0^\circ\text{C}$ . Then the ice-water bath was removed and the suspension was stirred at RT for another 1 h. The pale yellow precipitate was isolated by filtration and washed with water ( $3 \times 20$  mL),  $\text{MeOH}$  ( $3 \times 20$  mL), and  $\text{Et}_2\text{O}$  ( $3 \times 20$  mL), giving the benzo[h]quinoliny Pd(II) chloride dimer in 99% yield.

### Analytical Methods

Qualitative and quantitative analysis of gas phase products was performed by gas chromatography (GC) using an Agilent 7890B instrument equipped with a hydrogen flame-ionization detector (FID) and a thermal conductivity detector (TCD). The GC yield was determined based on standard gas mixtures and integrated peak areas. Qualitative and quantitative analysis of crude liquid products was performed using an Agilent 7000C GCMS equipped with a hydrogen flame-ionization detector (FID), electron ionization mass detector (EI-MS) and HP-5 nonpolar column. The GC yield was determined based on internal standard curves and integrated peak areas.

Determination of the molecular weight and polydispersity of the polymers was performed using Gel Permeation Chromatography (GPC, Agilent 390-MDS), equipped with refractive index detector (RI), and Dual-Angle Light Scattering detector. THF was used as eluent. For the measurement after reaction, to the DMSO solution (2 mL) brine (10 mL) was added and the organic components extracted with THF ( $3 \times 5$  mL). The THF extract was used for GPC.

$^1\text{H}$  and  $^{13}\text{C}$  NMR spectra recorded on a Bruker Avance III HD 400 instrument equipped with a 5 mm BBFO probe.  $\text{DMSO-d}_6$  or  $\text{CDCl}_3$  were used as solvent.  $\text{DMSO-d}_6$  was used as the reaction solvent for the reaction that was monitored by  $^1\text{H}$  NMR spectroscopy. After centrifuging to remove the  $\text{PdO}$  catalyst, the crude reaction mixture (0.2 mL) was diluted with  $\text{DMSO-d}_6$  or  $\text{THF-d}_8$  (0.4 mL) and directly used for  $^1\text{H}$  NMR experiment.

## Supplementary Figures

**Supplementary Table 1.** Summary of recent approaches reported for the destruction of PVC.

| Year                    | Catalyst                                                             | Solvent                           | Product                     | Temp. (°C) | Yield (%) | Fate of Cl             | Ref. |
|-------------------------|----------------------------------------------------------------------|-----------------------------------|-----------------------------|------------|-----------|------------------------|------|
| Homogeneous catalysts   |                                                                      |                                   |                             |            |           |                        |      |
| 2000                    | NaOH                                                                 | NaOH                              | Oxalic acid                 | 250        | 40        | Neutralization by base | 8    |
| 2008                    | Ammonia                                                              | Ammonia                           | Polyene compounds           | 230        | 80        | Neutralization by base | 9    |
| 2010                    | [Bmim]Cl                                                             | [Bmim]Cl                          | Polyene compounds           | 220        | 90        | Post-neutralization    | 10   |
| 2010                    | TBAB                                                                 | Na <sub>2</sub> S/ethylene glycol | Polyene compounds           | 170        | 58        | Post-neutralization    | 11   |
| 2011                    | Ca(OH) <sub>2</sub>                                                  | Ethylene glycol                   | Polyene compounds           | 190        | 86        | Neutralization by base | 12   |
| 2014                    | [P <sub>4444</sub> ][Cl]                                             | [P <sub>4444</sub> ][Cl]          | <i>Trans</i> -polyacetylene | 180        | 98        | Post-neutralization    | 13   |
| 2020                    | Ionic liquids                                                        | Ionic liquids                     | Polyene compounds           | 160        | 85        | HCl emissions          | 14   |
| 2023                    | [Ph <sub>3</sub> C][B(C <sub>6</sub> F <sub>5</sub> ) <sub>4</sub> ] | Benzene                           | Polyene compounds           | 110        | 77        | Et <sub>3</sub> SiCl   | 15   |
| 2023                    | Bu <sub>4</sub> PCl and H(CO)Rh(PPh <sub>3</sub> ) <sub>3</sub>      | 2-Butanone                        | Polyene compounds           | 180        | 81        | HCl emissions          | 16   |
| Heterogeneous catalysts |                                                                      |                                   |                             |            |           |                        |      |
| 2007                    | La-MgO                                                               | -                                 | Polyene compounds           | 400        | 30        | HCl, HOCl, emissions   | 17   |
| 2016                    | Al-modified graphitic-C <sub>3</sub> N <sub>4</sub> (10 wt% Al)      | Polyethylene glycol               | Dechlorinated PVC           | 170        | 75        | HCl emissions          | 18   |
| 2018                    | CuAl-layered double hydroxide                                        | -                                 | Solid                       | 600        | 81        | HCl, HOCl, emissions   | 19   |
| 2020                    | ZnFeAl-layered double hydroxide                                      | -                                 | Solid                       | 300-800    | 98        | HCl, HOCl emissions    | 20   |
| 2021                    | Benzimidazole modified layered double hydroxide                      | -                                 | Solid                       | 300-600    | 95        | HCl, HOCl emissions    | 21   |
| 2023                    | Mg/Al mixed oxide                                                    | -                                 | Dechlorinated PVC           | 250        | 100       | HCl emissions          | 22   |

## Supplementary Information

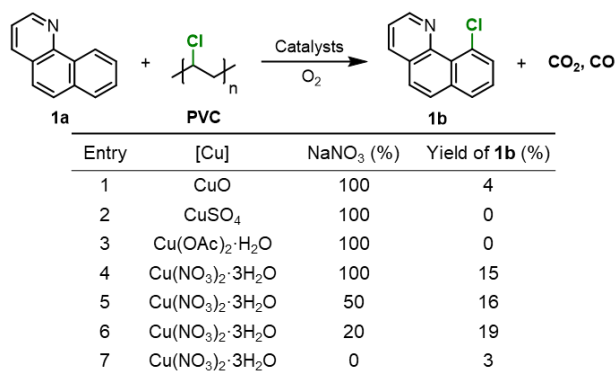

**Supplementary Figure 1.** Cu catalyzed aerobic chlorination using PVC as a chlorination reagent (without a Pd catalyst). Reaction conditions: 7,8-benzoquinoline **1a** (0.25 mmol), PVC (1.5 equiv., 0.375 mmol), Cu catalyst (20 mol%, 0.05 mmol), NaNO<sub>3</sub> (0-100 mol%), biphenyl (0.2 mmol, internal standard), DMSO (2 mL), O<sub>2</sub> (3 bar), 140 °C, 15 h

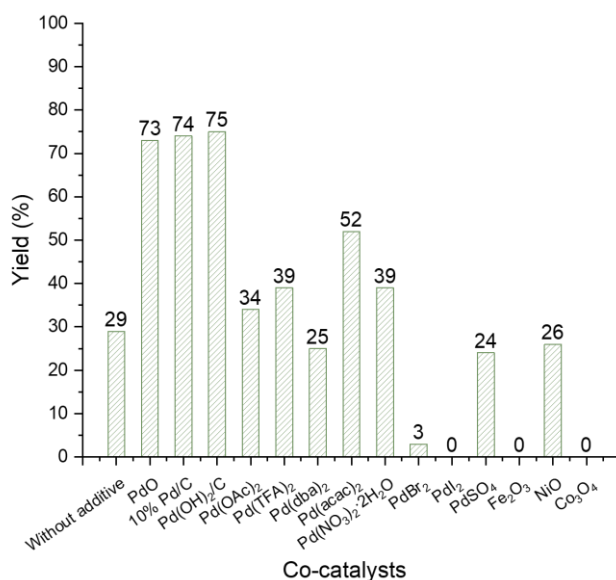

**Supplementary Figure 2.** Screening of Pd catalysts. Reaction conditions: 7,8-benzoquinoline **1a** (0.25 mmol), PVC (1.5 equiv., 0.375 mmol), Cu(NO<sub>3</sub>)<sub>2</sub>·3H<sub>2</sub>O (20 mol%, 0.05 mmol), **Pd catalyst** (10 mol%, 0.025 mmol), NaNO<sub>3</sub> (100 mol%, 0.25 mmol), biphenyl (0.2 mmol), DMSO (2 mL), O<sub>2</sub> (3 bar), 140 °C, 15 h.

## Supplementary Information

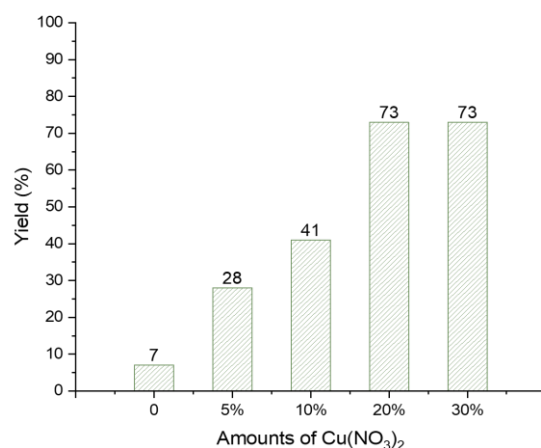

**Supplementary Figure 3.** Optimization of the  $\text{Cu}(\text{NO}_3)_2$  concentration. Reaction conditions: 7,8-benzoquinoline **1a** (0.25 mmol), PVC (1.5 equiv., 0.375 mmol),  $\text{Cu}(\text{NO}_3)_2 \cdot 3\text{H}_2\text{O}$  (0-30 mol%), PdO (10 mol%, 0.025 mmol),  $\text{NaNO}_3$  (100 mol%, 0.25 mmol), biphenyl (0.2 mmol), DMSO (2 mL),  $\text{O}_2$  (3 bar), 140 °C, 15 h.

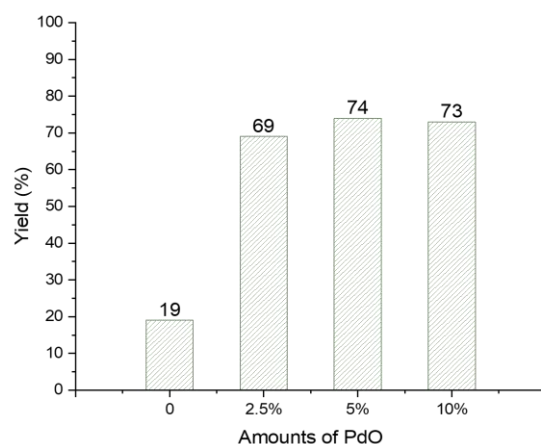

**Supplementary Figure 4.** Optimization of the PdO concentration. Reaction conditions: 7,8-benzoquinoline **1a** (0.25 mmol), PVC (1.5 equiv., 0.375 mmol),  $\text{Cu}(\text{NO}_3)_2 \cdot 3\text{H}_2\text{O}$  (20 mol%, 0.05 mmol), PdO (0-10 mol%),  $\text{NaNO}_3$  (100 mol%, 0.25 mmol), biphenyl (0.2 mmol), DMSO (2 mL),  $\text{O}_2$  (3 bar), 140 °C, 15 h.

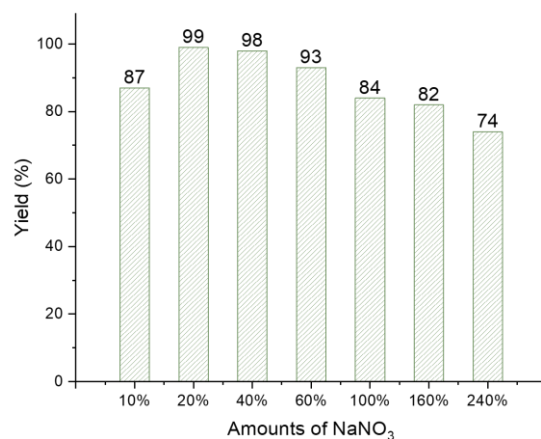

**Supplementary Figure 5.** Optimization of the NaNO<sub>3</sub> concentration. Reaction conditions: 7,8-benzoquinoline **1a** (0.25 mmol), PVC (1.5 equiv., 0.375 mmol), Cu(NO<sub>3</sub>)<sub>2</sub>•3H<sub>2</sub>O (20 mol%, 0.05 mmol), PdO (5 mol%, 0.0125 mmol), **NaNO<sub>3</sub> (10-240 mol%)**, biphenyl (0.2 mmol), DMSO (2 mL), O<sub>2</sub> (3 bar), 140 °C, 15 h.

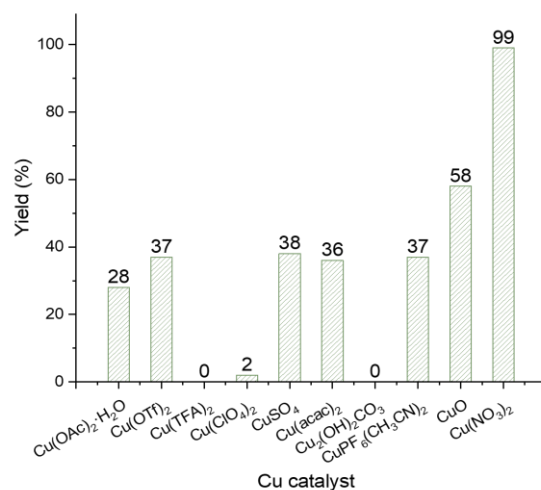

**Supplementary Figure 6.** Screening of Cu catalysts. Reaction conditions: 7,8-benzoquinoline **1a** (0.25 mmol), PVC (1.5 equiv., 0.375 mmol), **Cu catalyst (20 mol%, 0.05 mmol)**, PdO (5 mol%, 0.0125 mmol), NaNO<sub>3</sub> (20 mol%, 0.05 mmol), biphenyl (0.2 mmol), DMSO (2 mL), O<sub>2</sub> (3 bar), 140 °C, 15 h.

## Supplementary Information

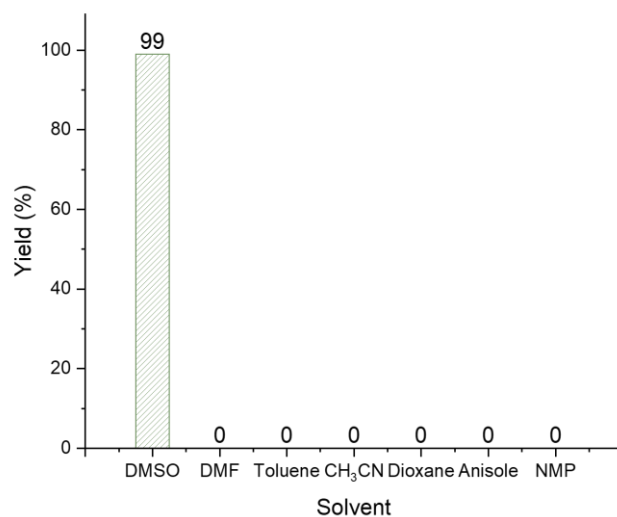

**Supplementary Figure 7.** Screening of the solvent. Reaction conditions: 7,8-benzoquinoline **1a** (0.25 mmol), PVC (1.5 equiv., 0.375 mmol), Cu(NO<sub>3</sub>)<sub>2</sub>•3H<sub>2</sub>O (20 mol%, 0.05 mmol), PdO (5 mol%, 0.0125 mmol), NaNO<sub>3</sub> (20 mol%, 0.05 mmol), biphenyl (0.2 mmol), **solvent (2 mL)**, O<sub>2</sub> (3 bar), 140 °C, 15 h.

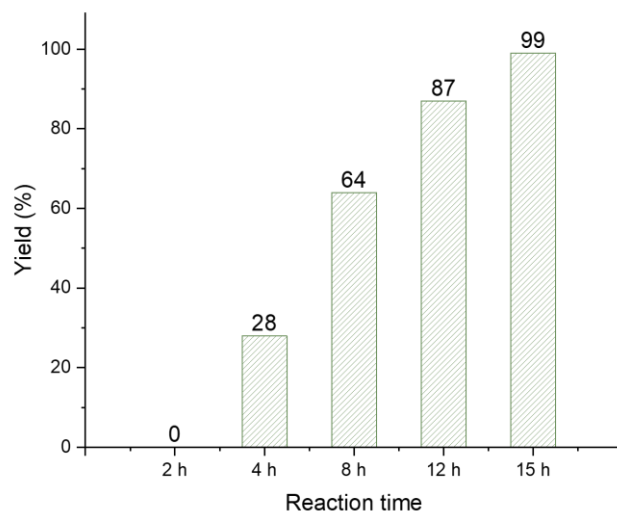

**Supplementary Figure 8.** Optimization of reaction time. Reaction conditions: 7,8-benzoquinoline **1a** (0.25 mmol), PVC (1.5 equiv., 0.375 mmol), Cu(NO<sub>3</sub>)<sub>2</sub>•3H<sub>2</sub>O (20 mol%, 0.05 mmol), PdO (5 mol%, 0.0125 mmol), NaNO<sub>3</sub> (20 mol%, 0.5 mmol), biphenyl (0.2 mmol), DMSO (2 mL), O<sub>2</sub> (3 bar), 140 °C, **2-15 h**.

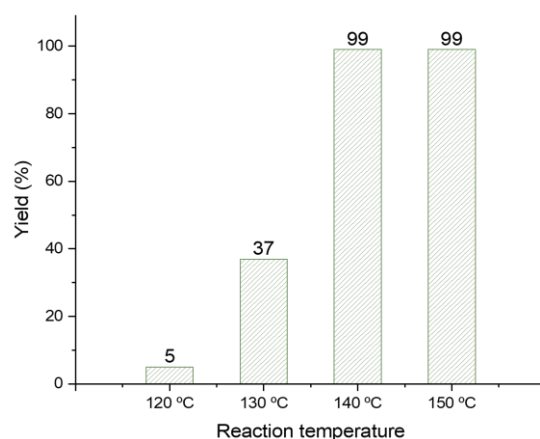

**Supplementary Figure 9.** Optimization of reaction temperature. Reaction conditions: 7,8-benzoquinoline **1a** (0.25 mmol), PVC (1.5 equiv., 0.375 mmol),  $\text{Cu}(\text{NO}_3)_2 \cdot 3\text{H}_2\text{O}$  (20 mol%, 0.05 mmol), PdO (5 mol%, 0.0125 mmol),  $\text{NaNO}_3$  (20 mol%, 0.05 mmol), biphenyl (0.2 mmol), DMSO (2 mL),  $\text{O}_2$  (3 bar), **120-150** °C, 15 h.

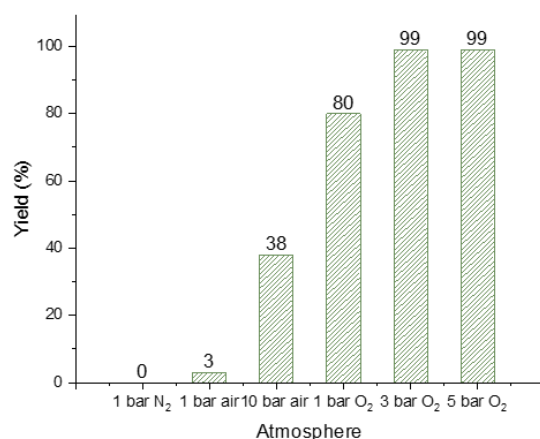

**Supplementary Figure 10.** Optimization of gas and pressure. Reaction conditions: 7,8-benzoquinoline **1a** (0.25 mmol), PVC (1.5 equiv., 0.375 mmol),  $\text{Cu}(\text{NO}_3)_2 \cdot 3\text{H}_2\text{O}$  (20 mol%, 0.05 mmol), PdO (5 mol%, 0.0125 mmol),  $\text{NaNO}_3$  (20 mol%, 0.05 mmol), biphenyl (0.2 mmol), DMSO (2 mL), **gas**, 140 °C, 15 h.

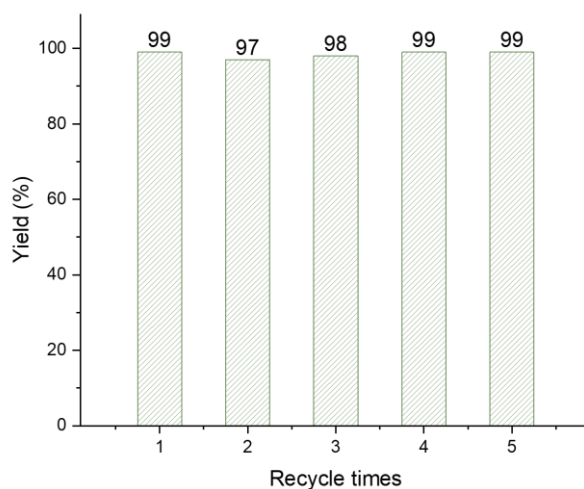

**Supplementary Figure 11.** Recycling of the PdO catalyst. Reactions were performed using the standard reaction conditions. PdO was recovered by filtration, and was washed with water, acetone, ethyl acetate and diethyl ether, dried under vacuum at 30 °C for 18 h.

**Supplementary Table 2.** Optimization of CO production.

| Entry | Variation from standard conditions                   | Yield of 1b (%) | Yield of CO (%) | Yield of CO <sub>2</sub> (%) |
|-------|------------------------------------------------------|-----------------|-----------------|------------------------------|
| 1     | Standard conditions                                  | 99              | 15              | 81                           |
| 2     | 50 mol% bis(benzene)chromium                         | 72              | 48              | 50                           |
| 3     | 50 mol% Cr(CO) <sub>6</sub>                          | 68              | 33              | 65                           |
| 4     | 50 mol% Cr <sub>2</sub> O <sub>3</sub>               | 65              | 20              | 80                           |
| 5     | 50 mol% Cr <sub>2</sub> O <sub>3</sub> ·CuO          | 66              | 25              | 72                           |
| 6     | 50 mol% PbCl <sub>2</sub>                            | 98              | 10              | 90                           |
| 7     | 50 mol% CaCO <sub>3</sub>                            | 99              | 10              | 89                           |
| 8     | 50 mol% Na <sub>2</sub> SO <sub>4</sub>              | 45              | 30              | 66                           |
| 9     | 50 mol% Na <sub>2</sub> HPO <sub>4</sub>             | 92              | 16              | 83                           |
| 10    | 50 mol% MgCl <sub>2</sub>                            | 55              | 32              | 67                           |
| 11    | 20 equivalent H <sub>2</sub> O                       | 54              | 24              | 76                           |
| 12    | Lindlar catalyst instead of PdO                      | 32              | 37              | 60                           |
| 13    | 5% Pd/CaCO <sub>3</sub> instead of PdO               | 99              | 11              | 89                           |
| 14    | 10% Pd/C instead of PdO                              | 99              | 15              | 85                           |
| 15    | 10% Pd/Al <sub>2</sub> O <sub>3</sub> instead of PdO | 99              | 9               | 90                           |
| 16    | 5% Pd/BaSO <sub>4</sub> instead of PdO               | 95              | 5               | 90                           |
| 17    | 1 bar O <sub>2</sub>                                 | 80              | 16              | 81                           |
| 18    | 1 bar air                                            | 3               | 15              | 85                           |
| 19    | 5 bar air                                            | 30              | 16              | 83                           |
| 20    | No PdO catalyst                                      | 12              | 83              | 17                           |

Reaction conditions are the same as those given in Fig. 2a, entry 7.

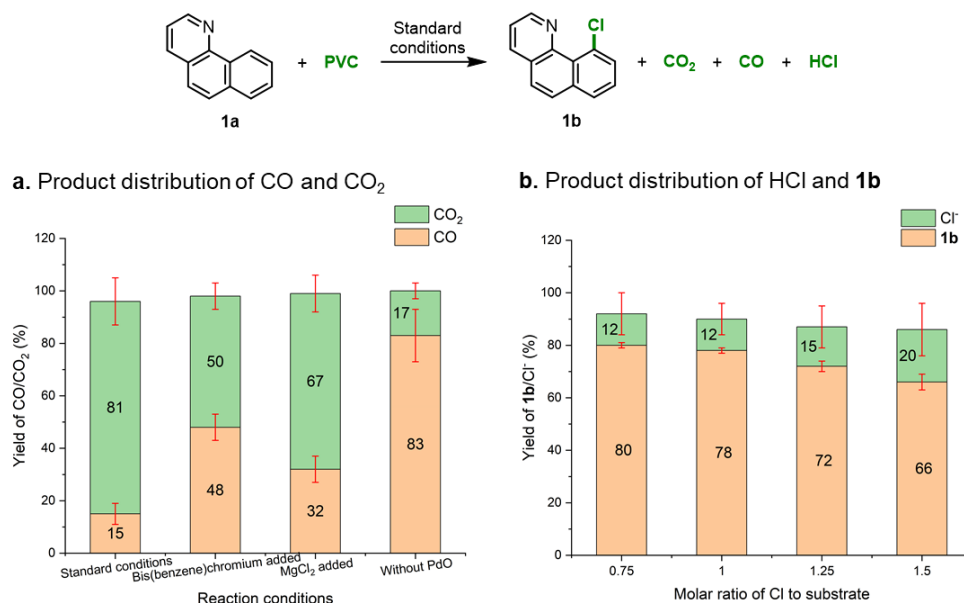

**Supplementary Figure 12.** Quantification of products. Each reaction was repeated three times to obtain the standard errors ( $n = 3$ ). The bar graph with labels represents the mean value of reaction yield. Reaction yield were expressed as mean values  $\pm$  standard error. **(a)** Product distribution of CO and CO<sub>2</sub>. Reaction conditions are the same as those given in Supplementary Table 2, entries 1, 2, 10 and 20. **(b)** Product distribution of **1b** and HCl. The chloride concentration in the aqueous phase was determined by ion chromatography. Reaction conditions are the same as those given in Supplementary Table 2, entry 1, but with different amount of PVC (molar ratio of Cl to substrate range from 0.75 to 1.5). Note, HCl is volatile and some is lost during sample preparation (e.g. transfer, dilution).

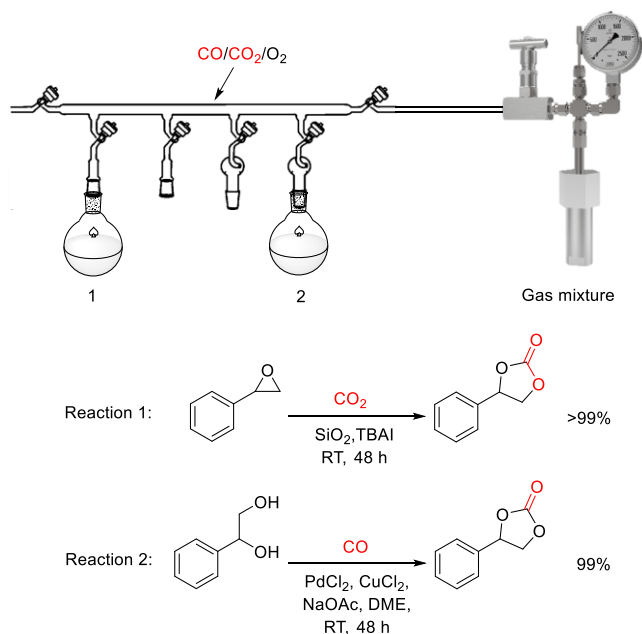

**Supplementary Figure 13.** Reaction of the CO/CO<sub>2</sub> containing gas produced. Reaction conditions: **(1)** Styrene oxide (2 mmol), SiO<sub>2</sub> (100 mg), tetrabutylammonium iodide (TBAI, 0.06 mmol), RT, 48 h. **(2)** 1-

## Supplementary Information

Phenylethane-2,3-diol (0.2 mmol), PdCl<sub>2</sub> (0.02 mmol), CuCl<sub>2</sub> (0.4 mmol), NaOAc (0.04 mmol), dichloromethane (DME, 5 mL), RT, 48 h.<sup>23</sup> Yields were determined by GC.

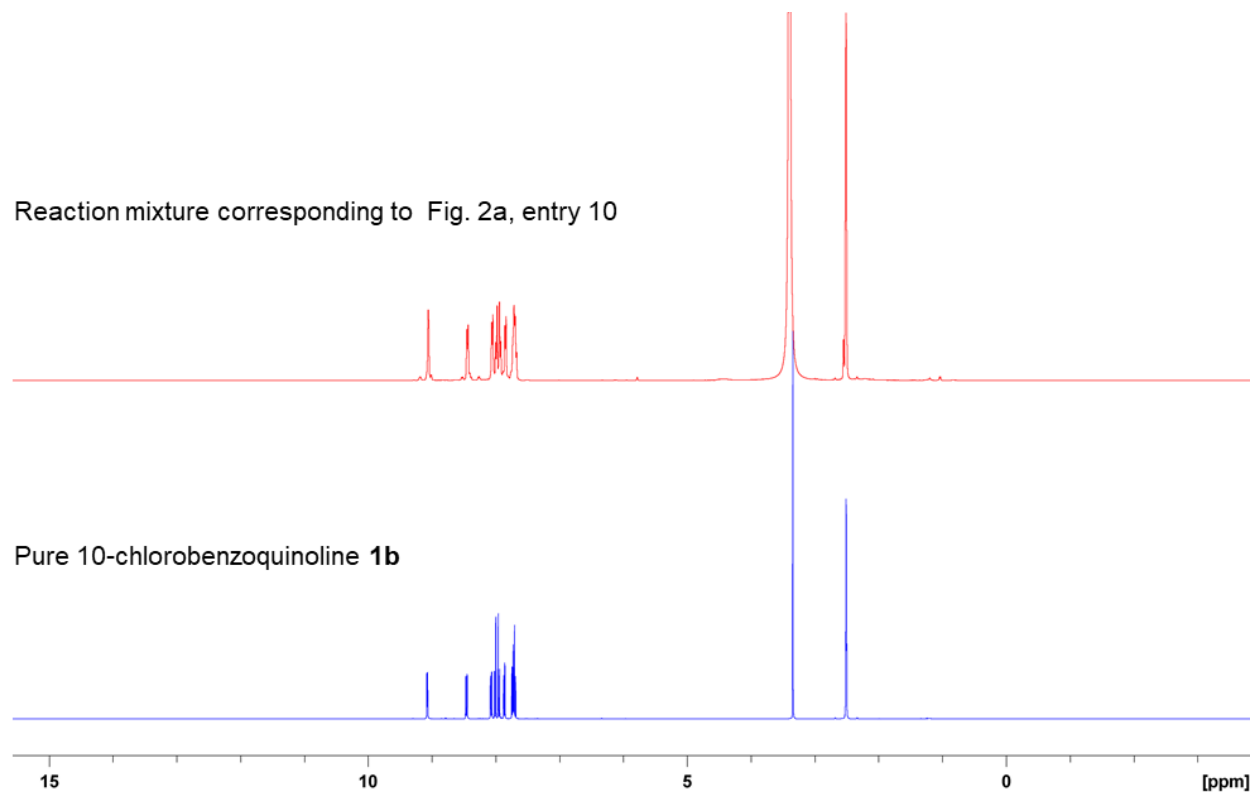

**Supplementary Figure 14.** Comparison of the <sup>1</sup>H NMR spectra of crude product **1b** and pure **1b**. Crude product **1b** is the unpurified reaction mixture corresponding to Fig. 2a, entry 7. Pure **1b** was obtained by purification using silica gel chromatography.

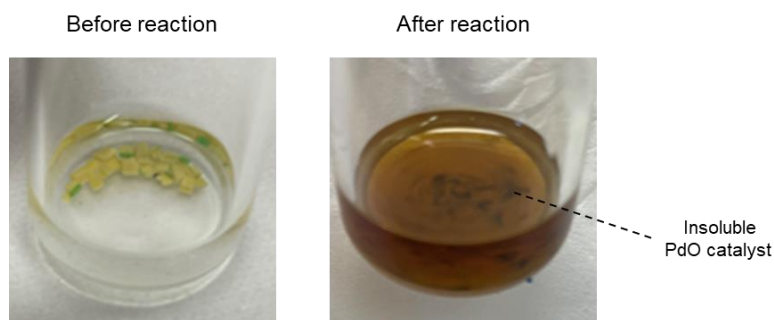

**Supplementary Figure 15.** Photographs showing the reaction using electric wire before and after reaction.

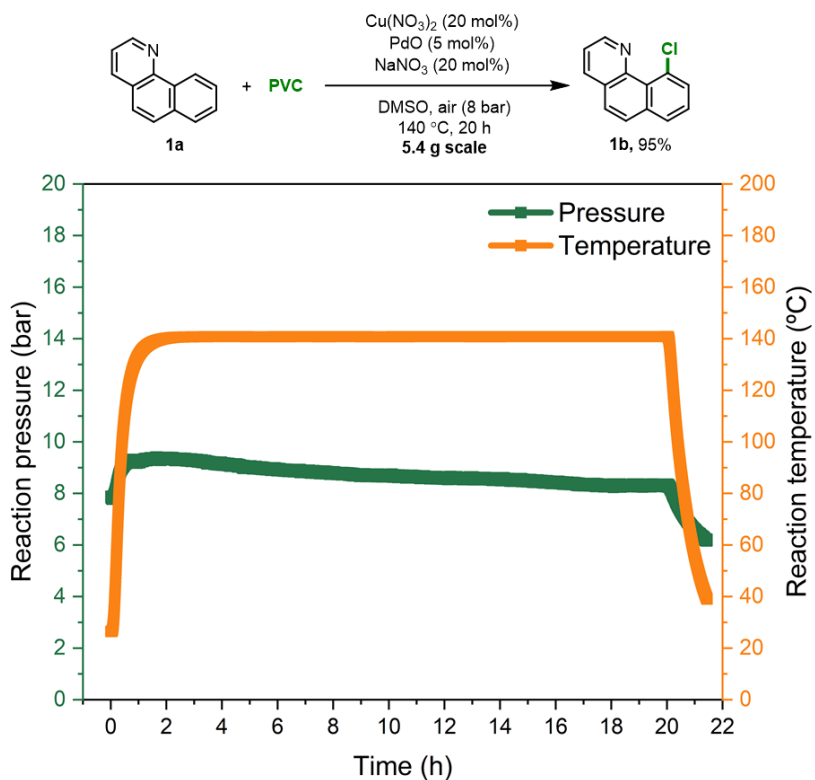

**Supplementary Figure 16.** Monitoring of the pressure and temperature for the reaction of **1a** on a 5.4 g scale.

**Supplementary Table 3.** Additive screening to demonstrate functional group compatibility.

|                                                                                     |   |                                                                                     |   |                                                                                     |   |                                                                                     |                                                                                      |                                                                                       |                 |   |                  |
|-------------------------------------------------------------------------------------|---|-------------------------------------------------------------------------------------|---|-------------------------------------------------------------------------------------|---|-------------------------------------------------------------------------------------|--------------------------------------------------------------------------------------|---------------------------------------------------------------------------------------|-----------------|---|------------------|
| 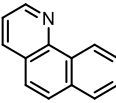 | + | PVC                                                                                 | + | Additives<br>(100 mol%)                                                             | → | Standard<br>conditions                                                              |  | +                                                                                     | CO <sub>x</sub> | + | H <sub>2</sub> O |
| <b>1a</b>                                                                           |   |                                                                                     |   | <b>d</b>                                                                            |   |                                                                                     | <b>1b</b>                                                                            |                                                                                       |                 |   |                  |
| <hr/>                                                                               |   |                                                                                     |   |                                                                                     |   |                                                                                     |                                                                                      |                                                                                       |                 |   |                  |
|  |   |  |   |  |   |  |                                                                                      |  |                 |   |                  |
| <b>1d</b> , 98% (100%)                                                              |   | <b>2d</b> , 52% (0%)                                                                |   | <b>3d</b> , 93% (0%)                                                                |   | <b>4d</b> , 94% (90%)                                                               |                                                                                      | <b>5d</b> , 99% (100%)                                                                |                 |   |                  |
|  |   |  |   |  |   |  |                                                                                      |  |                 |   |                  |
| <b>6d</b> , 98% (15%)                                                               |   | <b>7d</b> , 95% (100%)                                                              |   | <b>8d</b> , 49% (76%)                                                               |   | <b>9d</b> , 98% (0%)                                                                |                                                                                      | <b>10d</b> , 99% (0%)                                                                 |                 |   |                  |
|  |   |  |   |  |   |  |                                                                                      |  |                 |   |                  |
| <b>11d</b> , 91% (85%)                                                              |   | <b>12d</b> , 39% (0%)                                                               |   | <b>13d</b> , 93% (0%)                                                               |   | <b>14d</b> , 86% (80%)                                                              |                                                                                      | <b>15d</b> , 99% (100%)                                                               |                 |   |                  |
|  |   |  |   |  |   |  |                                                                                      |  |                 |   |                  |
| <b>16d</b> , 97% (44%)                                                              |   | <b>17d</b> , 97% (0%)                                                               |   | <b>18d</b> , 36% (57%)                                                              |   | <b>19d</b> , 95% (0%)                                                               |                                                                                      | <b>20d</b> , 95% (0%)                                                                 |                 |   |                  |

## Supplementary Information

Reaction conditions are the same as those reported in Supplementary Table 2, entry 1. The remaining additive is given in parenthesis.

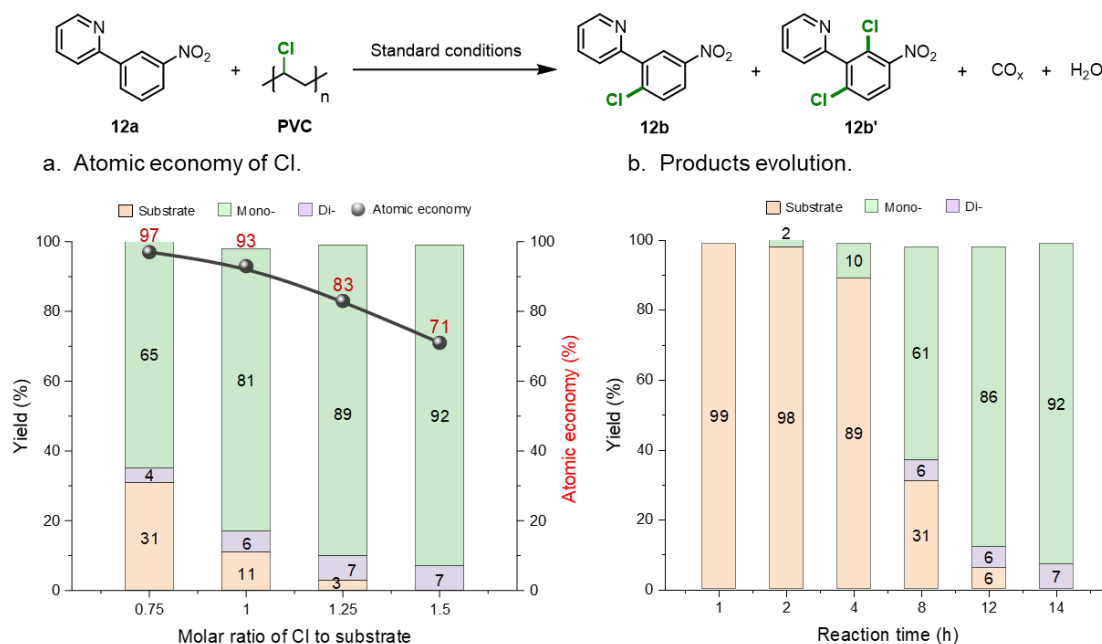

**Supplementary Figure 17.** Effect of PVC loading and Cl atom economy on yield and selectivity of *ortho*-di and monochloride products in the reaction between **12a** and PVC under the standard reaction conditions. (a) Cl atom economy and selectivity to the monochloride product **12b** with different PVC loadings (0.75 to 1.5 equiv. based on **12a**). Reactions were performed using the standard conditions: **12a** (0.25 mmol), PVC water pipe (0.75-1.5 equiv.), Cu(NO<sub>3</sub>)<sub>2</sub>•3H<sub>2</sub>O (20 mol%, 0.05 mmol), PdO (5 mol%, 0.0125 mmol), NaNO<sub>3</sub> (20 mol%, 0.05 mmol), DMSO (2 mL), O<sub>2</sub> (3 bar), 140 °C, 15 h. (b) Evolution of the reaction with time. The bar graph with labels represents the mean value of reaction yield.

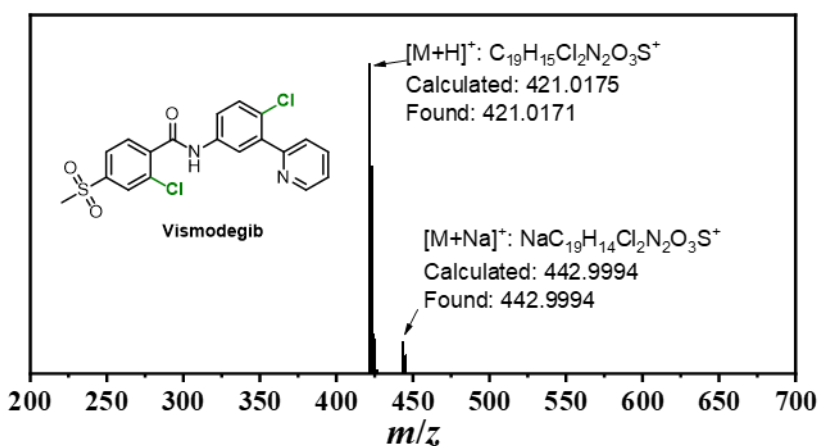

**Supplementary Figure 18.** Electrospray ionisation mass spectrum (ESI-MS) of vismodegib in THF (0.001 mmol/mL).

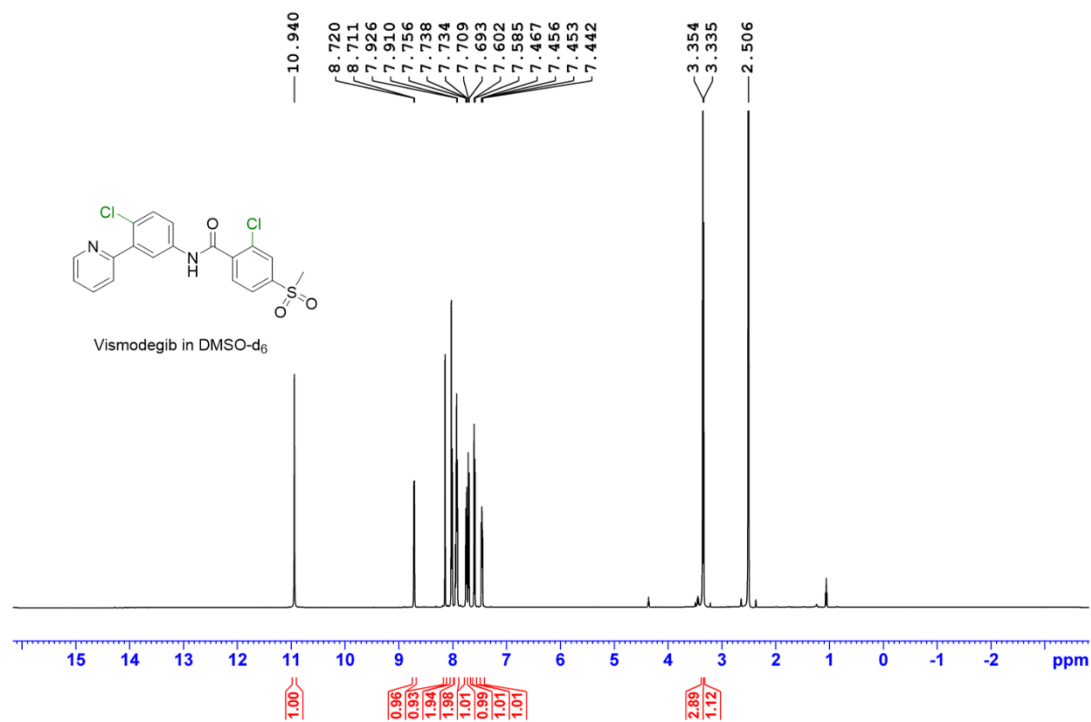

**Supplementary Figure 19.** <sup>1</sup>H NMR spectrum of vismodegib in DMSO-d<sub>6</sub>.

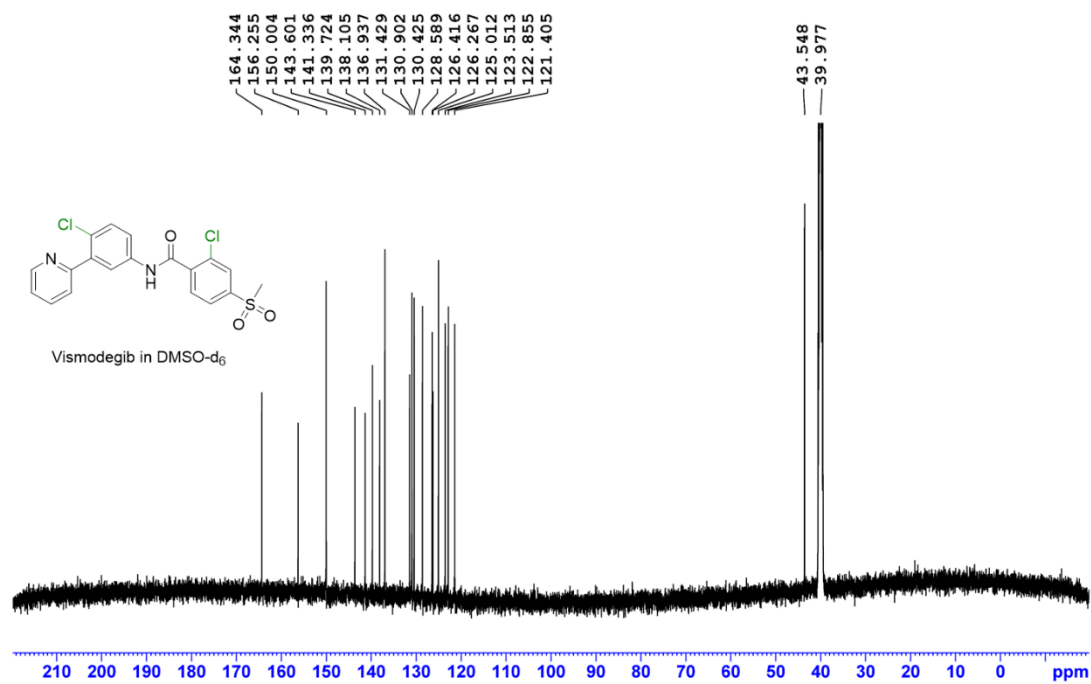

**Supplementary Figure 20.** <sup>13</sup>C NMR spectrum of vismodegib in DMSO-d<sub>6</sub>.

**Supplementary Table 4.** Elemental analysis of vismodegib.

| Elemental composition | Calculated (wt%) | Found-1 (wt%) | Found-2 (wt%) | Found-3 (wt%) |
|-----------------------|------------------|---------------|---------------|---------------|
| C                     | 54.17            | 54.10         | 54.10         | 54.11         |
| H                     | 3.35             | 3.48          | 3.44          | 3.45          |
| N                     | 6.65             | 6.48          | 6.68          | 6.60          |
| S                     | 7.61             | 7.43          | 7.22          | 7.60          |

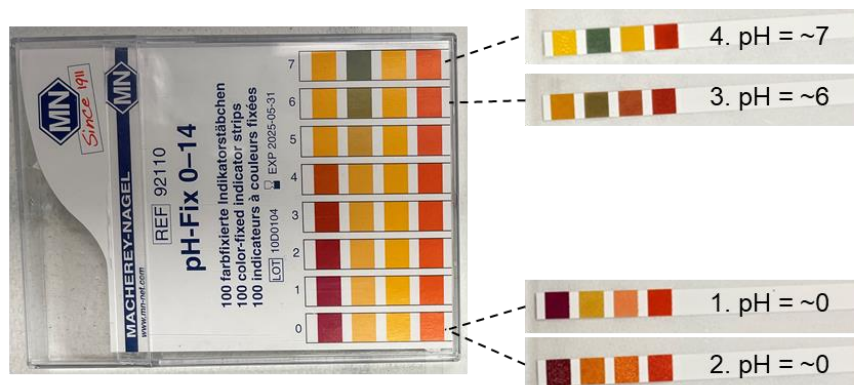

Reaction 1: PVC (2 mmol), THF (2 mL), O<sub>2</sub> (3 bar)

Reaction 2: Standard reaction conditions (Fig. 2a, entry 10)

Reaction 3: PVC (2 mmol), DMSO (2 mL), O<sub>2</sub> (3 bar)

Reaction 4: 1-phenylethyl chloride (**4c**) (2 mmol), DMSO (2 mL), O<sub>2</sub> (3 bar)

**Supplementary Figure 21.** pH tests of the reaction mixture. Reaction mixture was diluted with H<sub>2</sub>O (1:1).

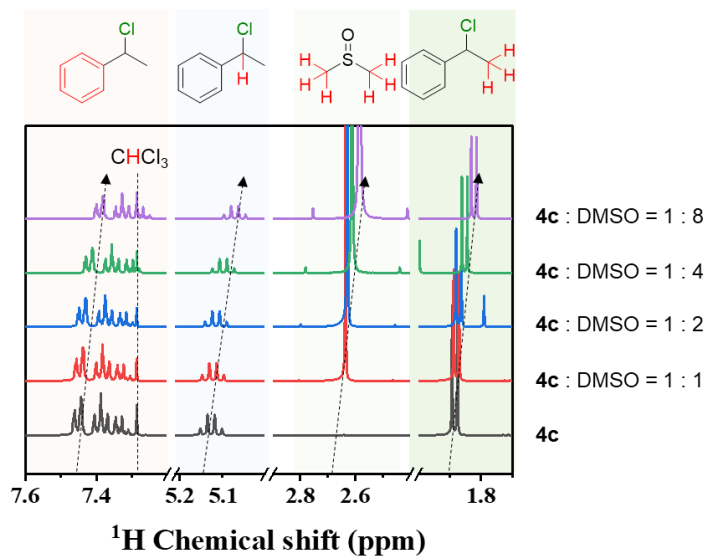

**Supplementary Figure 22.** <sup>1</sup>H NMR spectra of 1-phenylethyl chloride (**4c**, concentration: 1 mmol/mL) and DMSO (concentration: 1-8 mmol/mL) in CDCl<sub>3</sub>. The peak at 7.26 ppm corresponding to the proton in CHCl<sub>3</sub>

## Supplementary Information

(present in the  $\text{CDCl}_3$  solvent) does not change with the DMSO concentration and may be considered as an internal standard. As the concentration of DMSO increases the characteristic peaks of **4c** shift to lower frequencies, indicative of non-covalent interactions between the DMSO and **4c**, activating the C–Cl bond.<sup>24</sup>

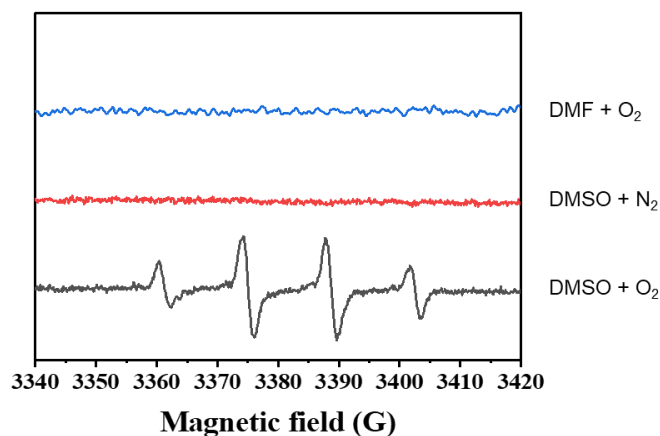

**Supplementary Figure 23.** Electron paramagnetic resonance (EPR) spectrum of the DMSO/O<sub>2</sub> promoted dehydrochlorination of **4c**. Reaction conditions: 1-phenylethyl chloride **4c** (0.5 mmol), DMSO (5 mL), O<sub>2</sub> or N<sub>2</sub>, 140 °C, 0.5 h. The crude reaction mixture (200  $\mu\text{L}$ ) was mixed with 5,5-dimethyl-1-pyrroline N-oxide (DMPO, 3 M in DMSO, 200  $\mu\text{L}$ ) and an EPR spectrum was recorded at room temperature. An EPR signal ( $g_0 = 2.007$ ) corresponding to DMPO- $\cdot\text{OH}$  was identified from the reaction of O<sub>2</sub>, DMSO and **4c**, confirming the formation of hydroxyl radicals during the reaction.

## Supplementary Information

### a. Radical trapping with TEMPO

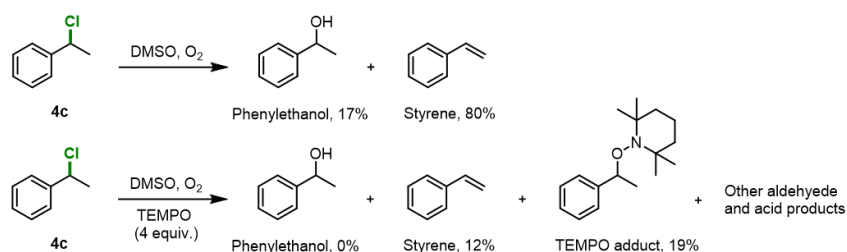

### b. ESI-MS spectrum of TEMPO adduct

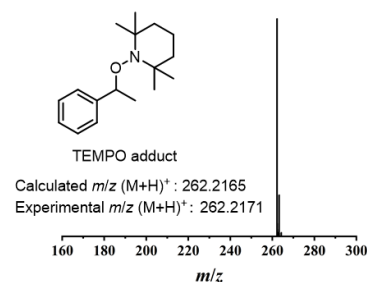

### c. <sup>1</sup>H NMR spectrum of TEMPO adduct

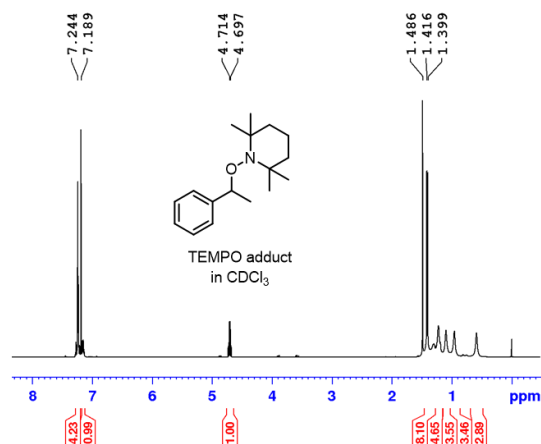

### d. <sup>13</sup>C NMR spectrum of TEMPO adduct

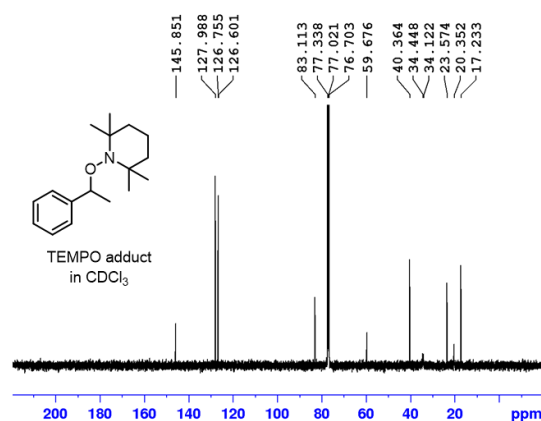

**Supplementary Figure 24.** Radical trapping experiments. Radical trapping with 4 equiv. 2,2,6,6-tetramethylpiperidin-1-yl)oxyl (TEMPO). Reaction conditions are the same those reported in Extended Data Fig. 2, entry 4. The TEMPO radical adduct was isolated by silica gel chromatography (hexane was used as the mobile phase). (b) ESI-MS of the TEMPO radical adduct. (c) <sup>1</sup>H and (d) <sup>13</sup>C NMR spectra of the TEMPO radical adduct.

## Supplementary Information

### a. Radical clock experiment

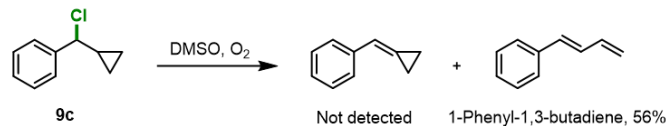

### b. EI-MS spectrum of 1-phenyl-1,3-butadiene

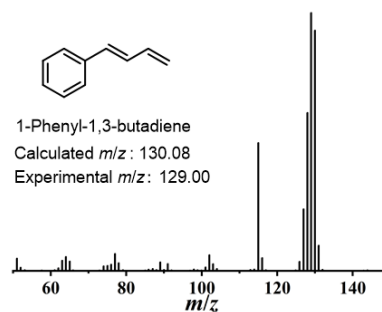

### c. <sup>1</sup>H NMR spectrum of 1-phenyl-1,3-butadiene

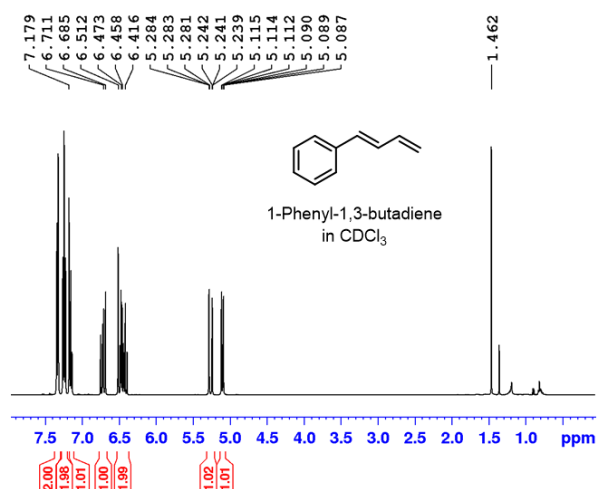

### d. <sup>13</sup>C NMR spectrum of 1-phenyl-1,3-butadiene

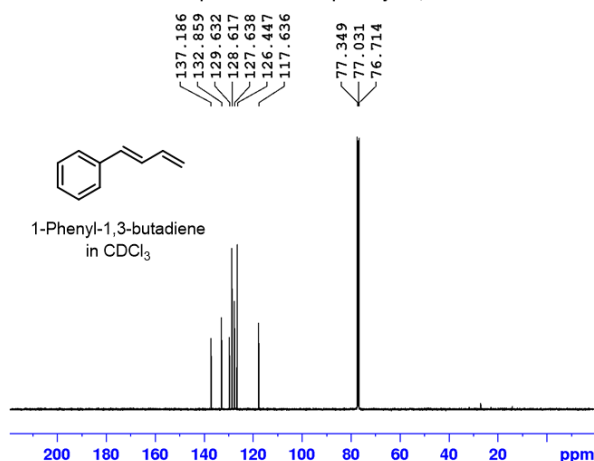

**Supplementary Figure 25.** Radical clock experiment. (a) Radical clock experiment employing (chloro(cyclopropyl)methyl)benzene **9c** as substrate. Reaction conditions are the same as those reported in Extended Data Fig. 2, entry 4. 1-Phenyl-1,3-butadiene was isolated as the main product by silica gel chromatography (hexane was used as the mobile phase). (b) EI-MS of 1-phenyl-1,3-butadiene. (c) <sup>1</sup>H (d) <sup>13</sup>C NMR spectra of 1-phenyl-1,3-butadiene.

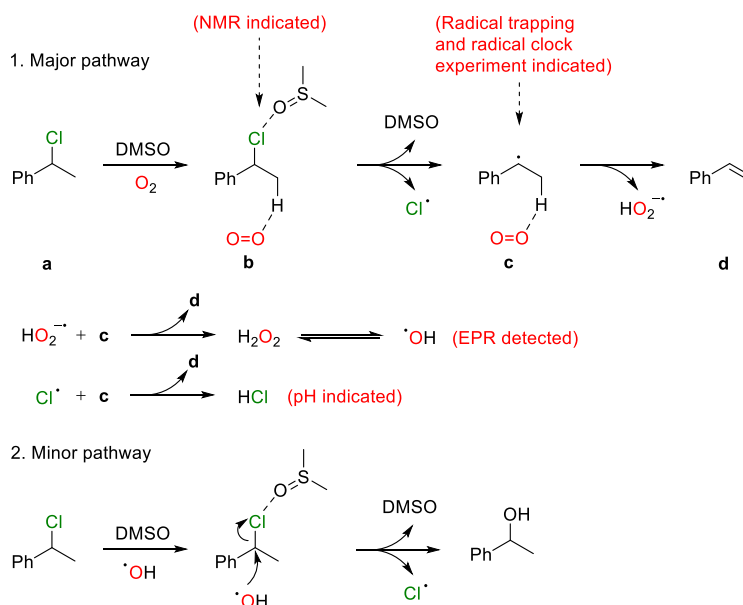

**Supplementary Figure 26.** Proposed pathways for the DMSO/O<sub>2</sub> catalyzed dechlorination reaction (**a** to **d**). 1,2-Elimination is the major pathway for the thermal dehydrochlorination (>300 °C) of PVC to produce HCl and polyenes.<sup>10, 13, 17, 19, 25-26</sup> In the reaction reported here, DMSO<sup>27</sup> and O<sub>2</sub><sup>25-26, 28</sup> act as electrophilic Cl<sup>-</sup> and nucleophilic H<sup>+</sup> adsorbents, respectively. DMSO is expected to activate the chloride atom in **a** (confirmed by NMR spectroscopy, see Supplementary Figure 22) and O<sub>2</sub> may simultaneously adsorb the β-H, to generate styrene and a Cl<sup>•</sup> radical (Major pathway),<sup>25-26</sup> evidenced by the dehydrochlorination product, styrene, not being observed in the absence of O<sub>2</sub> or DMSO (Extended Data Fig. 2, entries 5-7). In addition, O<sub>2</sub> converts into a superoxide radical and the generation of highly active Cl<sup>•</sup> radicals and superoxide radicals propagate the continuous dehydrochlorination of **a**, giving HCl (indicated by a decrease in pH, see Supplementary Figure 21) and (hydroxyl radicals, indicated by EPR spectroscopy, see Supplementary Figure 23). A dechloro-hydroxylation product, 1-phenylethanol, was also detected in low yield irrespective of whether the reaction was performed in the absence or presence of O<sub>2</sub> (Extended Data Fig. 2, entries 3-5). A tentative mechanism involving nucleophilic attack of hydroxyl radicals is shown (Minor pathway).<sup>29-31</sup>

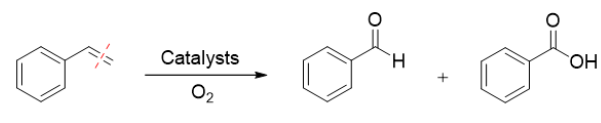

| Entry | Catalyst                     | Benzaldehyde (%) | Benzoic acid (%) |
|-------|------------------------------|------------------|------------------|
| 1     |                              | 0                | 0                |
| 2     | 20 mol% NaNO <sub>3</sub>    | 5                | 93               |
| 3     | 20 mol% CuO                  | 8                | 4                |
| 4     | 20 mol% Cu(OAc) <sub>2</sub> | 3                | 0                |
| 5     | 5 mol% PdO                   | 14               | 0                |

**Supplementary Figure 27.** Testing the activity of Cu, Pd and NaNO<sub>3</sub> in C=C bond activation. Reaction conditions: styrene (0.25 mmol), catalyst, biphenyl (0.2 mmol, internal standard), DMSO (2 mL), O<sub>2</sub> (3 bar), 140 °C, 4 h. NaNO<sub>3</sub> is the most efficient catalyst for C=C bond activation.

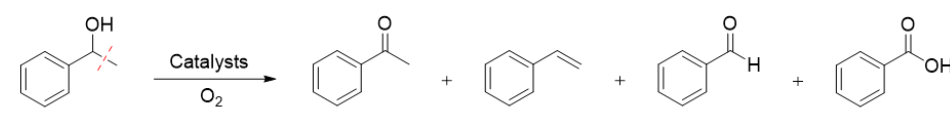

| Entry | Catalyst                     | Acetophenone (%) | Styrene (%) | Benzaldehyde (%) | Benzoic acid (%) |
|-------|------------------------------|------------------|-------------|------------------|------------------|
| 1     |                              | 2                | 1           | 0                | 0                |
| 2     | 20 mol% NaNO <sub>3</sub>    | 1                | 0           | 5                | 90               |
| 3     | 20 mol% CuO                  | 10               | 0           | 0                | 0                |
| 4     | 20 mol% Cu(OAc) <sub>2</sub> | 7                | 0           | 0                | 0                |
| 5     | 5 mol% PdO                   | 90               | 2           | 2                | 3                |

**Supplementary Figure 28.** Testing the activity of Cu, Pd and NaNO<sub>3</sub> in C(OH)–C bond activation. Reaction conditions: 1-phenylethanol (0.25 mmol), catalyst, biphenyl (0.2 mmol, internal standard), DMSO (2 mL), O<sub>2</sub> (3 bar), 140 °C, 4 h. PdO promotes the oxidation of 1-phenylethanol to acetophenone.<sup>32-35</sup> However, NaNO<sub>3</sub> was found to be the most efficient catalyst for C(OH)–C bond activation, as reported previously.<sup>36</sup> The mechanism of NaNO<sub>3</sub> catalyzed C=C/C(OH)–C bond activation is described below.

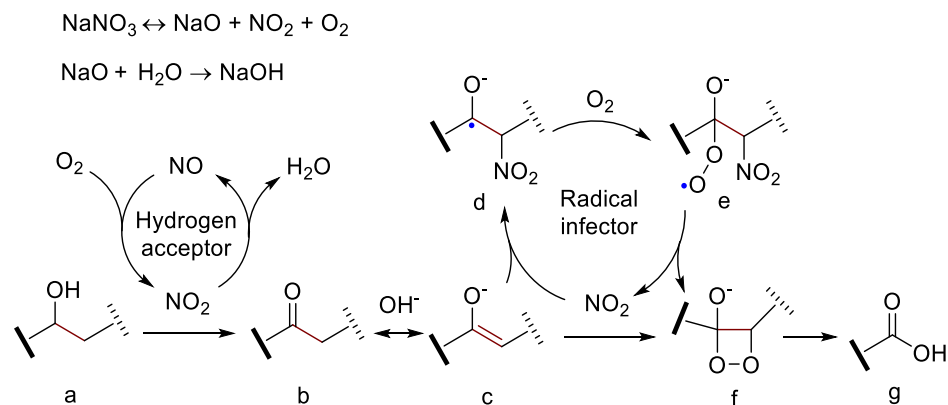

**Supplementary Figure 29.** Tentative reaction pathway for  $\text{NaNO}_3$  catalyzed  $\text{C}=\text{C}/\text{C}(\text{OH})-\text{C}$  bond activation of the alkene and alkanol intermediates.  $\text{NaNO}_3$  catalyzed  $\text{C}=\text{C}/\text{C}(\text{OH})-\text{C}$  bond activation was reported in previously.<sup>36</sup> Decomposition of  $\text{NaNO}_3$  provides  $\text{NO}_2$  gas and  $^-\text{OH}$  that catalyze the cleavage of  $\text{C}=\text{C}/\text{C}(\text{OH})-\text{C}$  bonds. Specifically, for the activation of  $\text{C}(\text{OH})-\text{C}$  bond,  $\text{NO}_2$  acts as hydrogen acceptor promoting the conversion of alcohol **a** to carbonyl **b**.  $^-\text{OH}$  promotes the tautomerization of **b** to enol **c**. The addition of a  $\text{NO}_2$  radical to enol **c** generates corresponding carbon centered radical **d**. Radical **d** may capture  $\text{O}_2$  resulting in the formation of peroxy radical intermediate **e**. Following the release of  $\text{NO}_2$  radical from **e**, dioxetane intermediate **f** is generated, which undergoes thermal cleavage yielding the carboxylic acid product **g**. The reaction pathway of  $\text{NaNO}_3$  catalyzed  $\text{C}=\text{C}$  bond activation is similar to the transformation of enol **c** to the carboxylic acid product **g**. Using chlorinated waste, alkene (dominant) and alkanol (minor) intermediates are formed, which can transfer into the carboxylic acid product (i.e. formic acid and other alkyl carboxylic acids) after the  $\text{NaNO}_3$  catalyzed cleavage of  $\text{C}=\text{C}/\text{C}(\text{OH})-\text{C}$  bonds. Formic acid can decompose into  $\text{CO}_x$  gas and  $\text{H}_2\text{O}$ , leading to the total mineralization of the hydrocarbon component.

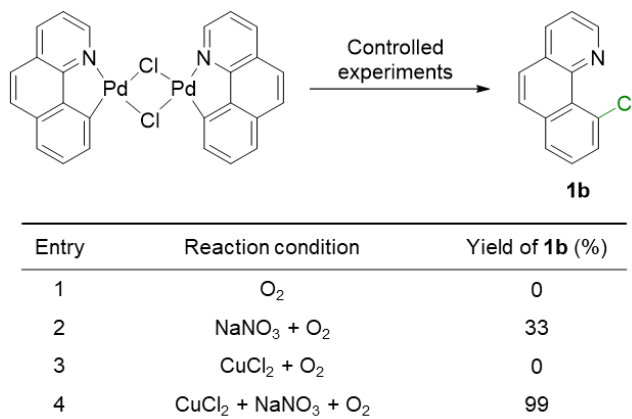

**Supplementary Figure 30.** Chlorinated product **1b** generated from model benzo[h]quinolinylnyl Pd(II) chloride intermediate. Reaction conditions: benzo[h]quinolinylnyl Pd(II) chloride (0.1 mmol),  $\text{CuCl}_2$  (20 mol%, 0.02 mmol),  $\text{NaNO}_3$  (20 mol%, 0.02 mmol), biphenyl (0.1 mmol), DMSO (2 mL),  $\text{O}_2$  (3 bar), 140 °C, 1 h. Only with the combination of the  $\text{CuCl}_2$  and  $\text{NaNO}_3$  catalysts, benzo[h]quinolinylnyl Pd(II) chloride affords the chlorinated product **1b** in near-quantitative yield.

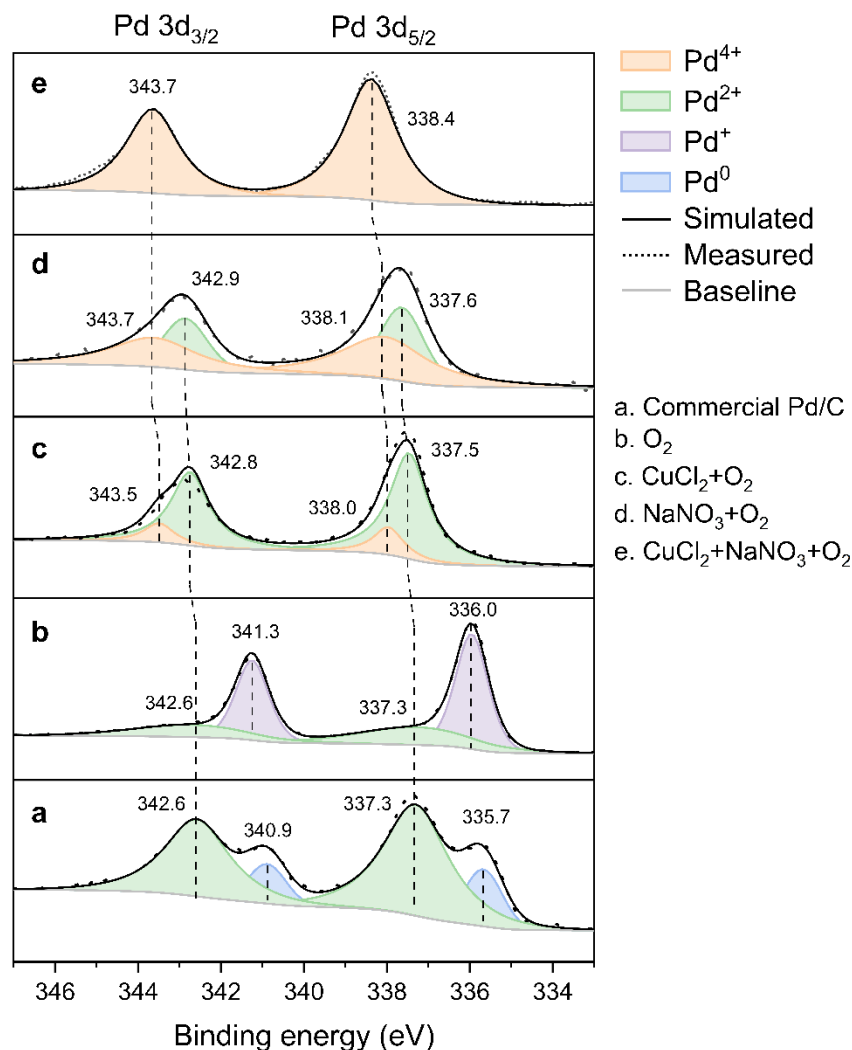

**Supplementary Figure 31.** X-ray photoelectron spectroscopy (XPS) of the Pd/C catalyst under different reaction conditions in the absence of a substrate. In order to monitor the evolution of the surface species, 10% Pd/C catalyst was used instead of PdO (Pd/C from Sigma-Aldrich has the same catalytic activity as PdO, see Supplementary Table 2, entry 14). After reaction, the Pd/C catalyst was purified by washing with water (3×10 mL), acetone (3×10 mL), ethyl acetate (3×10 mL) and diethyl ether (3×10 mL) and drying under vacuum (30 °C, 18 h) prior to XPS. **(a)** XPS of commercial 10% Pd/C under anaerobic conditions, peaks with binding energy values  $E_b$  (Pd3d<sub>5/2</sub> and Pd3d<sub>3/2</sub>) of 335.7 and 340.9 eV correspond to Pd<sup>0</sup> species and peaks with  $E_b$  (Pd3d<sub>5/2</sub> and Pd3d<sub>3/2</sub>) of 337.3 and 342.6 eV correspond to Pd<sup>2+</sup> species, indicating that the Pd/C catalyst is partially oxidized with PdO surface species. **(b)** XPS of the Pd/C catalyst after treatment under aerobic reactions (10% Pd/C (0.0125 mmol), DMSO (2 mL), O<sub>2</sub> (3 bar), 140 °C, 15 h), peaks corresponding to Pd<sup>0</sup> and Pd<sup>2+</sup> species nearly disappear and new peaks with  $E_b$  (Pd3d<sub>5/2</sub> and Pd3d<sub>3/2</sub>) at 336.0 and 341.3 eV appear, which may be attributed to Pd<sup>+</sup> species. Thus, the surface species on the Pd/C catalyst undergo synproportionation in O<sub>2</sub> rather than further oxidation. **(c)** XPS of the Pd/C catalyst after treatment under Cu catalyzed aerobic reaction conditions (Cu(NO<sub>3</sub>)<sub>2</sub>•3H<sub>2</sub>O (0.05 mmol), 10% Pd/C (0.0125 mmol), DMSO (2 mL), O<sub>2</sub> (3 bar), 140 °C, 15 h). Peaks with  $E_b$  (Pd3d<sub>5/2</sub> and Pd3d<sub>3/2</sub>) at 337.5 and 342.8 eV correspond to Pd<sup>2+</sup> species. The new component with highest  $E_b$  (Pd3d<sub>5/2</sub> and Pd3d<sub>3/2</sub>) at 338.0 and 343.5 eV may be assigned to Pd<sup>4+</sup> species. **(d)** XPS of the Pd/C catalyst following treatment under NaNO<sub>3</sub> catalyzed aerobic reaction conditions (NaNO<sub>3</sub> (0.05 mmol), 10% Pd/C (0.0125 mmol), DMSO (2 mL), O<sub>2</sub> (3 bar), 140 °C, 15 h). Peaks with  $E_b$  (Pd3d<sub>5/2</sub> and Pd3d<sub>3/2</sub>) at 337.6 and 342.9 eV correspond to Pd<sup>2+</sup> species.

## Supplementary Information

The new component with highest  $E_b$  ( $\text{Pd}3d_{5/2}$  and  $\text{Pd}3d_{3/2}$ ) at 338.1 and 343.7 eV corresponds to  $\text{Pd}^{4+}$  species. These results suggest that  $\text{CuCl}_2$  or  $\text{NaNO}_3$  act as redox mediator,<sup>37</sup> with  $\text{O}_2$  acting as the final oxidant to promote the full oxidation of  $\text{Pd}^0$  to  $\text{Pd}^{2+}$  species and partial oxidation of  $\text{Pd}^{2+}$  to  $\text{Pd}^{4+}$  species. (e) XPS of the Pd/C catalyst following treatment under aerobic reaction conditions in the presence of both  $\text{CuCl}_2$  and  $\text{NaNO}_3$  ( $\text{Cu}(\text{NO}_3)_2 \cdot 3\text{H}_2\text{O}$  (0.05 mmol), 10% Pd/C (0.0125 mmol),  $\text{NaNO}_3$  (0.05 mmol), DMSO (2 mL),  $\text{O}_2$  (3 bar), 140 °C, 15 h). Peaks indicative of  $\text{Pd}^0$  and  $\text{Pd}^{2+}$  species are not observed. The only component with highest  $E_b$  ( $\text{Pd}3d_{5/2}$  and  $\text{Pd}3d_{3/2}$ ) at 338.4 and 343.7 eV may be assigned  $\text{Pd}^{4+}$  species, indicating that using both  $\text{CuCl}_2$  and  $\text{NaNO}_3$  as redox mediators, oxidation of  $\text{Pd}^0$  and  $\text{Pd}^{2+}$  species to  $\text{Pd}^{4+}$  is favored. Pd(IV) species formed under the standard reaction conditions are consequently expected to be the key intermediates that afford C–Cl bonds via reductive elimination.<sup>38-39</sup> These results agree with the observation that the chlorination reaction cannot proceed without either Cu or  $\text{NaNO}_3$  catalyst (Extended Data Fig. 3).

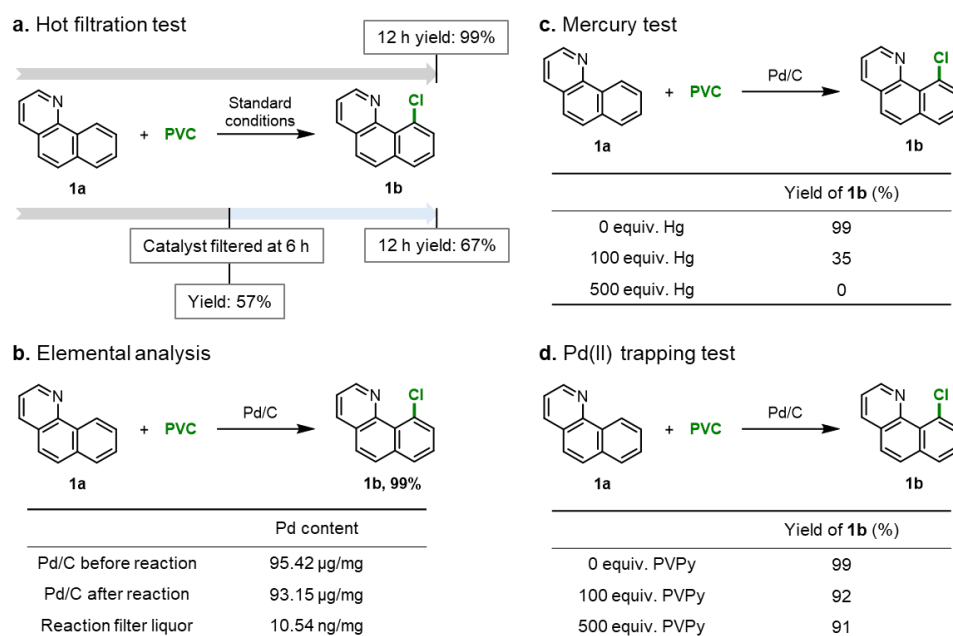

**Supplementary Figure 32.** Experiments to probe the nature of the active PdO catalyst. (a) Hot filtration test under the standard reaction conditions.<sup>40</sup> The hot reaction mixture was filtered to remove all heterogenous PdO catalyst after 6 h reaction, and the reaction was continued for a further 6 h, no further reaction was observed, suggesting all active heterogenous species were removed by filtration. This observation is consistent with the homogeneous Pd catalysts studied being less active than the heterogenous Pd catalysts studied (see Supplementary Figure 2 and Supplementary Table 2). (b) Elemental analysis of the heterogenous Pd/C catalyst and liquid reaction mixture. In order to determine if the heterogenous Pd catalyst leaches, Pd/C catalyst was used (Pd/C transforms into PdO/C under the reaction conditions and shows the same catalytic activity as PdO, see Supplementary Table 2). Inductively Coupled Plasma (ICP) mass spectrometry was used to determine the Pd content of the reaction mixture before and after reaction, as well as the filtered solution after reaction, suggesting very little leaching of Pd takes place. (c) Mercury poisoning test. Pd/C was used instead of PdO. Mercury acts as a selective poison for nanoparticle catalysts to form a catalytically inactive Hg amalgam. Addition of Hg was found to inhibit the reaction, suggesting that the catalyst is not homogeneous.<sup>41</sup> (d) Pd(II) trapping test using insoluble poly(4-vinylpyridine) (PVPy).<sup>42</sup> The pyridine ligands in PVPy strongly coordinates to homogeneous Pd species, trapping them within the insoluble polymer. Since PVPy does not suppress the reaction it suggests that homogeneous Pd species are not the active catalyst.<sup>42</sup>

## Supplementary Information

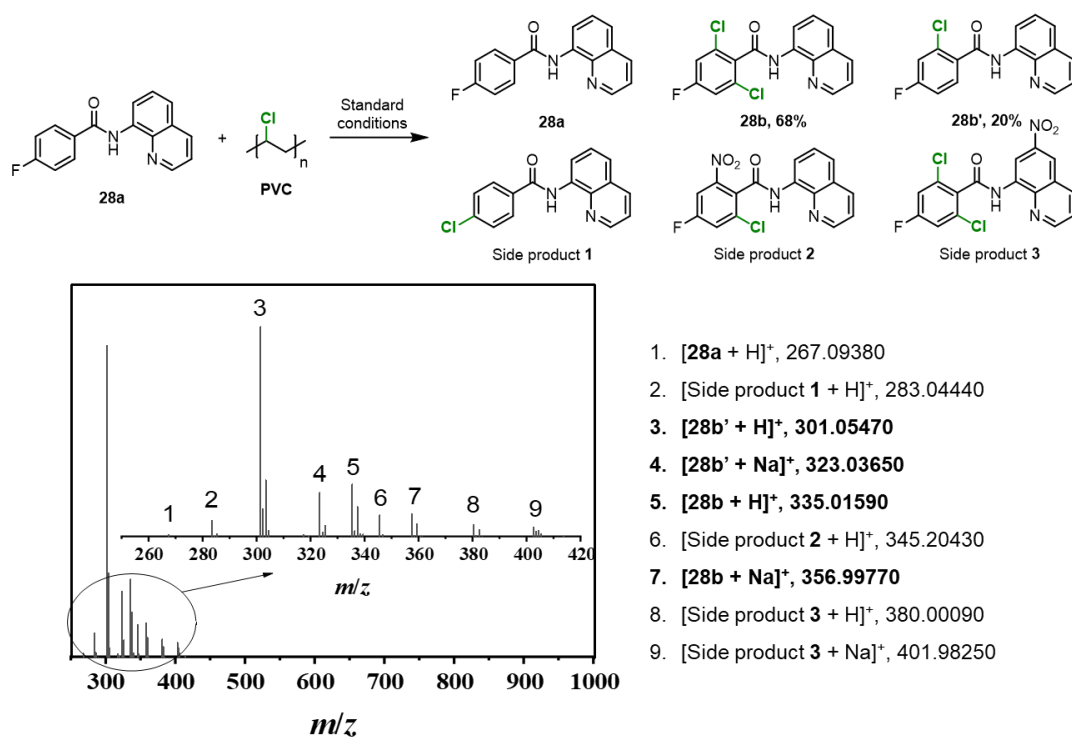

**Supplementary Figure 33.** Electrospray ionization mass spectrometry (ESI-MS) of the reaction mixture after filtration. In order to obtain strong mass signals **28a** was used as the substrate. Heterogeneous PdO was filtered and the DMSO reaction mixture solution was diluted with THF (DMSO : THF, 1 : 20, v/v). Pd species were not detected. Peak assignments are listed and correspond to the substrate and products.

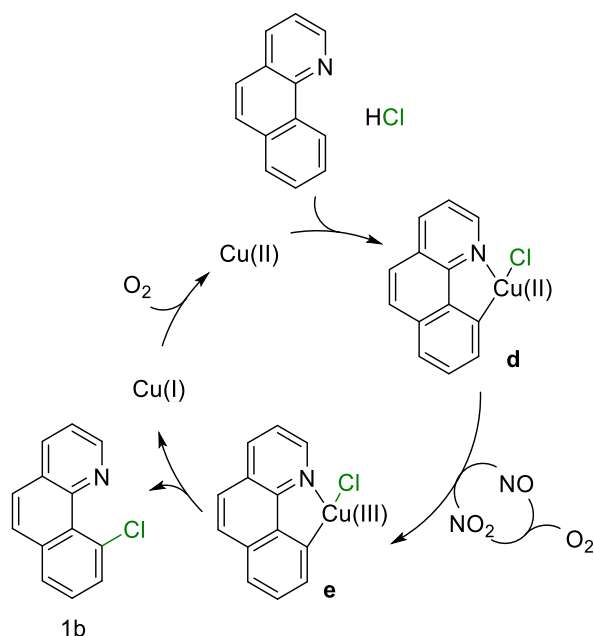

**Supplementary Figure 34.** Proposed reaction pathway for Cu catalyzed C–H chlorination with NaNO<sub>3</sub> promoter. Without Pd catalyst, Cu also can catalyze C–H chlorination with NaNO<sub>3</sub> as promoter, but less efficiently (Extended Data Fig. 3, entry 5). The Cu catalyst also will activate C–H bond of substrate **1a** to generate the Cu(II) complex **d**.<sup>43–45</sup> After oxidation with NO<sub>2</sub> (derived from the decomposition of NaNO<sub>3</sub>), the Cu(III) complex **e** is formed. Although less favorable, Cu(III) complex **e** can also undergo reductive elimination to afford product **1b**.<sup>45</sup>

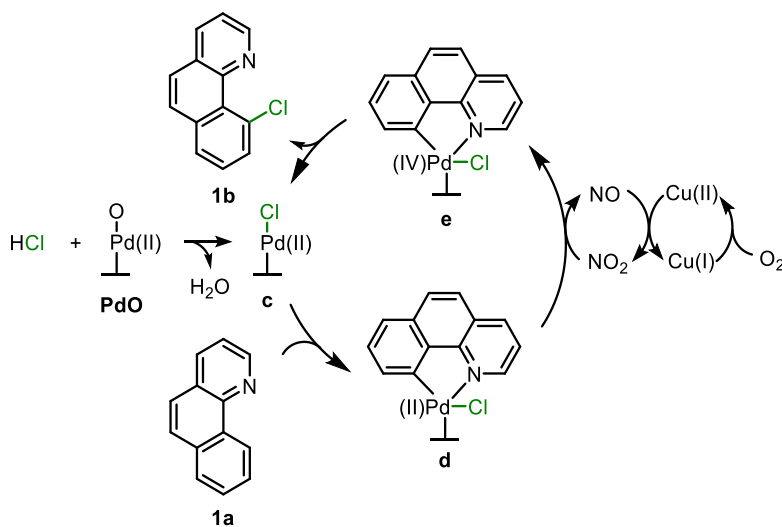

**Supplementary Figure 35.** Proposed reaction pathway for PdO catalyzed C–H chlorination with Cu and NaNO<sub>3</sub> promoter. Using HCl as chlorination reagent, PdO, Cu(NO<sub>3</sub>)<sub>2</sub>, NaNO<sub>3</sub> and O<sub>2</sub> are indispensable for the chlorination of 7,8-benzoquinoline **1a** to 10-chlorobenzoquinoline **1b**. A bimetallic pathway might be in operation as reported elsewhere for catalytic C–C or C–X bond formation.<sup>46–47</sup> Ion exchange of HCl with PdO generates the Pd(II) intermediate **c**.<sup>48</sup> The Pd catalyst **c** will activate C–H bond of substrate **1a** to generate the Pd(II) complex **d**.<sup>43–45</sup> After oxidation with Cu and NO<sub>2</sub> (derived from the decomposition of NaNO<sub>3</sub>), the Pd(IV) complex **e** is formed.<sup>45</sup> Reductive elimination of Pd(IV) complex **e** gives product **1b**.<sup>45</sup>

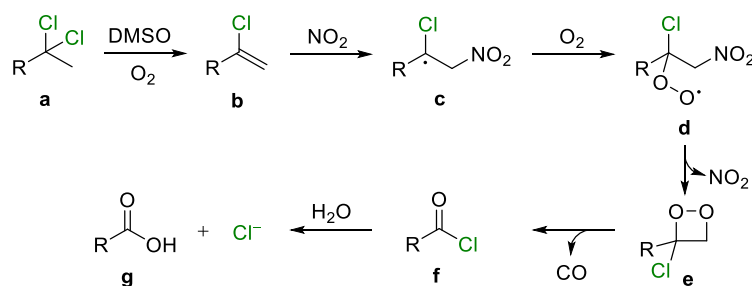

**Supplementary Figure 36.** Proposed pathway for the dechlorination and depolymerization of PVDC-type model compounds, i.e. containing two Cl atoms at the  $\alpha$ -position. The Cl atoms undergo DMSO/O<sub>2</sub> catalyzed dechlorination to afford alkene intermediate **b** (see Supplementary Figure 26 for further details), followed by NaNO<sub>3</sub> catalyzed C=C bond cleavage and depolymerization to generate CO and acyl chloride **f** (Supplementary Figure 29). Hydrolysis of acyl chloride **f** affords Cl<sup>-</sup> and carboxylic acid **g**.

## Life cycle assessment (LCA)

### Methods

The Life Cycle Assessment (LCA) approach implemented is a gate-to-gate analysis exclusively focused on the manufacturing phase of aryl chlorides. The production process for each scenario is synthetically represented in Supplementary Figs. 37-40. Analysis starts from the acquisition of raw materials, encompassing the synthetic process of aryl chlorides and it ends with waste disposal. LCA using PVC as chlorination reagent (scenario 1) is compared with a typical chlorination method using N-chlorosuccinimide (NCS) as chlorination reagent (scenario 2),<sup>49</sup> affording 2-(2-chloro-5-nitrophenyl)pyridine **12b**, an intermediate in the synthesis of the anticancer drug vismodegib. LCA of this work (scenario 3) is also compared with electrochemical method using PVC as chlorination reagent,<sup>50</sup> for the generation of 1-(2-chlorophenyl)-pyrazole **19b** (scenario 4). LCA was performed using OpenLCA 1.11, with the Ecoinvent v3.8 database.<sup>51</sup> The scope of the LCA is to compare the 100-year global warming potential (GWP 100a) for the production of aryl chlorides of using PVC waste as chlorination reagent with other chlorination methods. Impact assessment is based on IPCC 2013 GWP 100a.<sup>50, 52</sup> Reaction details and LCA results are summarized in Supplementary Tables S5-7.

### Assumptions

1. All scenarios are scaled to afford 1 kg of product.
2. In all scenarios, reactions are performed in sealed batch reactors and the energy consumption of each scenario was assumed to be constant.
3. In scenario 1 the equivalent PVC is considered to be incinerated, i.e. if the PVC is not used as a chlorination reagent.
4. In scenario 3 unreacted PVC is incinerated and the impact of DEHP is not included.
5. In scenarios 2 and 4 the production of valuable CO is not included.
6. Repeated reagents, solvents, energy consumption during product isolation, equipment required and waste effluent treatment and disposal, are deemed constant and are therefore not included.

## Supplementary Information

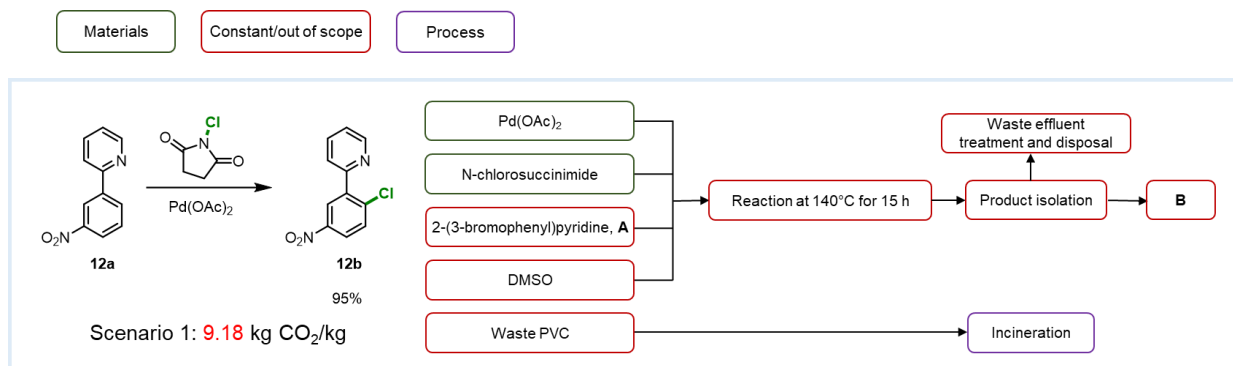

Supplementary Figure 37. LCA diagram for scenario 1.

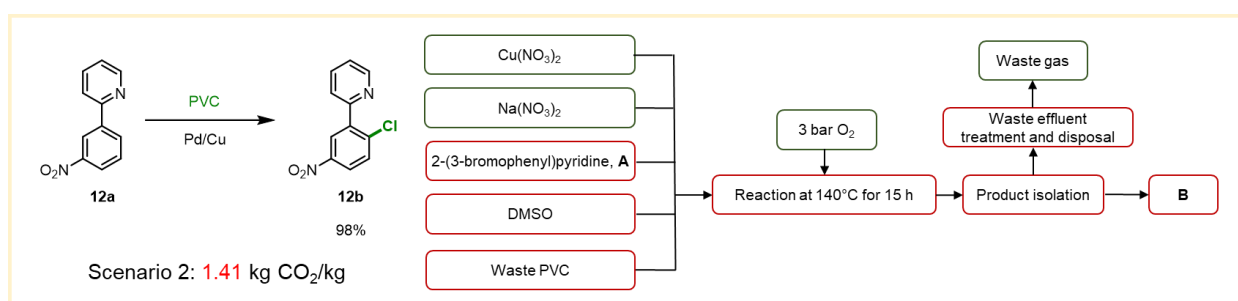

Supplementary Figure 38. LCA diagram for scenario 2.

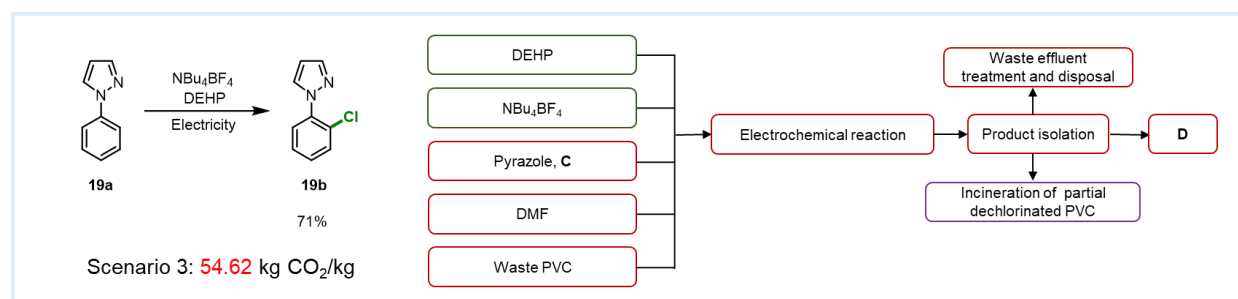

Supplementary Figure 39. LCA diagram for scenario 3.

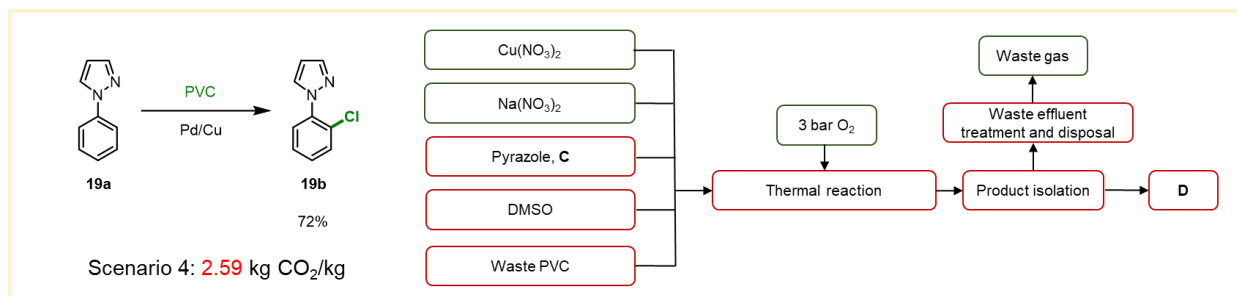

Supplementary Figure 40. LCA diagram for scenario 4.

Supplementary Table 5. Reaction details of scenarios 1-4.

## Supplementary Information

| Scenario                                                                           | Substrate            | Product              | Materials                                                                                                                                                                  | Yield (%) | Source    |
|------------------------------------------------------------------------------------|----------------------|----------------------|----------------------------------------------------------------------------------------------------------------------------------------------------------------------------|-----------|-----------|
| 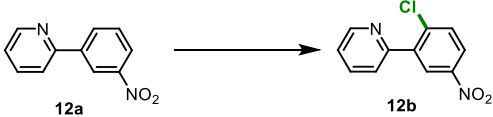 |                      |                      |                                                                                                                                                                            |           |           |
| 1                                                                                  | <b>12a</b> (0.90 kg) | <b>12b</b> (1.00 kg) | Pd(OAc) <sub>2</sub> (5 mol%, 0.05 kg), N-chlorosuccinimide (1.5 equiv., 0.90 kg)                                                                                          | 95        | Ref. 7    |
| 2                                                                                  | <b>12a</b> (0.87 kg) | <b>12b</b> (1.00 kg) | PVC water pipe (1.5 equiv., 0.27 kg), Cu(NO <sub>3</sub> ) <sub>2</sub> •3H <sub>2</sub> O (20 mol%, 0.21 kg), PdO (5 mol%, 0.03 kg), NaNO <sub>3</sub> (20 mol%, 0.07 kg) | 98        | This work |
|  |                      |                      |                                                                                                                                                                            |           |           |
| 3                                                                                  | <b>19a</b> (1.14 kg) | <b>19b</b> (1.00 kg) | PVC (~8 equiv., 3.95 kg), NBu <sub>4</sub> BF <sub>4</sub> (~7.3 equiv., 5.15 kg), DEHP (1 equiv., 3.04 kg)                                                                | 71        | Ref. 8    |
| 4                                                                                  | <b>19a</b> (1.12 kg) | <b>19b</b> (1.00 kg) | PVC water pipe (1.5 equiv., 0.73 kg), Cu(NO <sub>3</sub> ) <sub>2</sub> •3H <sub>2</sub> O (20 mol%, 0.37 kg), PdO (5 mol%, 0.05 kg), NaNO <sub>3</sub> (20 mol%, 0.13 kg) | 72        | This work |

Supplementary Table 6. LCA results for scenarios 1-2.

| Item                                         | Impact<br>(kg CO <sub>2</sub> per<br>eq/kg) | Scenario 1          |                                                     | Scenario 2              |                                                     |
|----------------------------------------------|---------------------------------------------|---------------------|-----------------------------------------------------|-------------------------|-----------------------------------------------------|
|                                              |                                             | <i>Amounts (kg)</i> | <i>Impact<br/>(kg CO<sub>2</sub> per<br/>eq/kg)</i> | <i>Amounts<br/>(kg)</i> | <i>Impact<br/>(kg CO<sub>2</sub> per<br/>eq/kg)</i> |
| <i>Materials production</i>                  |                                             |                     |                                                     |                         |                                                     |
| N-chlorosuccinimide                          | 4.59                                        | 0.90                | 4.13                                                | 0                       | 0                                                   |
| Palladium(II) acetate                        | 92.97                                       | 0.05                | 4.65                                                | 0                       | 0                                                   |
| Copper(II) nitrate                           | 4.50                                        | 0                   | 0                                                   | 0.21                    | 0.95                                                |
| Sodium nitrate                               | 0.52                                        | 0                   | 0                                                   | 0.07                    | 0.04                                                |
| Oxygen                                       | 1.07                                        | 0                   | 0                                                   | 0.02                    | 0.02                                                |
| <i>Distribution and use life/end of life</i> |                                             |                     |                                                     |                         |                                                     |
| PVC incineration                             | 1.47                                        | 0.27                | 0.40                                                | 0                       | 0                                                   |
| CO <sub>2</sub> from reaction                | 1                                           | 0                   | 0                                                   | 0.40                    | 0.40                                                |

|                                              |             |             |
|----------------------------------------------|-------------|-------------|
| <b>LCA–GWP (kg CO<sub>2</sub> per eq/kg)</b> | <b>9.18</b> | <b>1.41</b> |
|----------------------------------------------|-------------|-------------|

**Supplementary Table 7.** LCA results for scenarios 3-4.

| Item                                     | Impact<br>(kg CO <sub>2</sub> per<br>eq/kg) | Scenario 3      |                                             | Scenario 4      |                                             |
|------------------------------------------|---------------------------------------------|-----------------|---------------------------------------------|-----------------|---------------------------------------------|
|                                          |                                             | Amounts<br>(kg) | Impact<br>(kg CO <sub>2</sub> per<br>eq/kg) | Amounts<br>(kg) | Impact<br>(kg CO <sub>2</sub> per<br>eq/kg) |
| Materials production                     |                                             |                 |                                             |                 |                                             |
| DEHP                                     | 802.39                                      | 0               | 0                                           | 0               | 0                                           |
| NBu <sub>4</sub> BF <sub>4</sub>         | 9.48                                        | 5.15            | 48.82                                       | 0               | 0                                           |
| Copper(II) nitrate                       | 4.50                                        | 0               | 0                                           | 0.37            | 1.67                                        |
| Sodium nitrate                           | 0.52                                        | 0               | 0                                           | 0.14            | 0.07                                        |
| Oxygen                                   | 1.07                                        | 0               | 0                                           | 0.02            | 0.02                                        |
| Distribution and use<br>life/end of life |                                             |                 |                                             |                 |                                             |
| PVC incineration                         | 1.47                                        | 3.95            | 5.80                                        | 0               | 0                                           |
| CO <sub>2</sub> from reaction            | 1                                           | 0               | 0                                           | 0.83            | 0.83                                        |
| LCA–GWP (kg CO <sub>2</sub> per eq/kg)   |                                             | 54.62           |                                             | 2.59            |                                             |

## Supplementary Information

### NMR spectra

#### Substrate

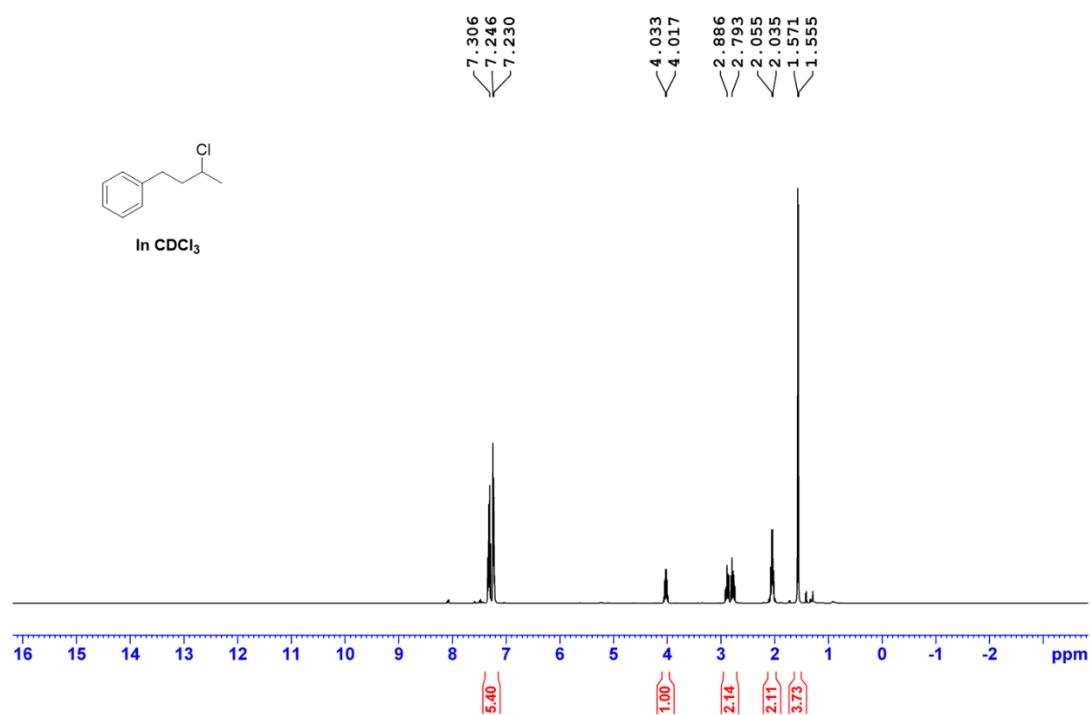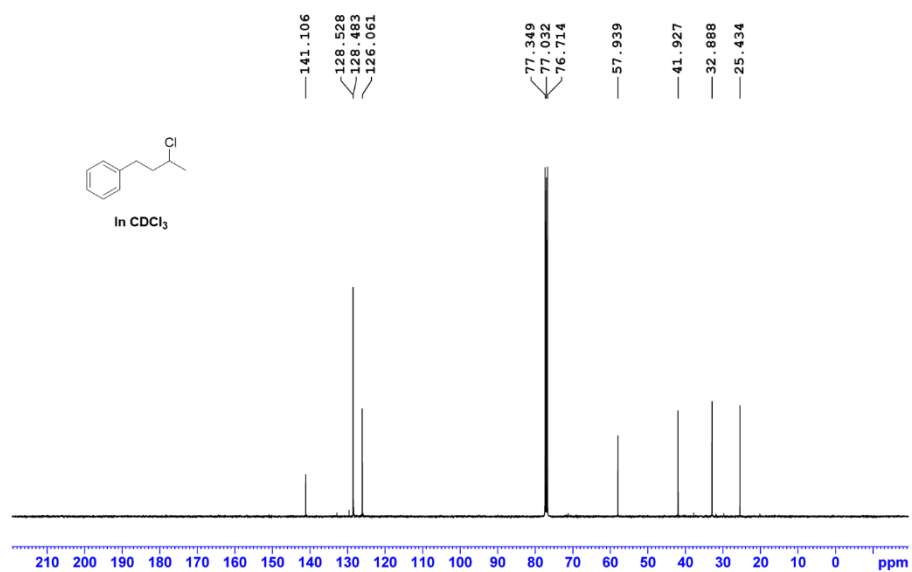

# Supplementary Information

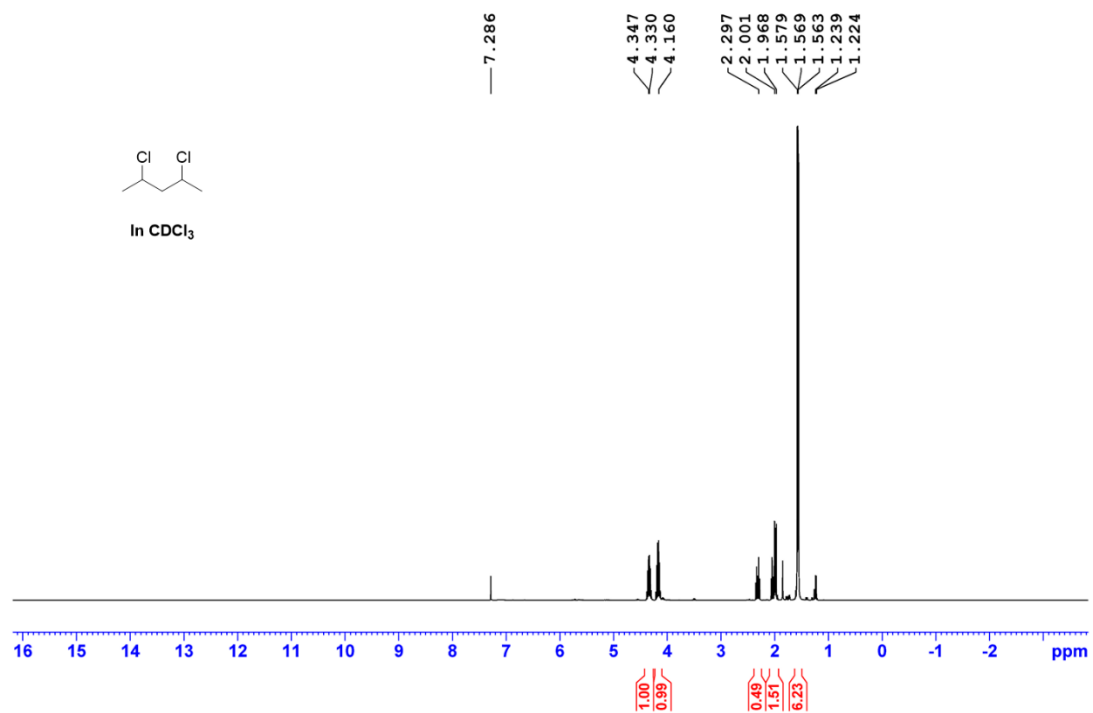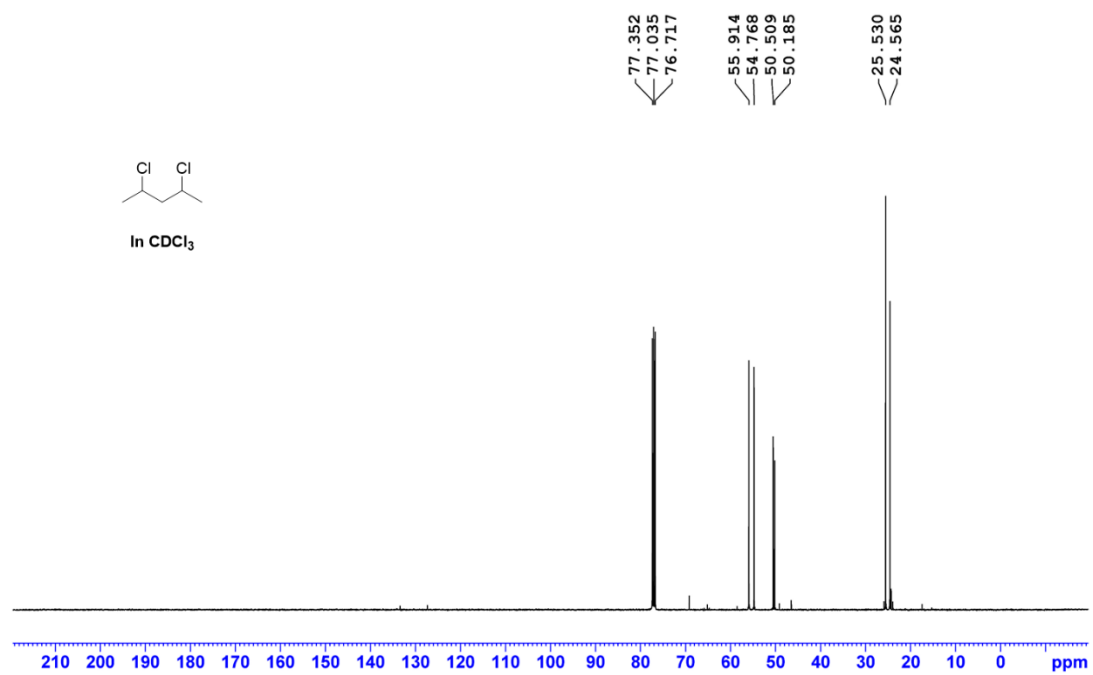

Supplementary Information

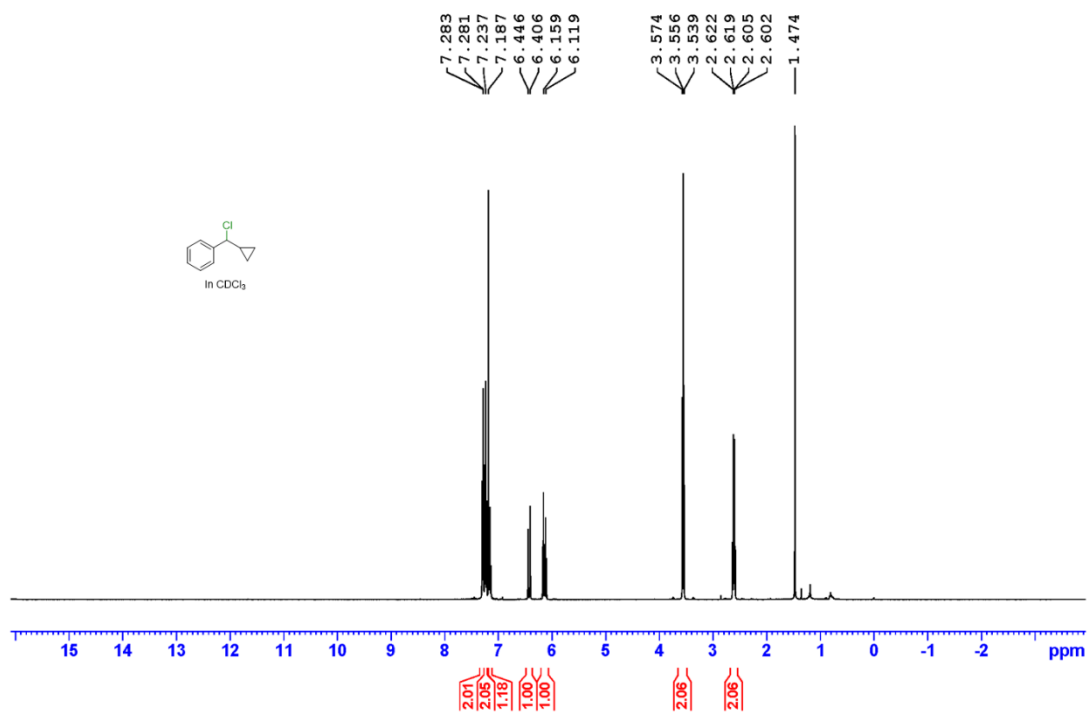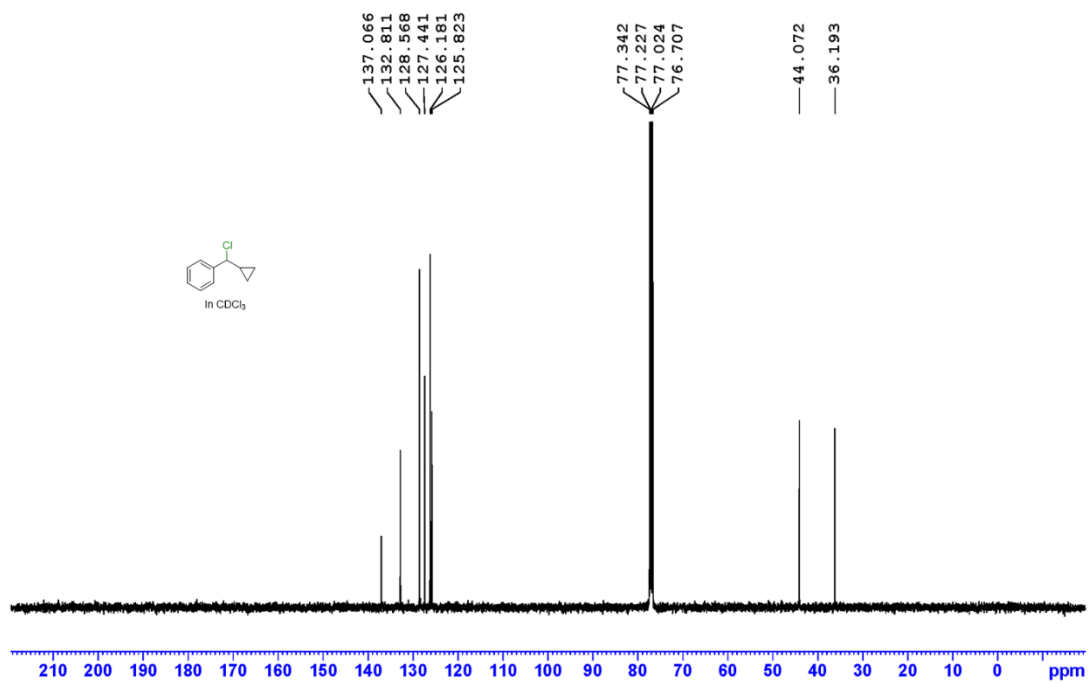

# Supplementary Information

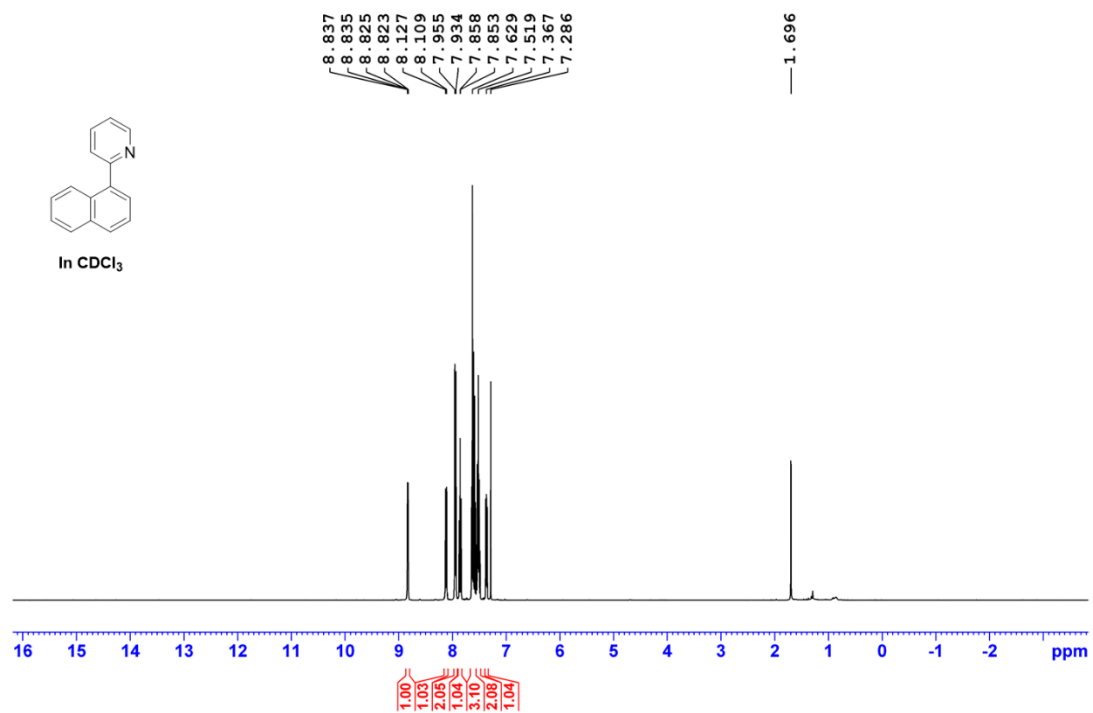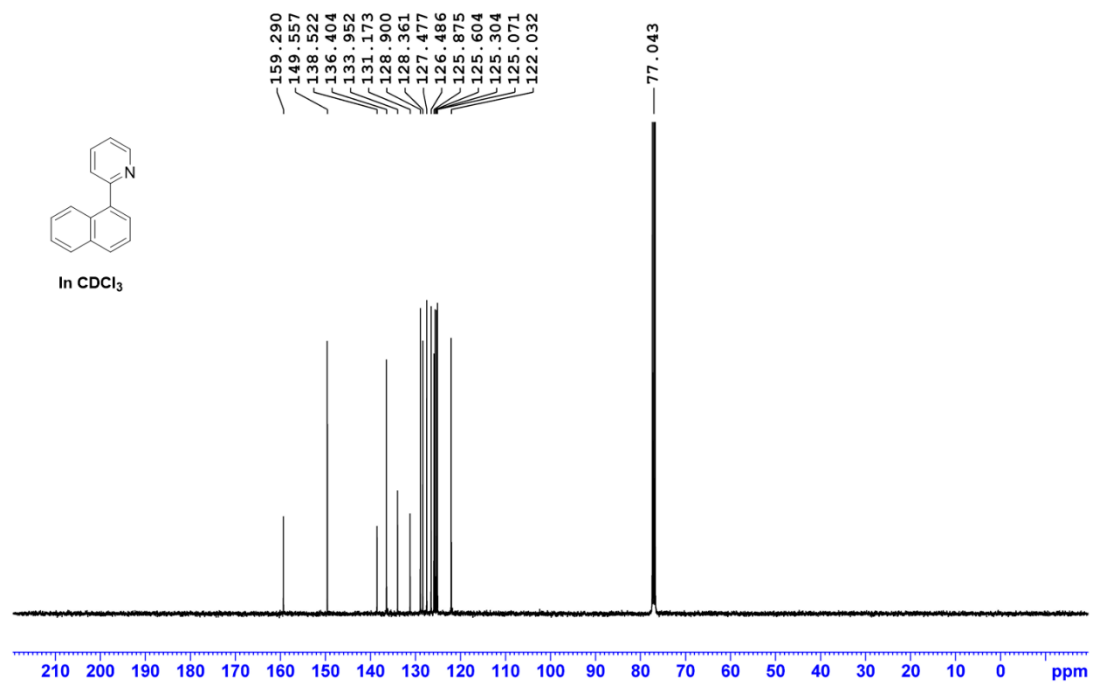

# Supplementary Information

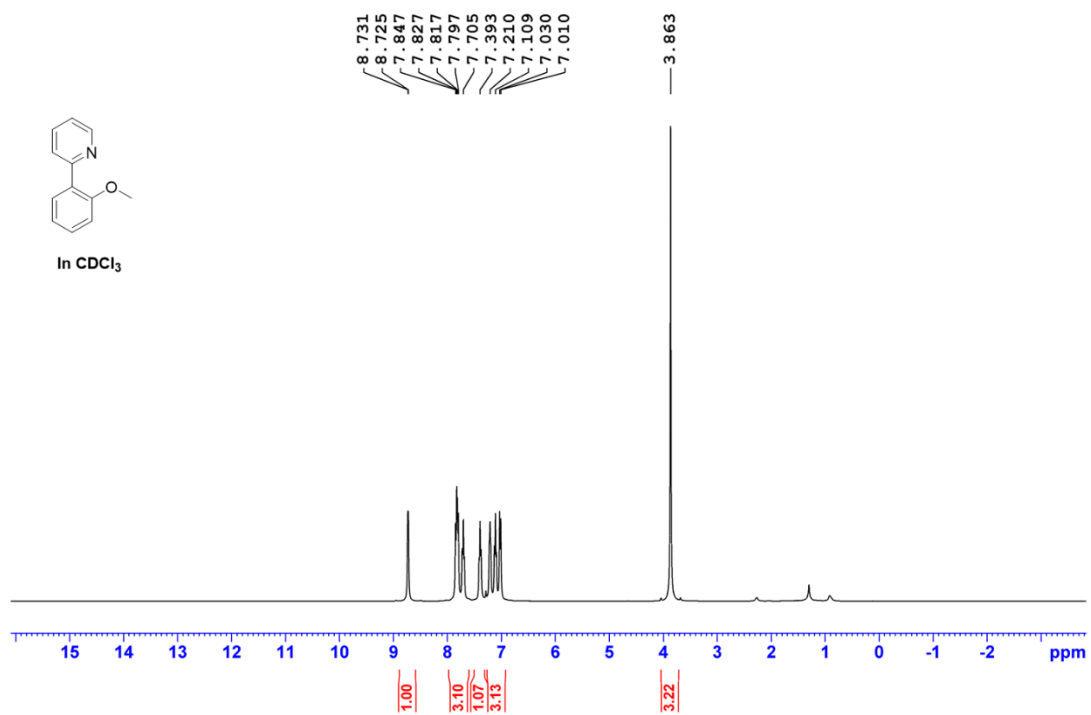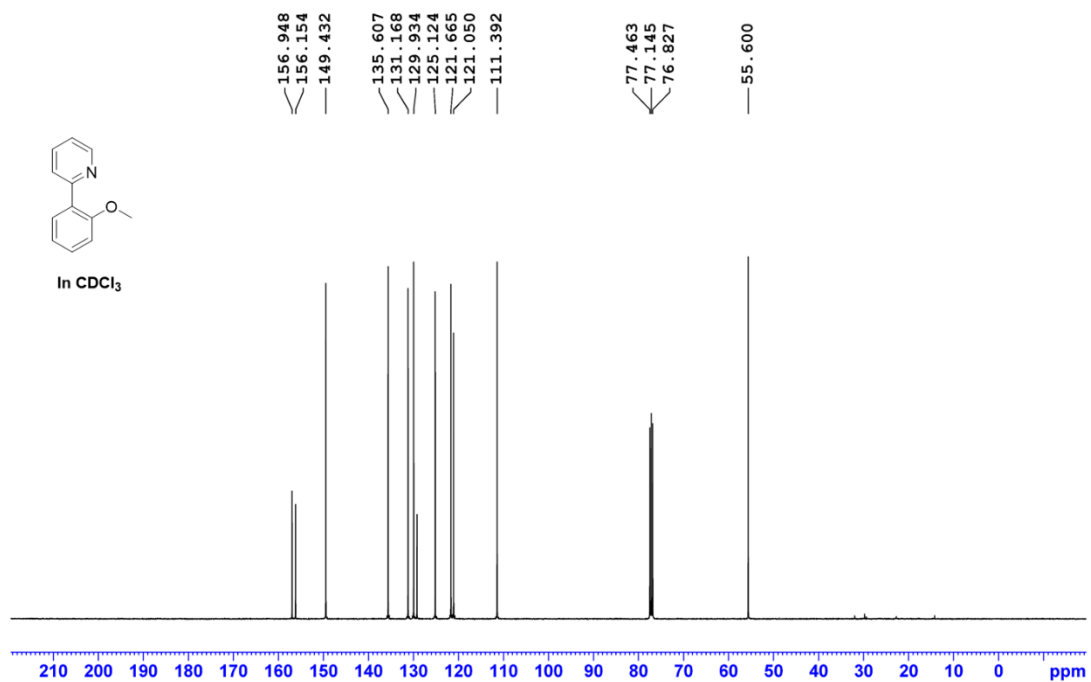

# Supplementary Information

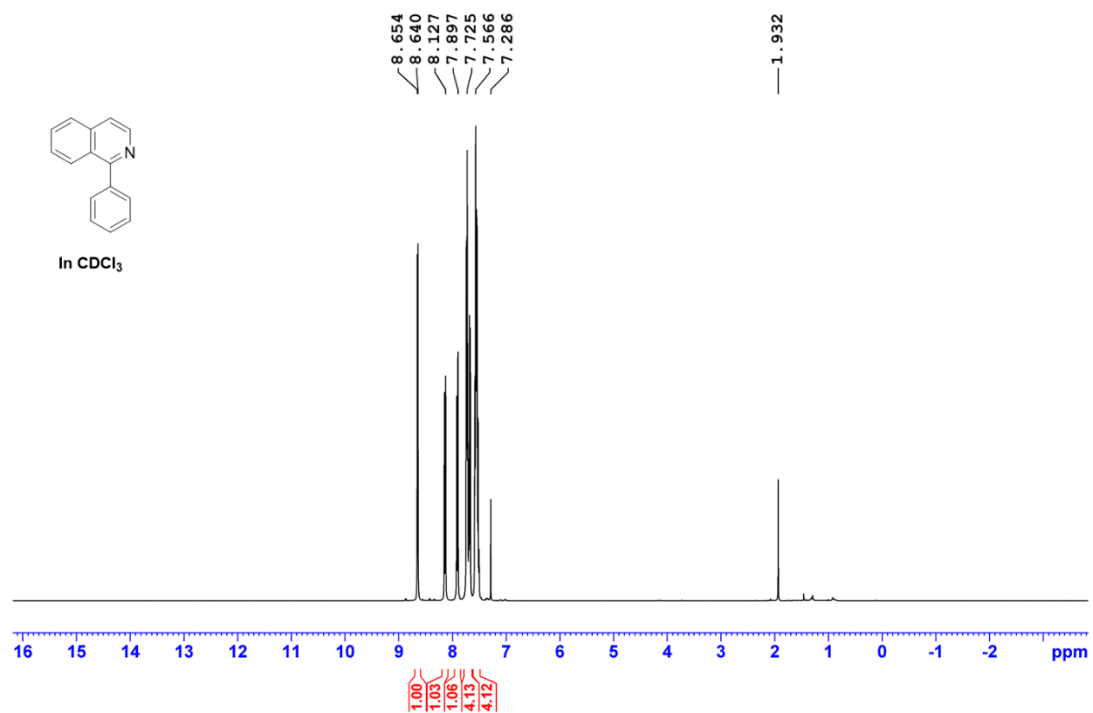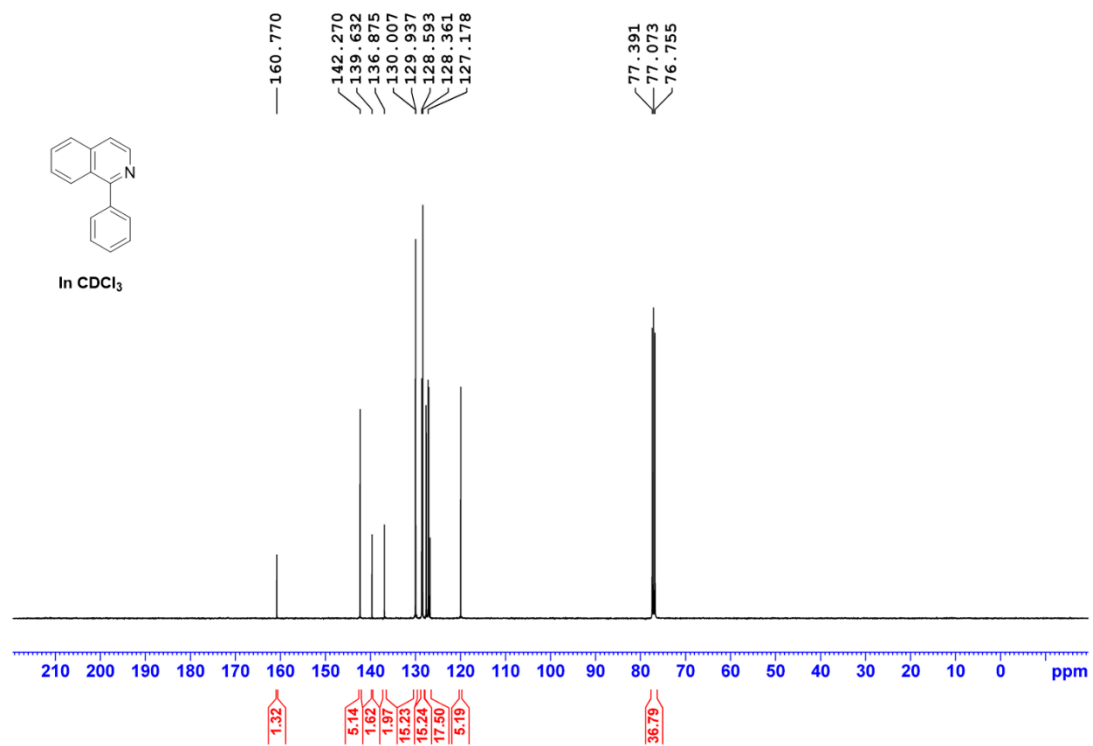

# Supplementary Information

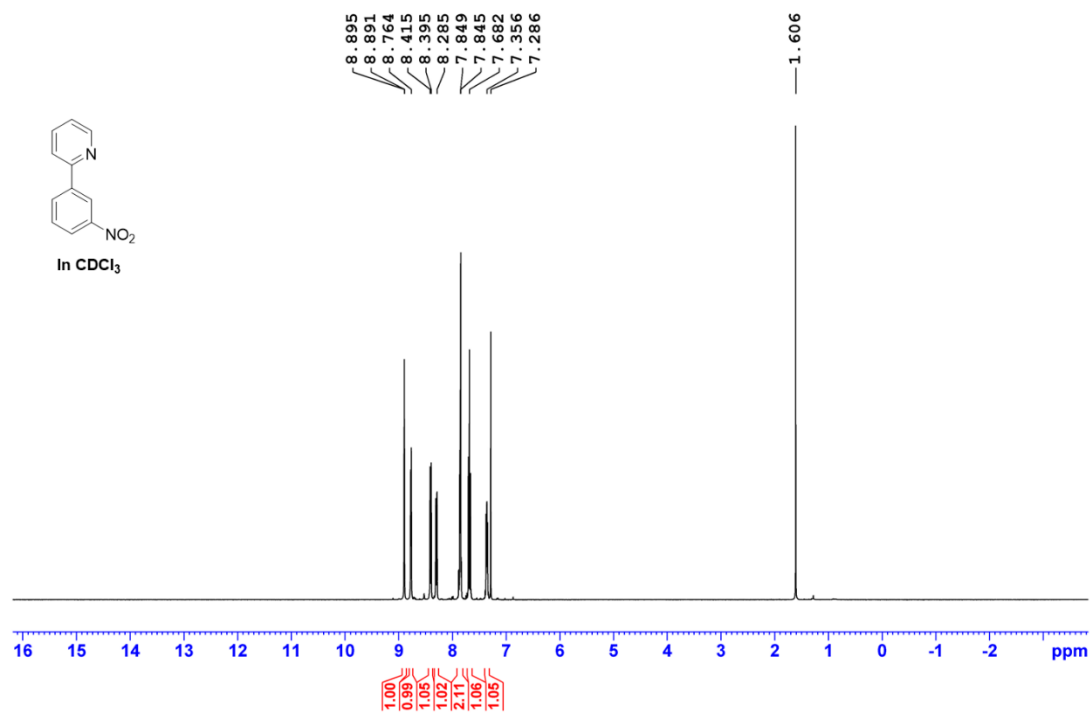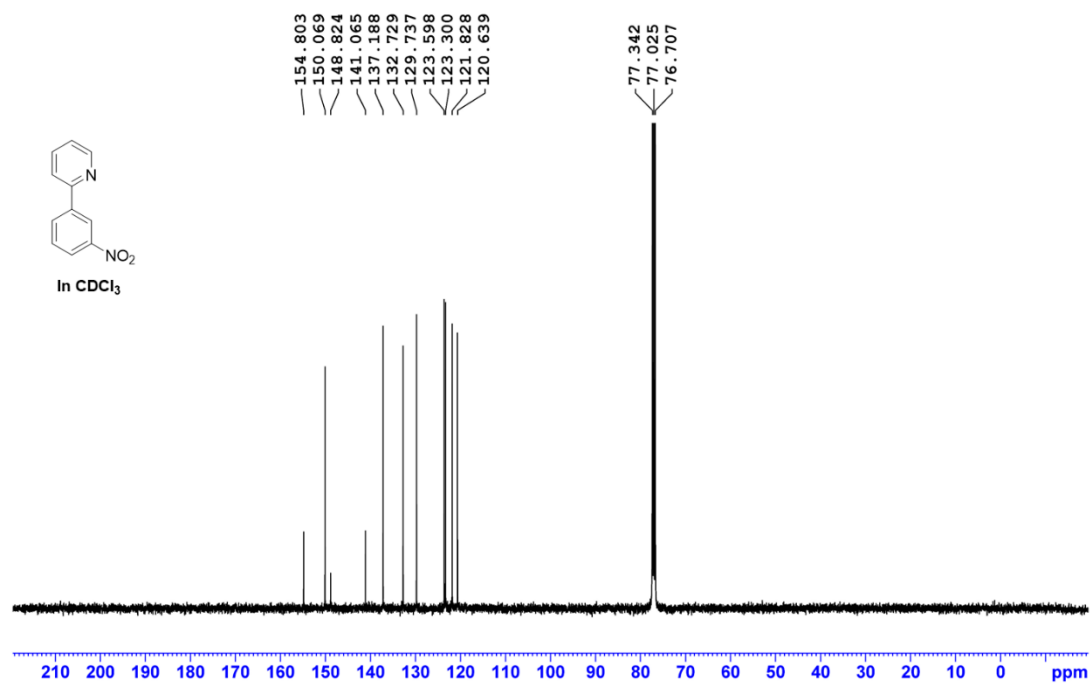

# Supplementary Information

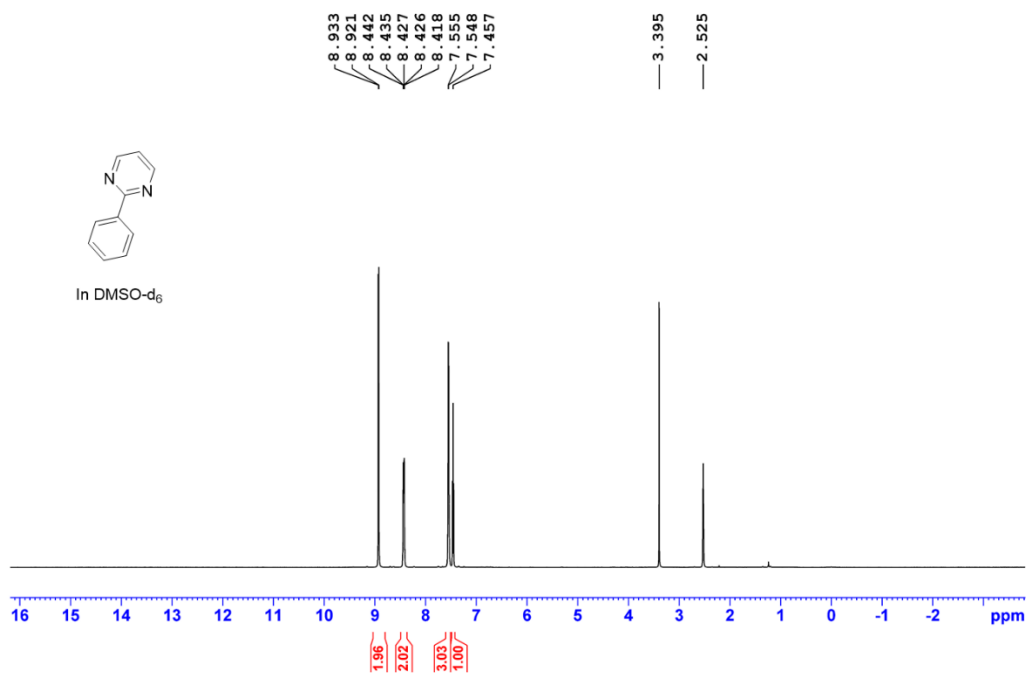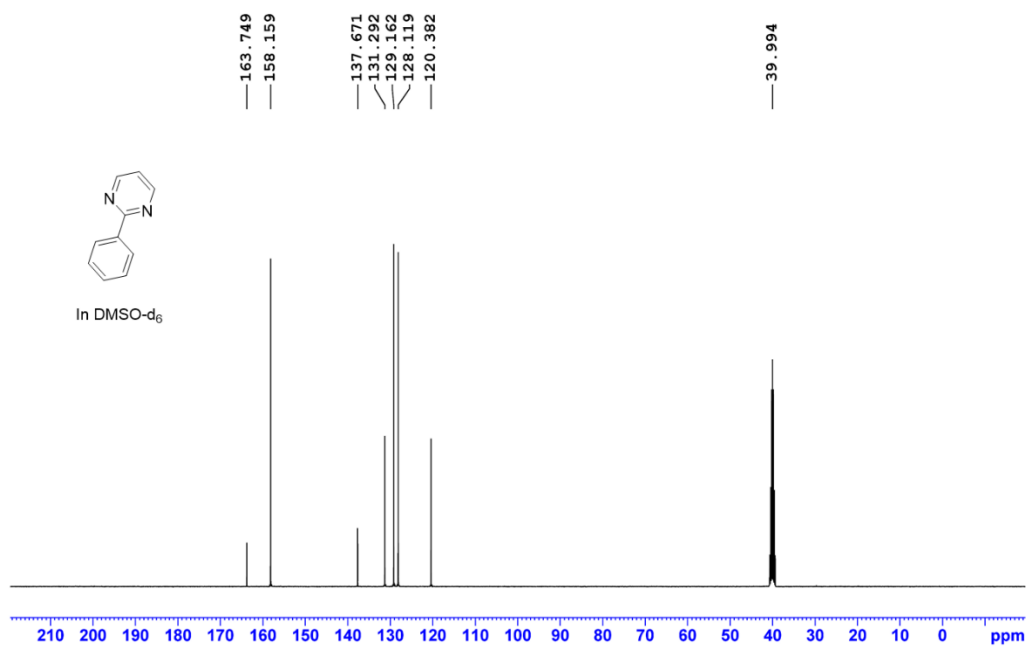

# Supplementary Information

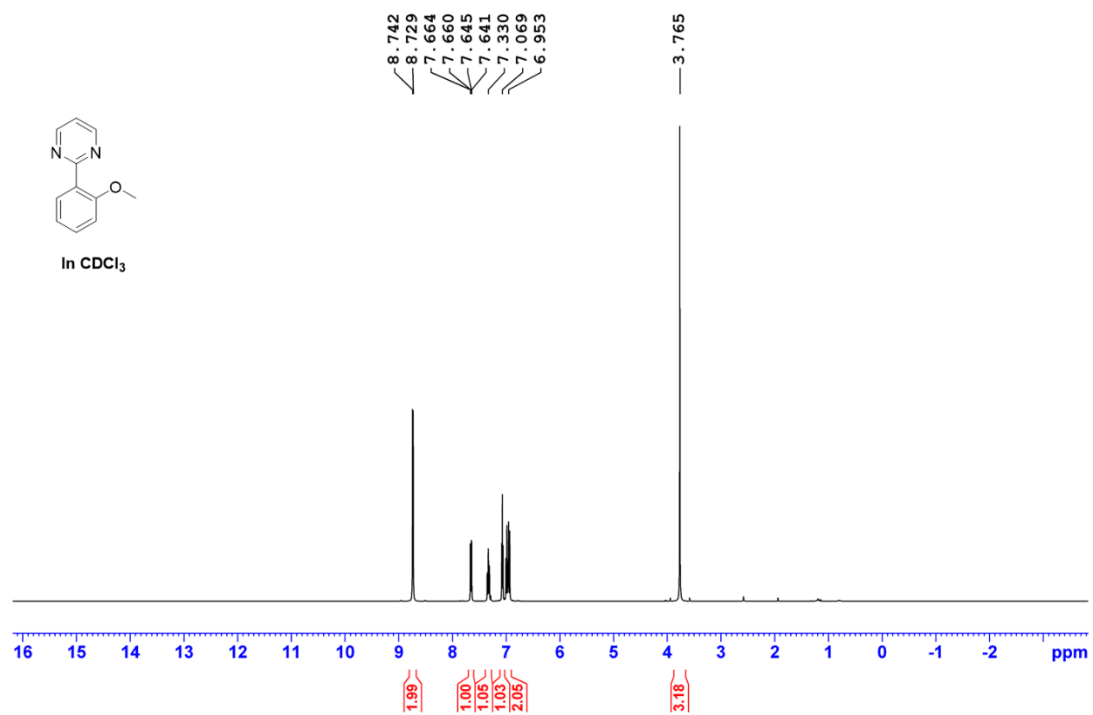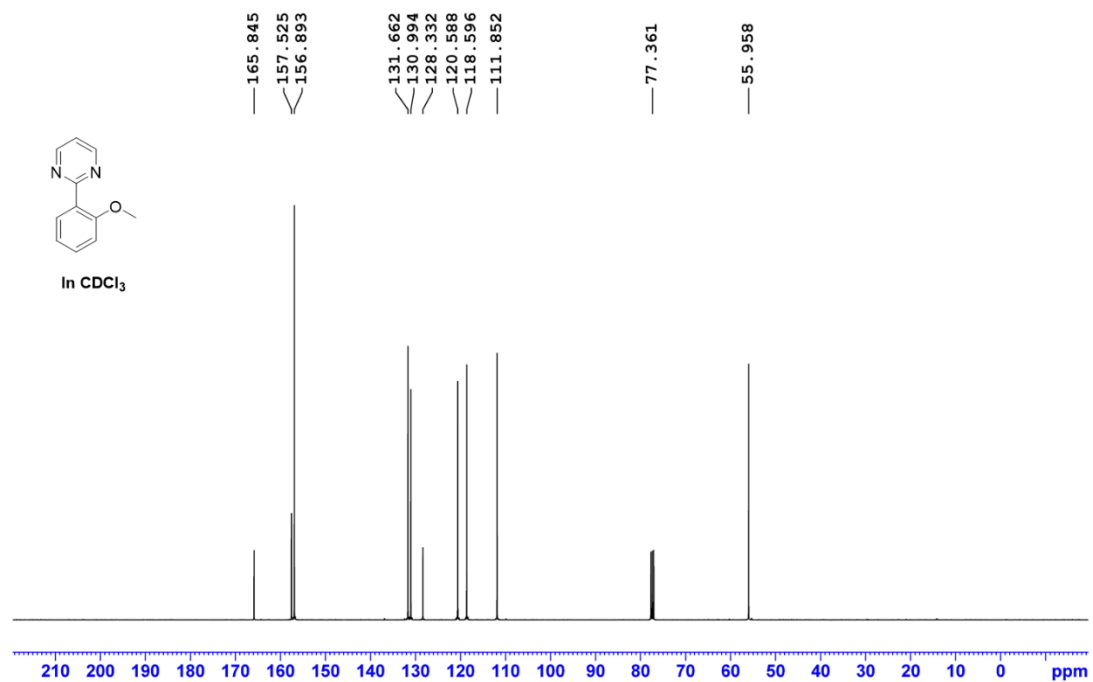

# Supplementary Information

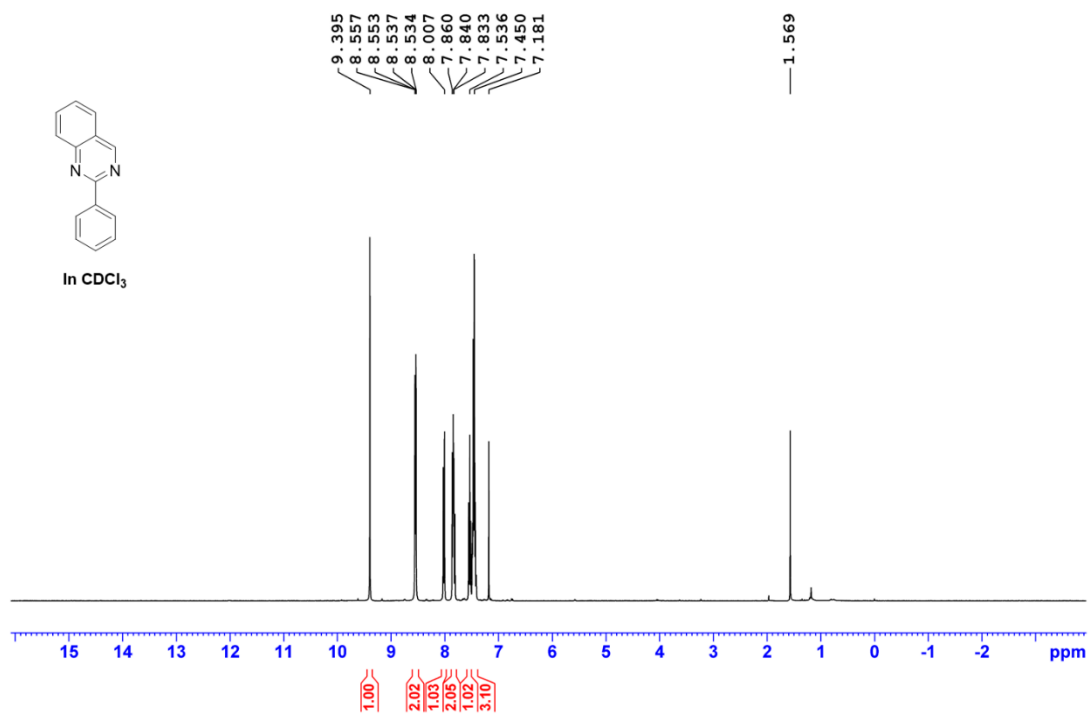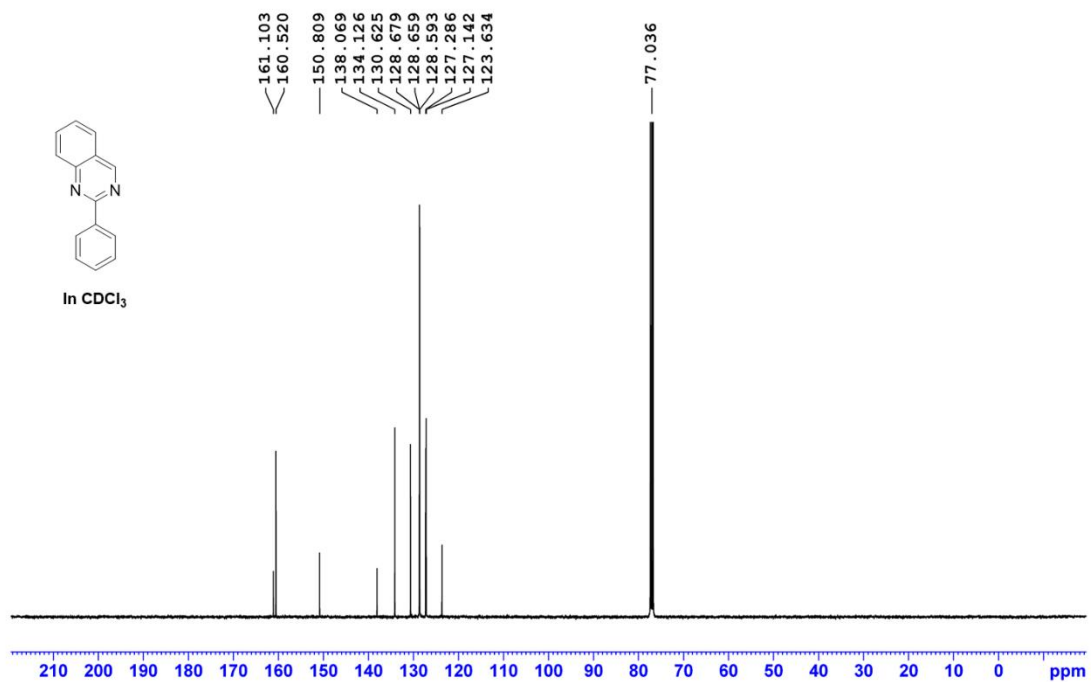

# Supplementary Information

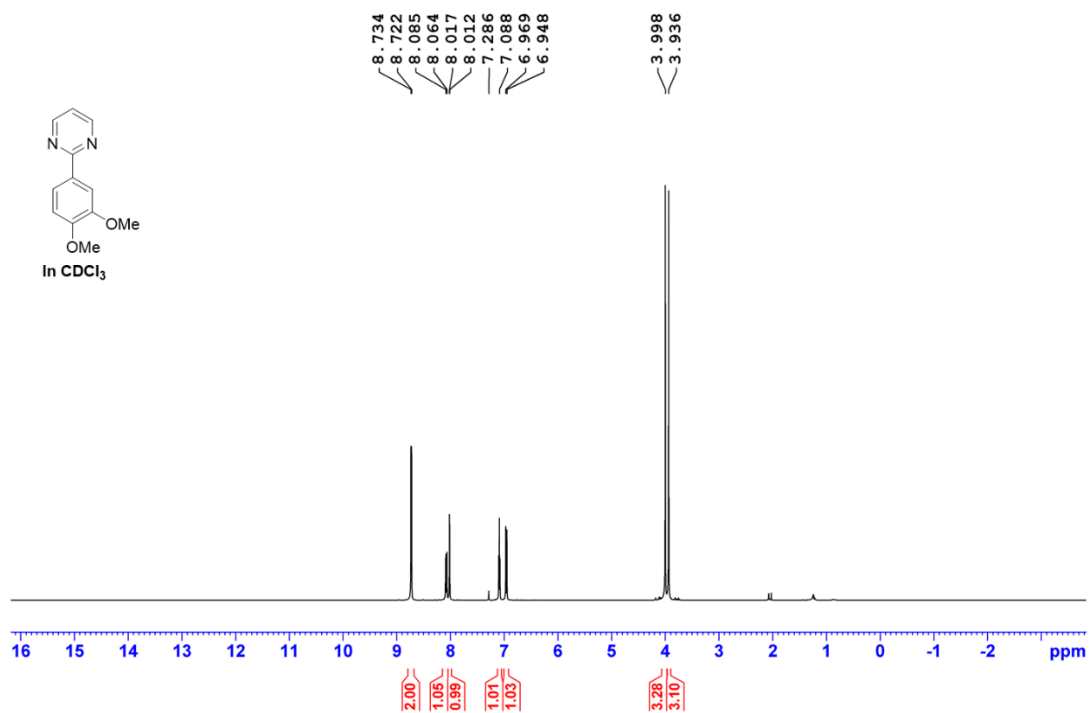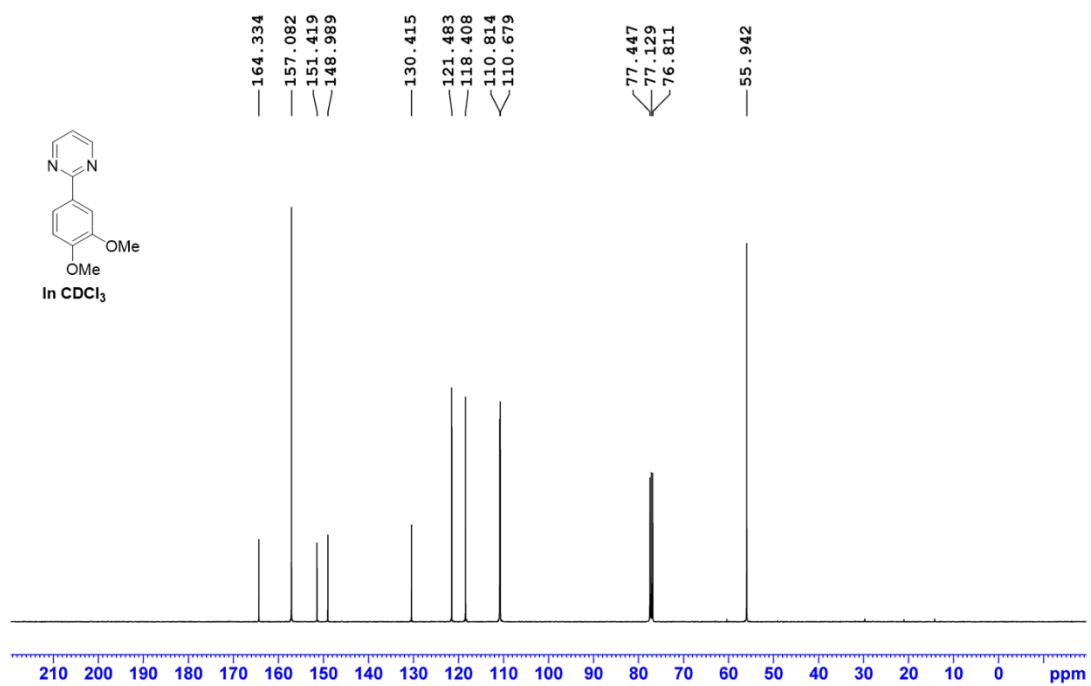

# Supplementary Information

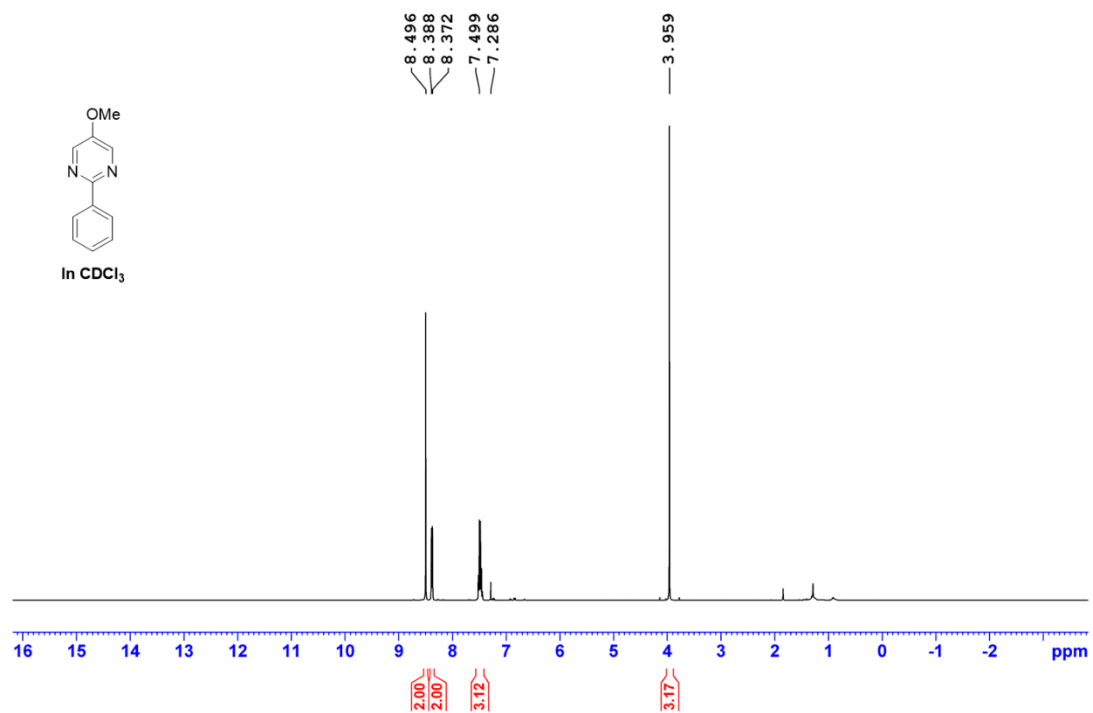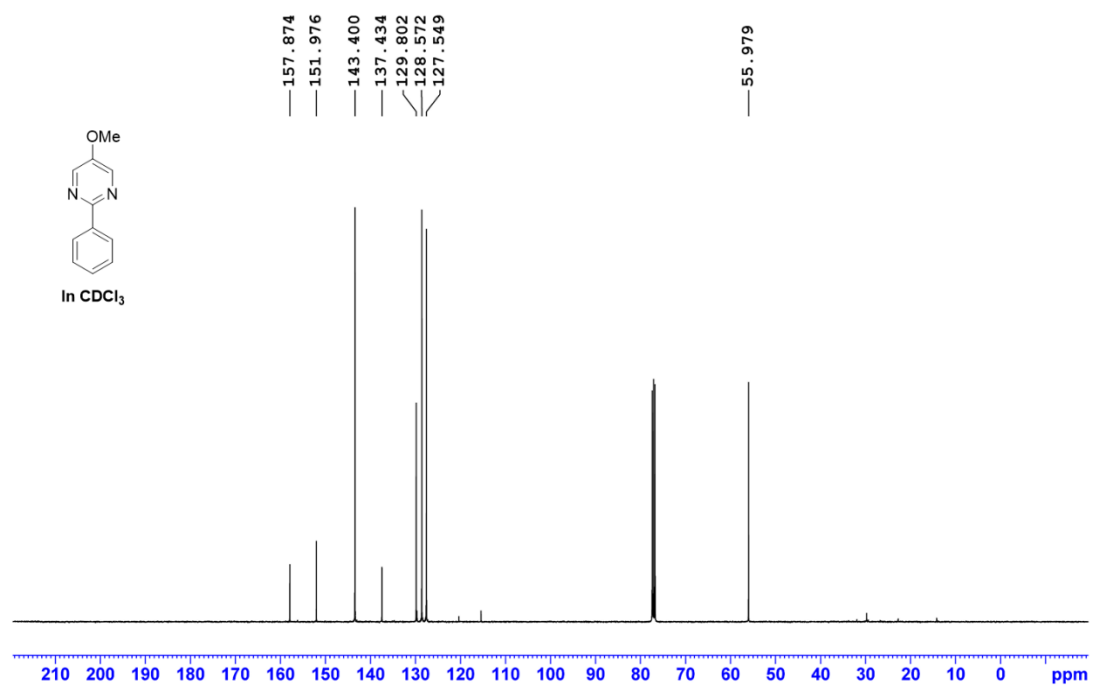

# Supplementary Information

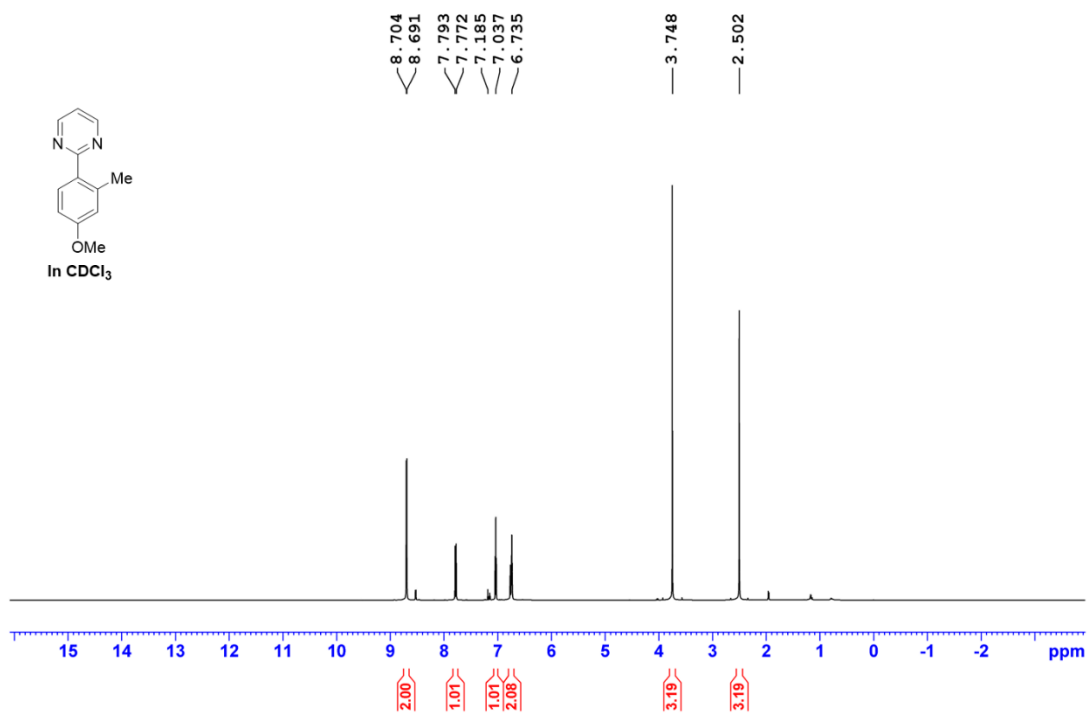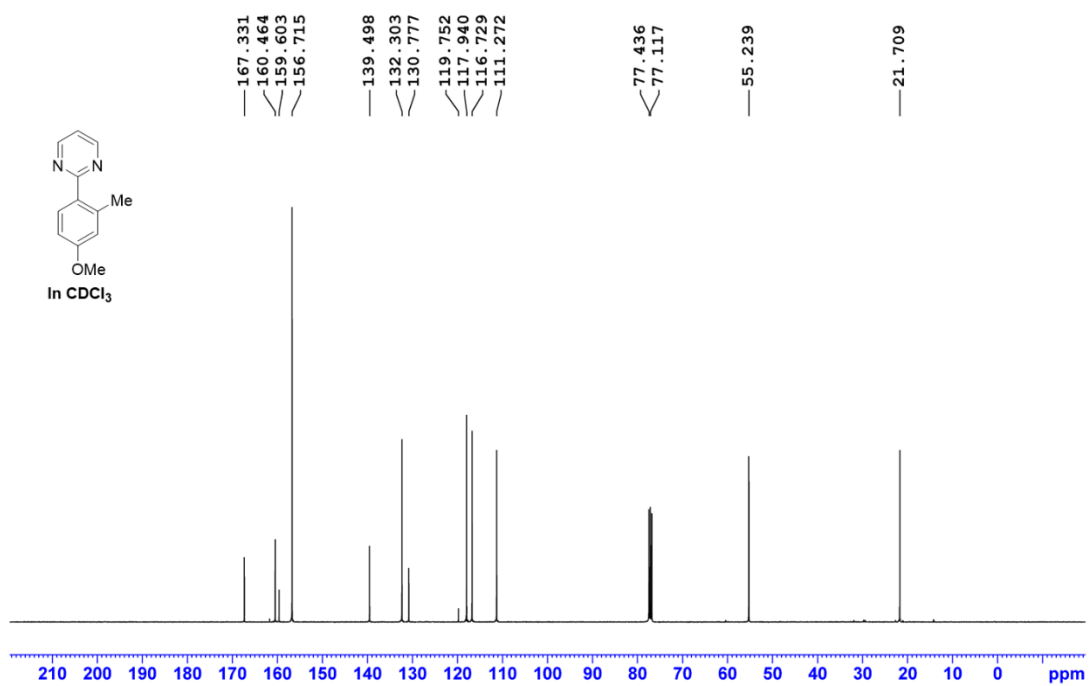

# Supplementary Information

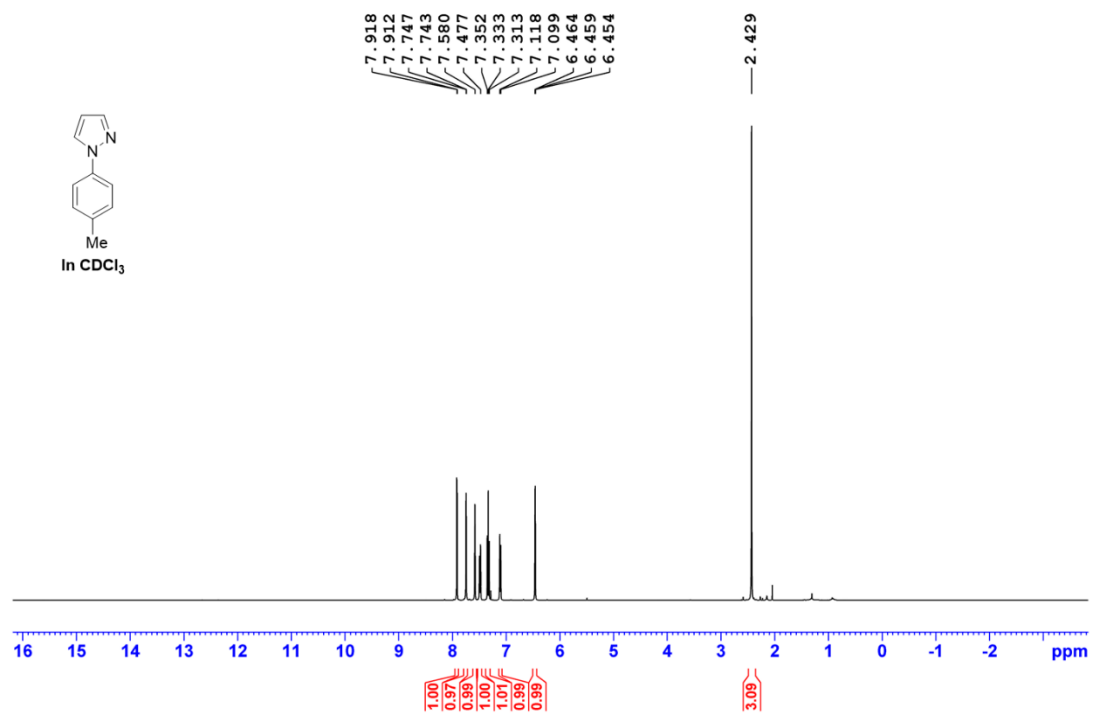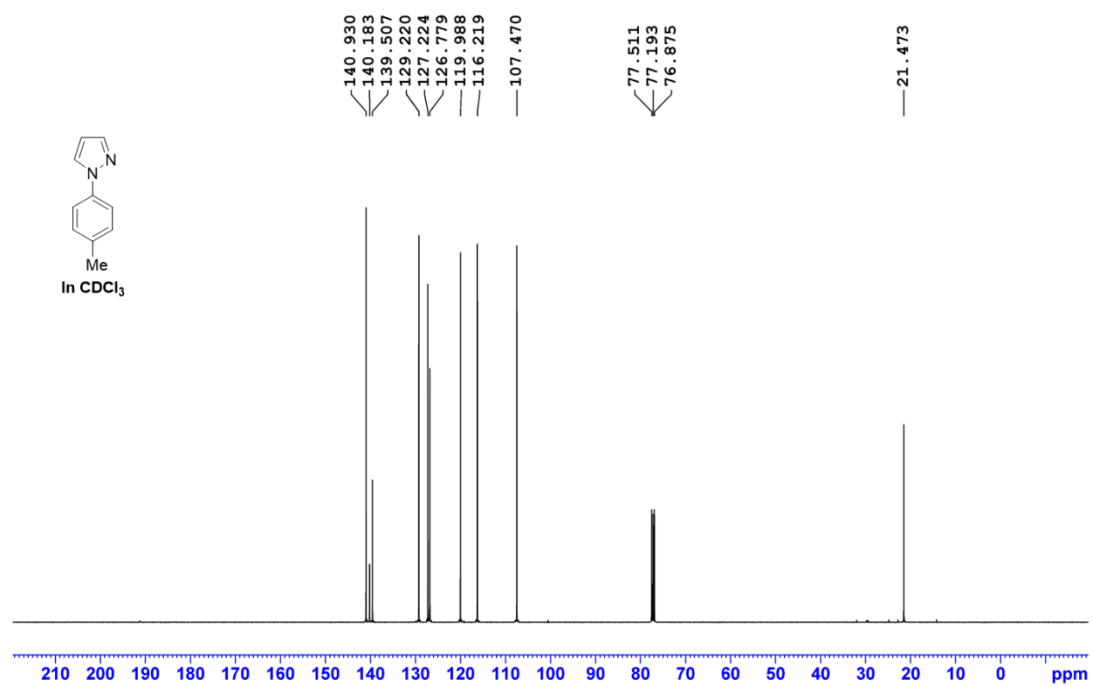

# Supplementary Information

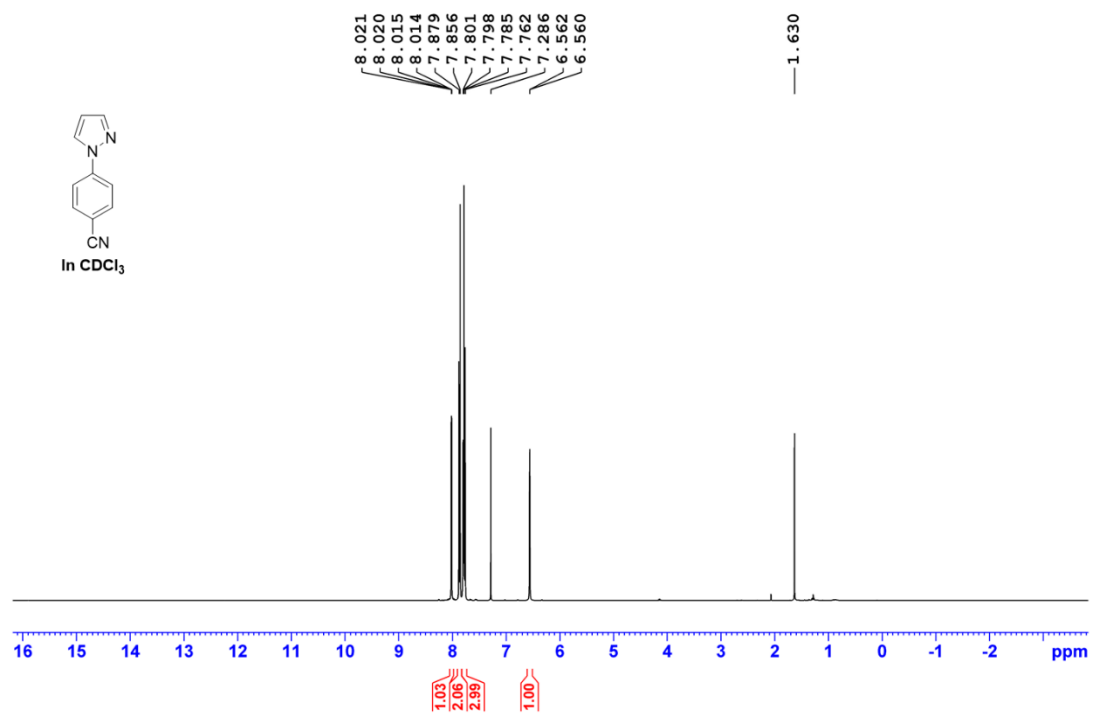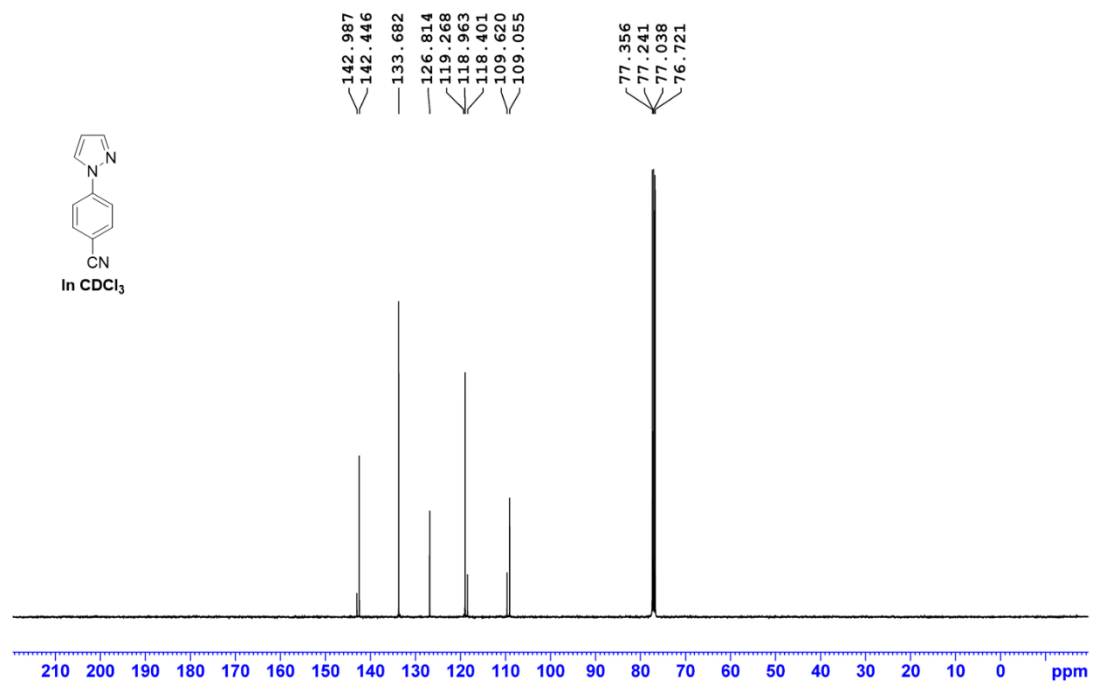

# Supplementary Information

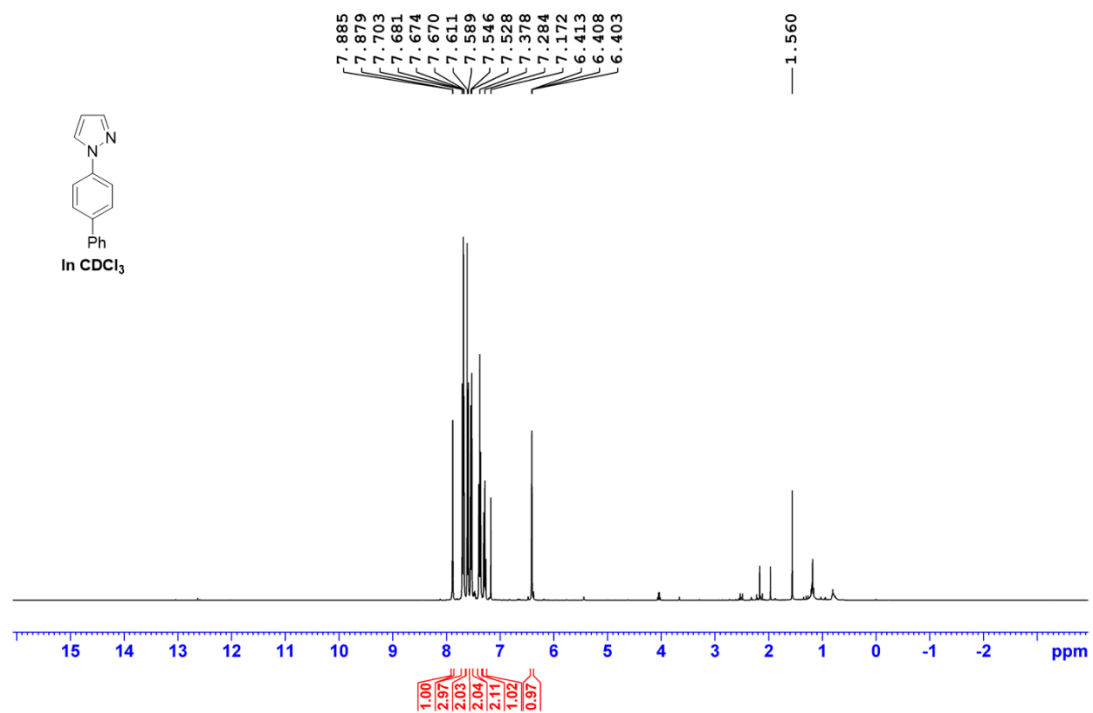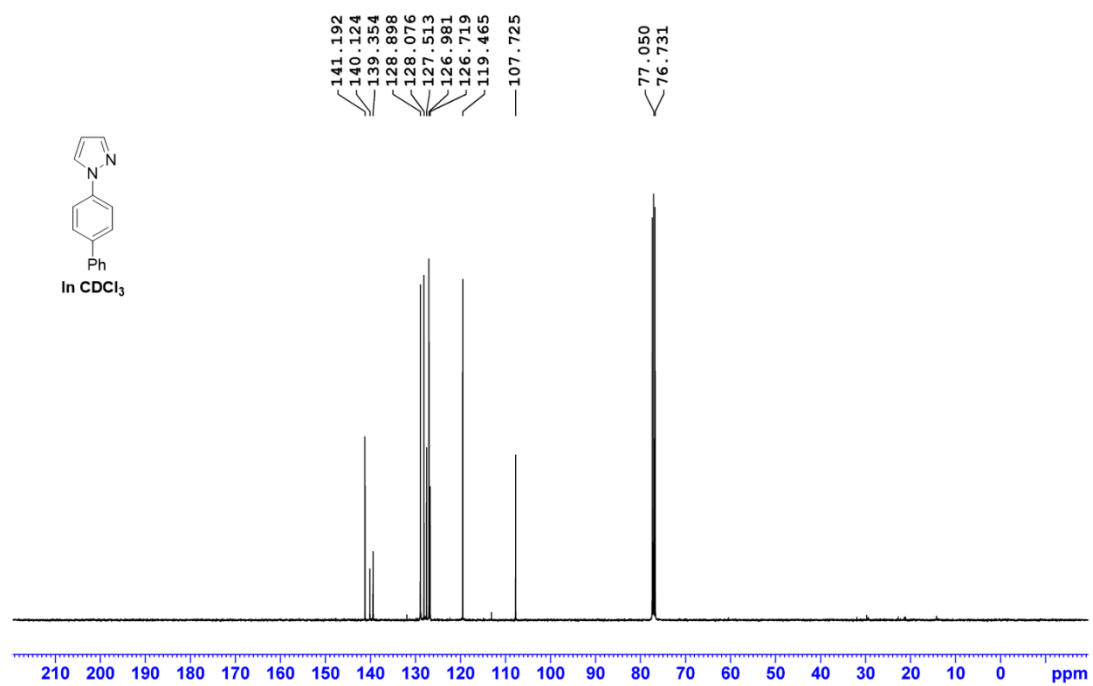

# Supplementary Information

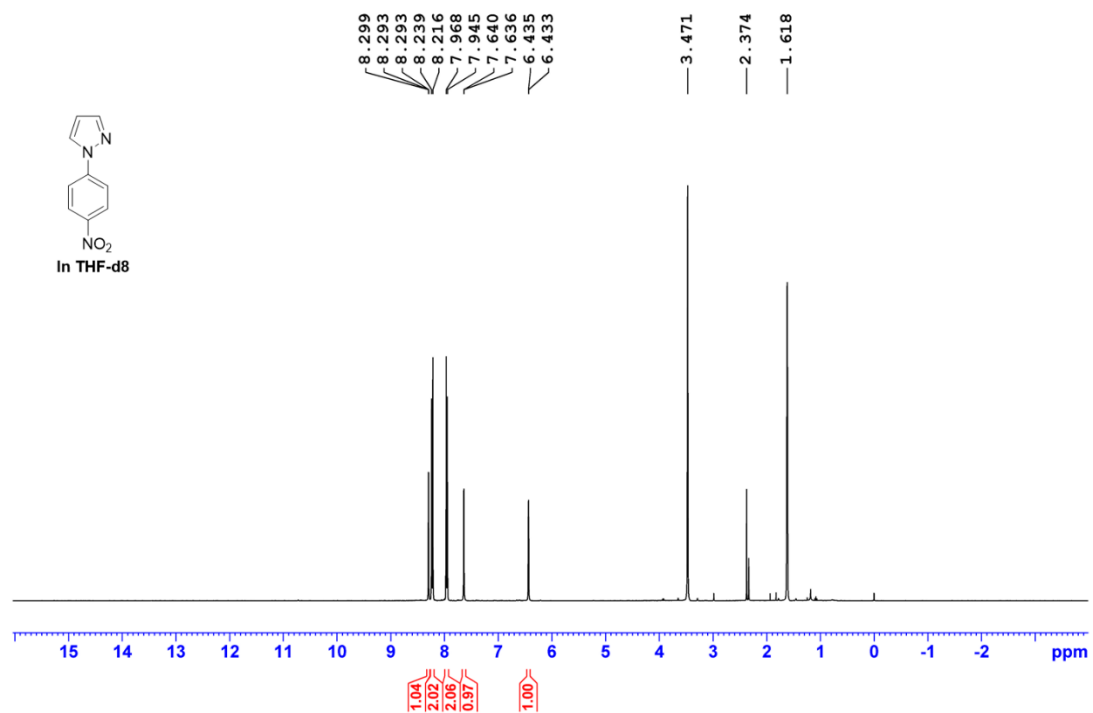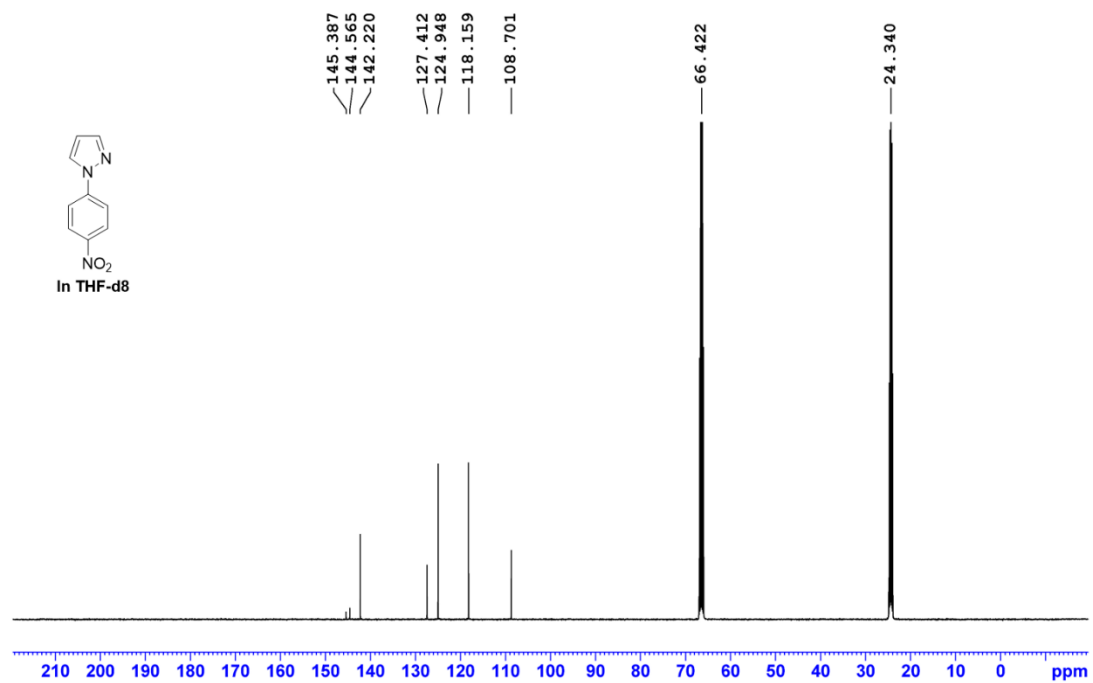

# Supplementary Information

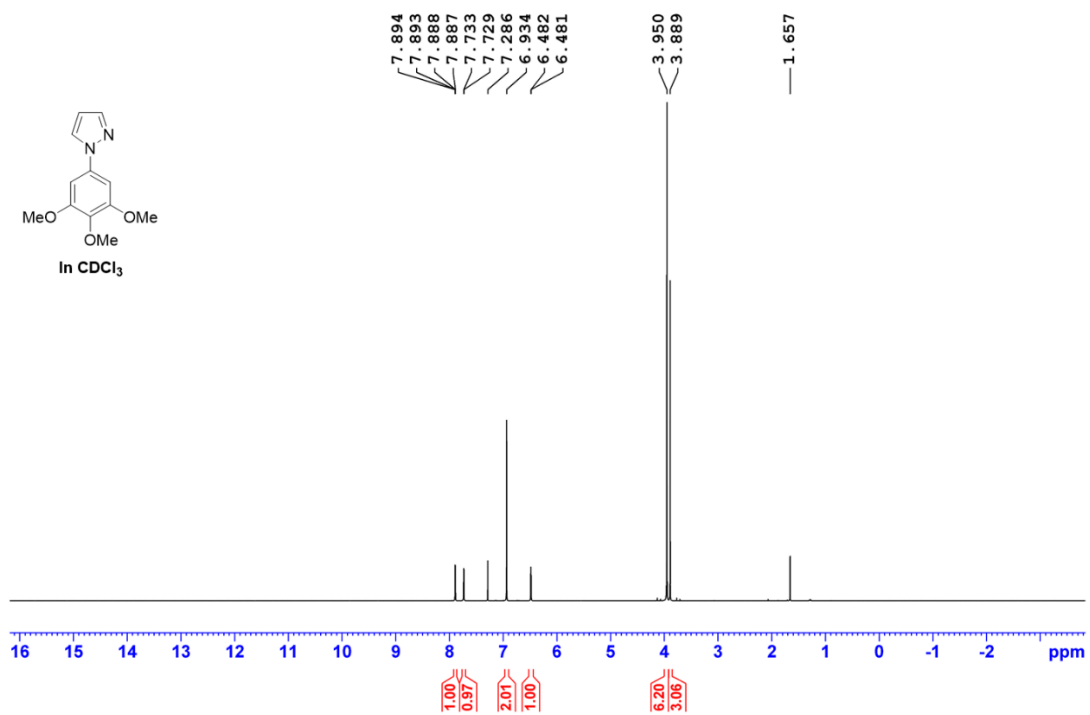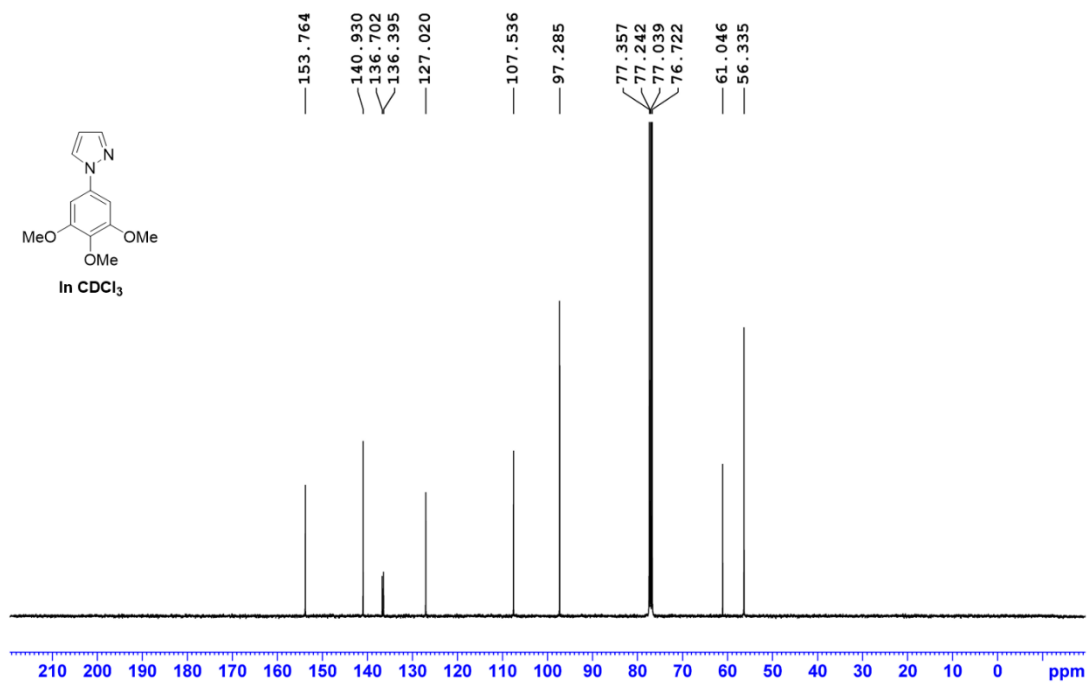

# Supplementary Information

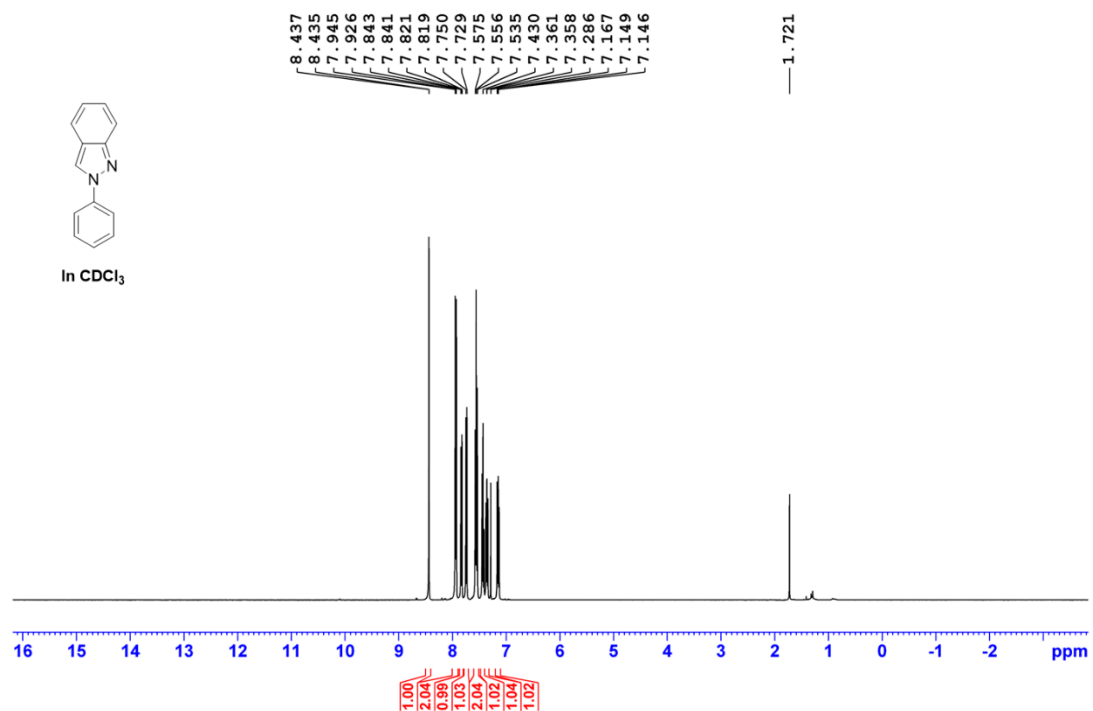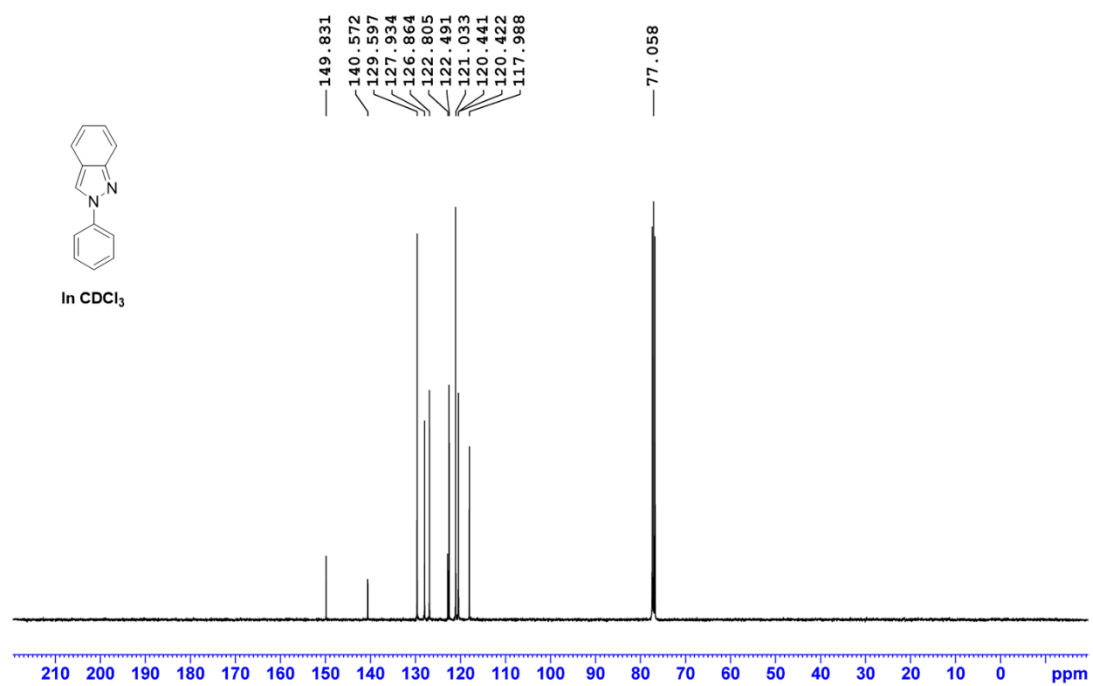

# Supplementary Information

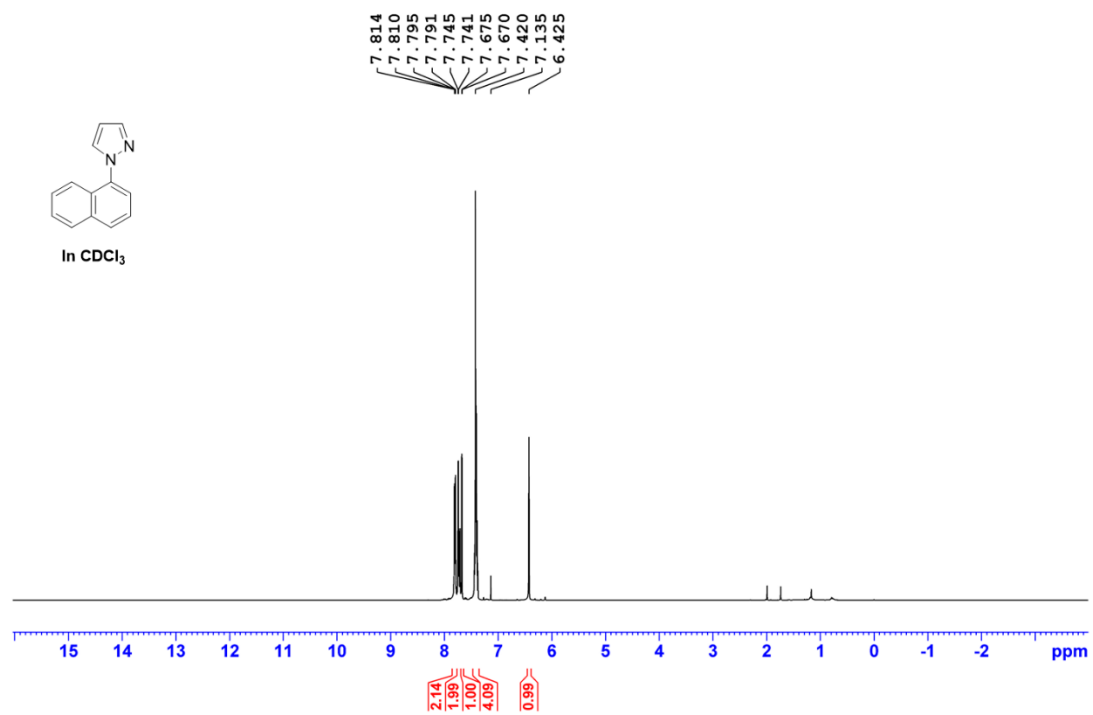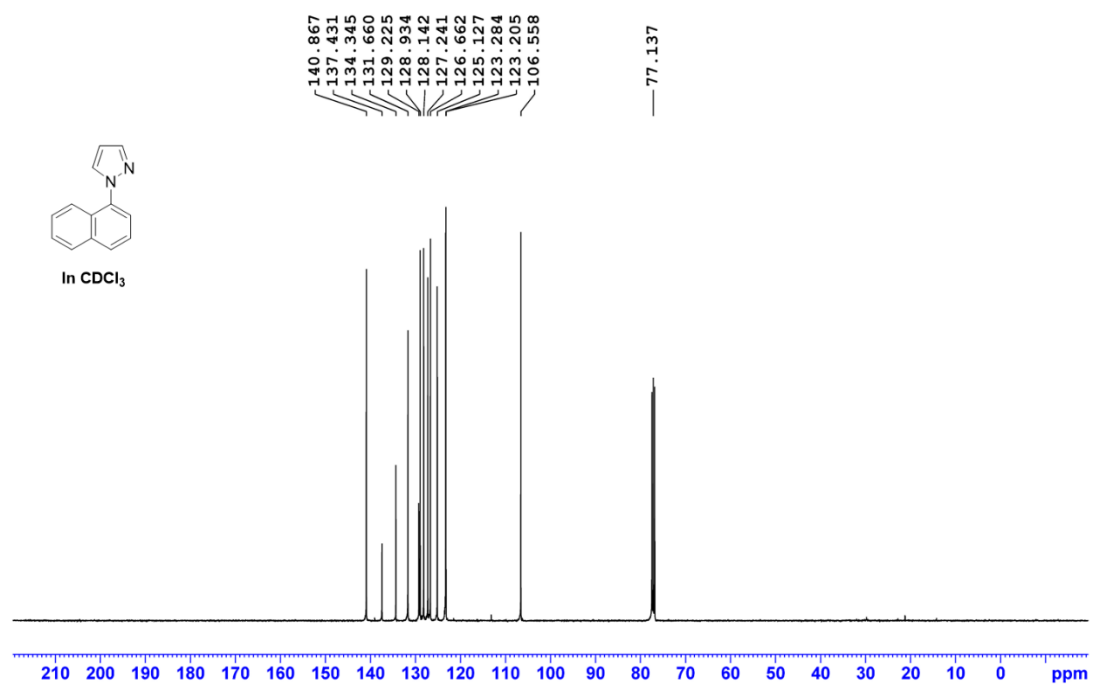

# Supplementary Information

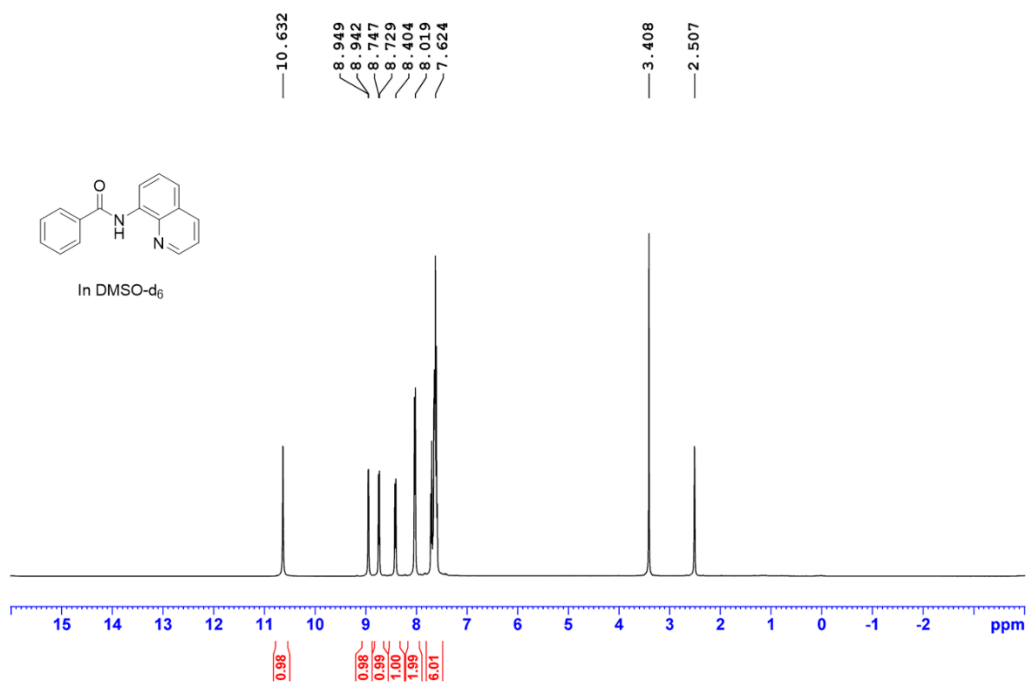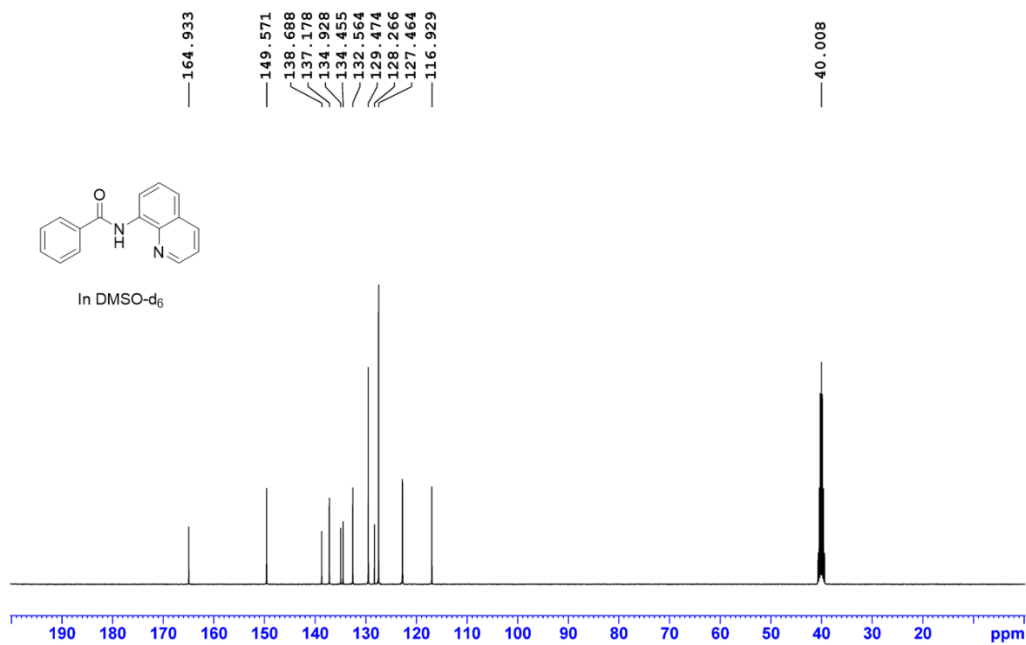

# Supplementary Information

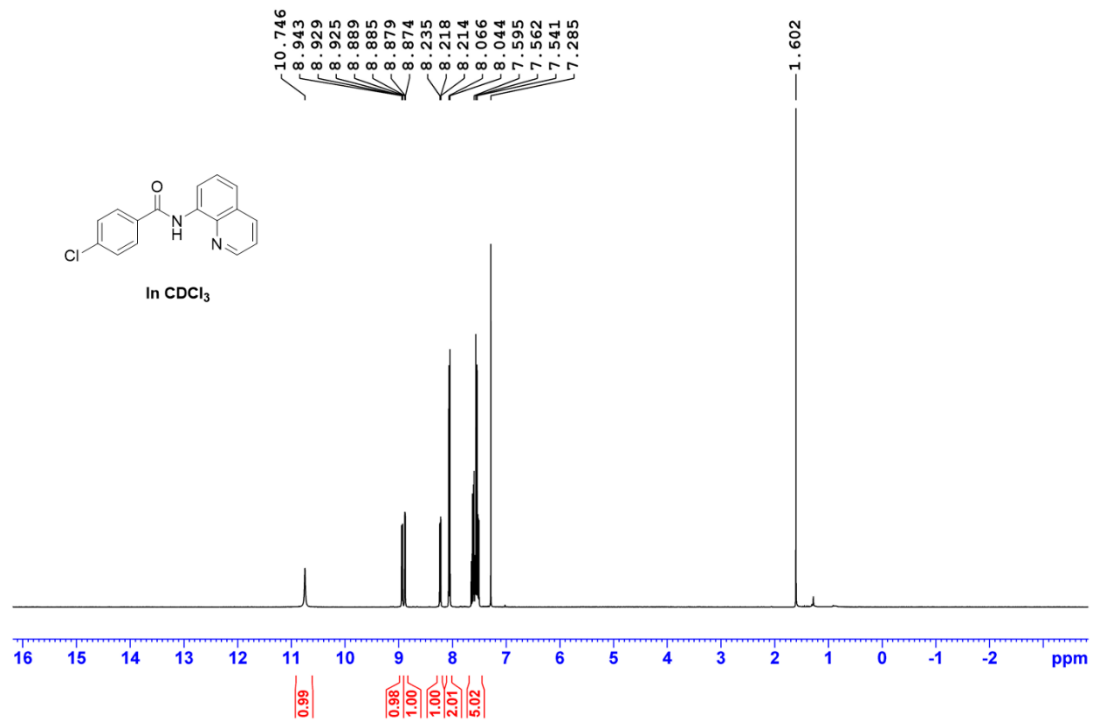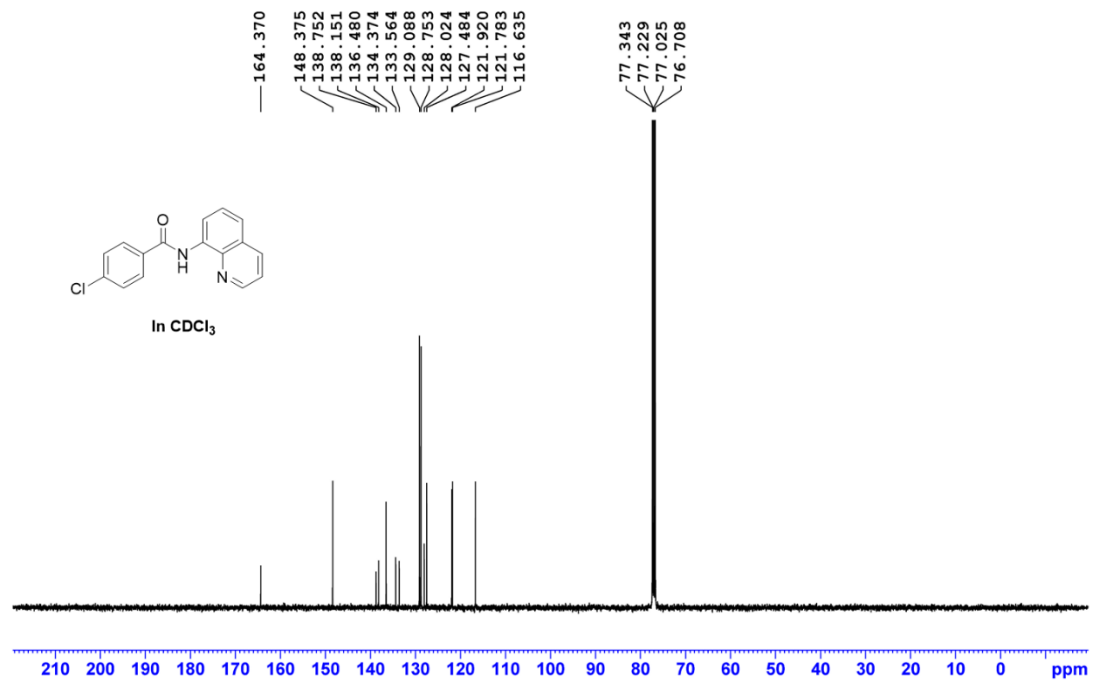

# Supplementary Information

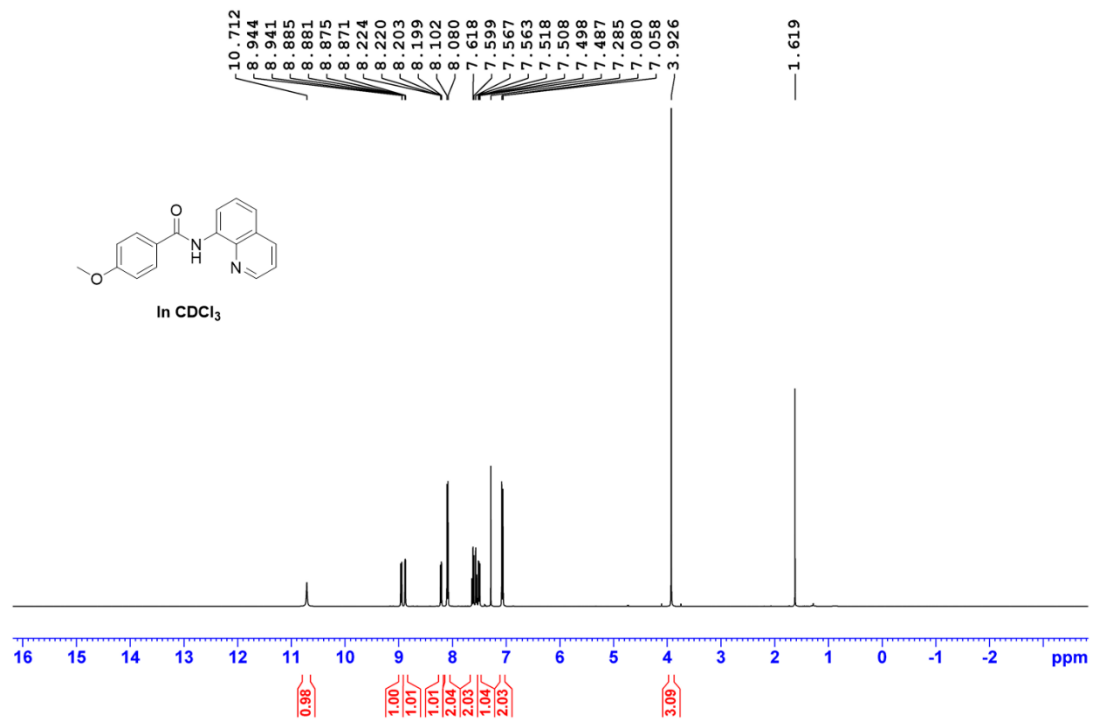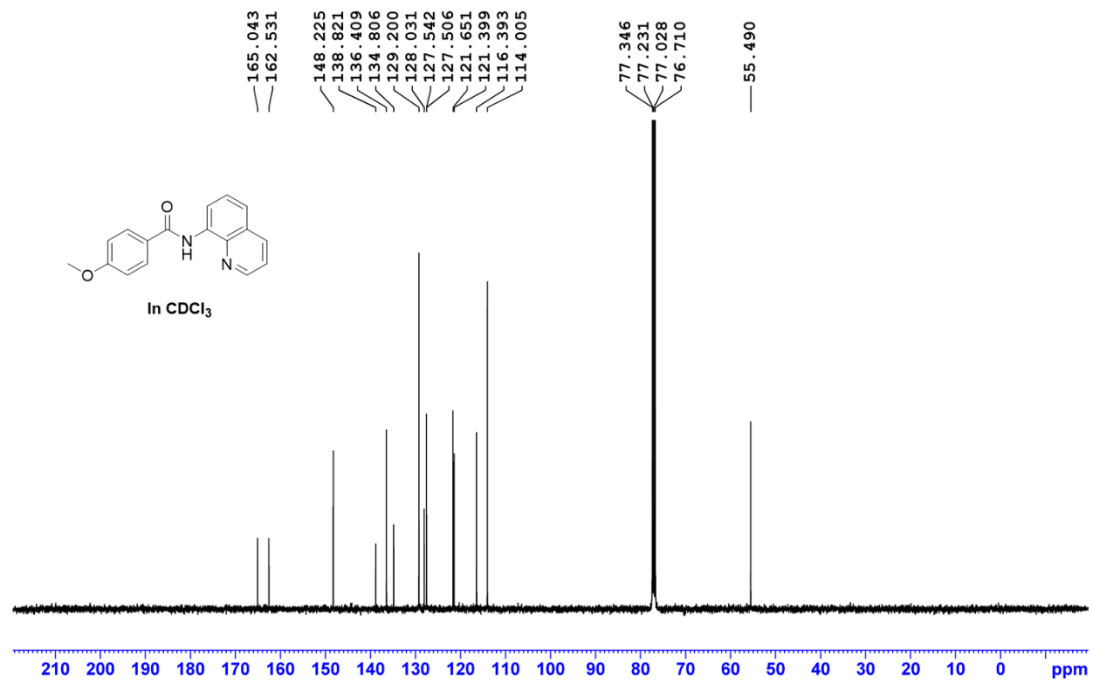

# Supplementary Information

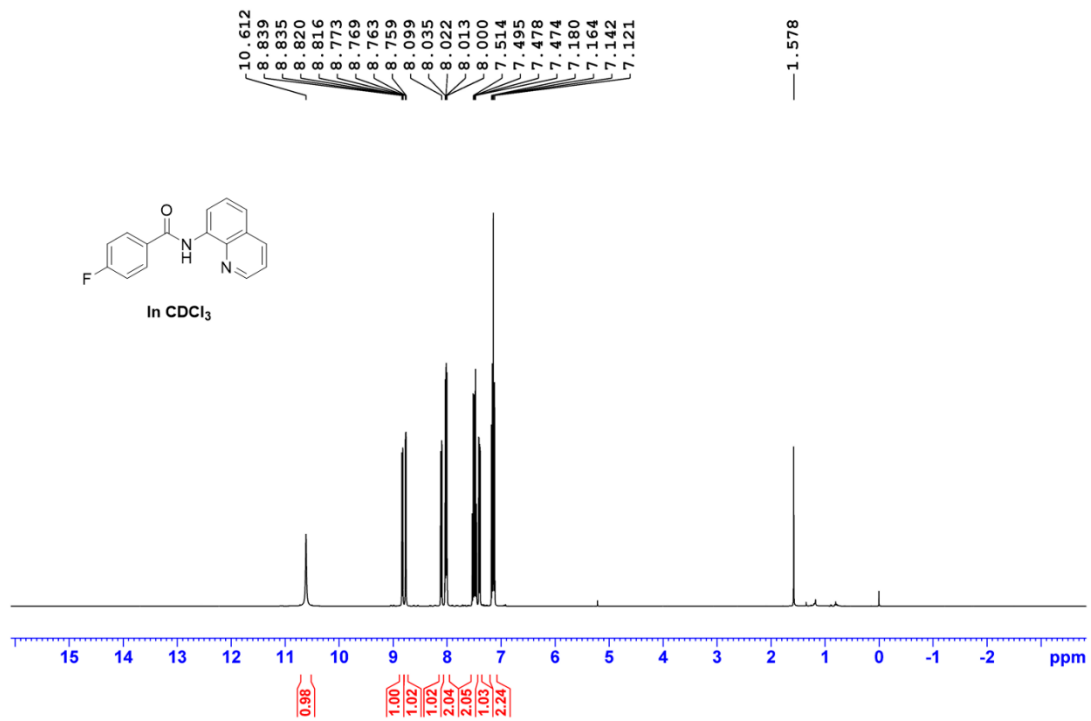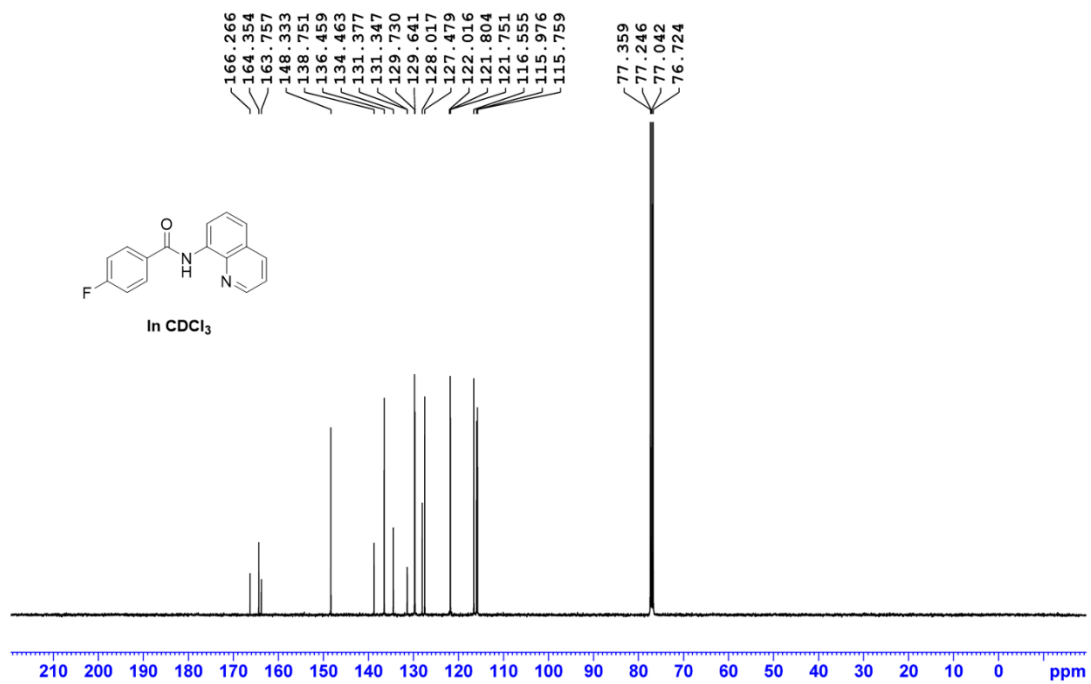

# Supplementary Information

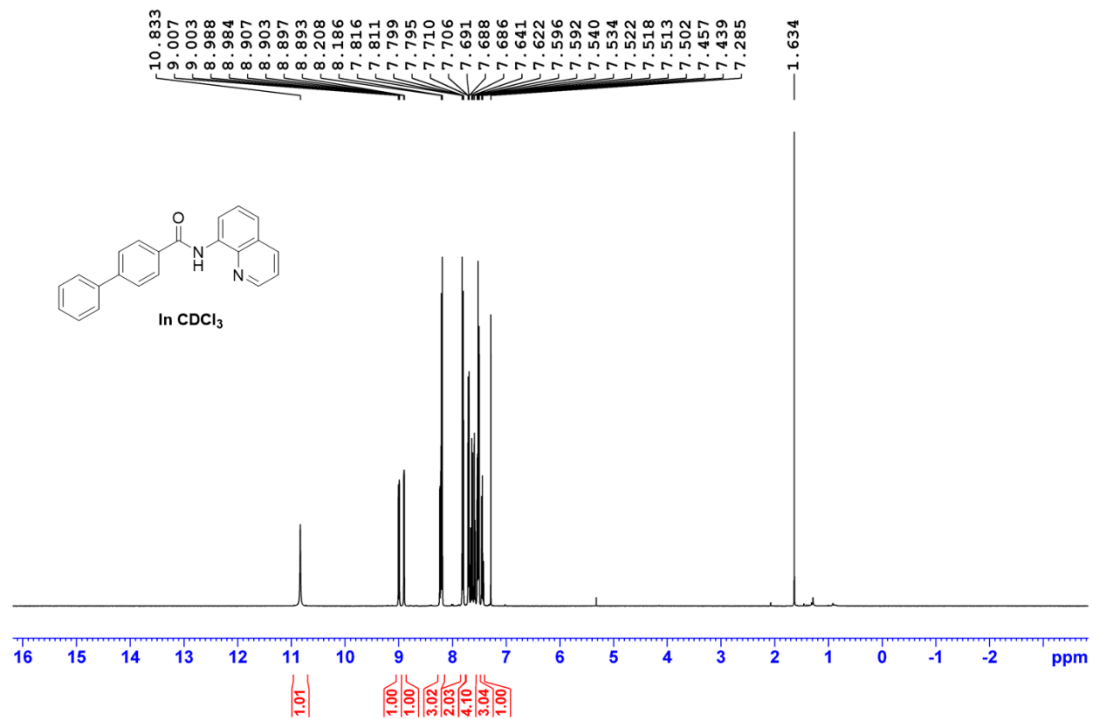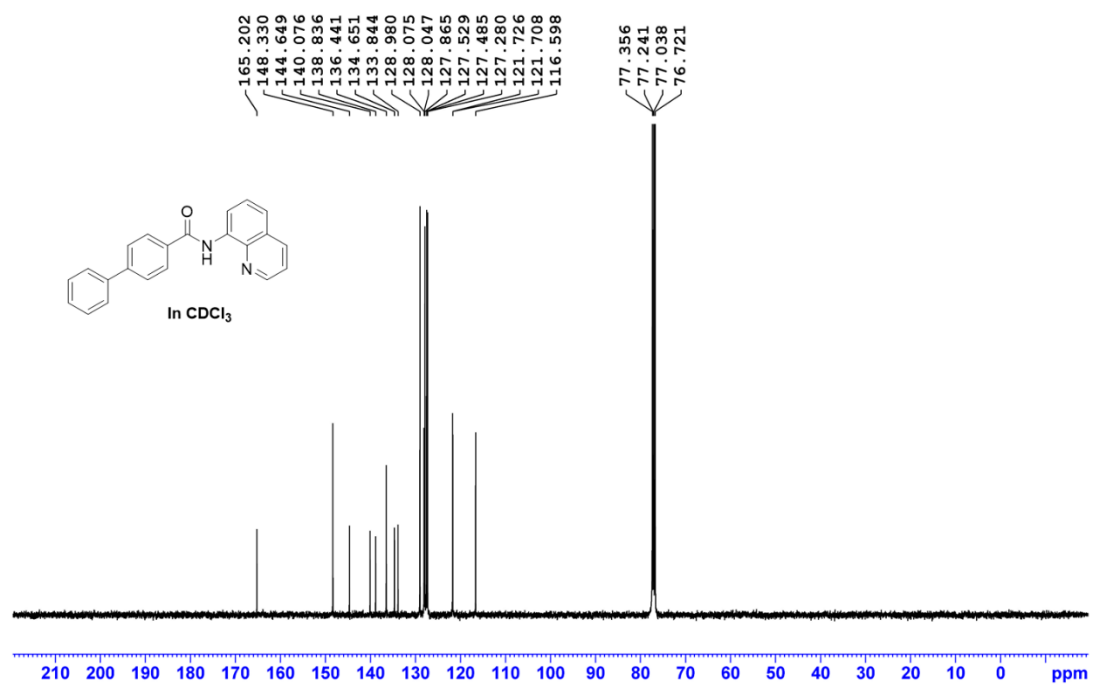

# Supplementary Information

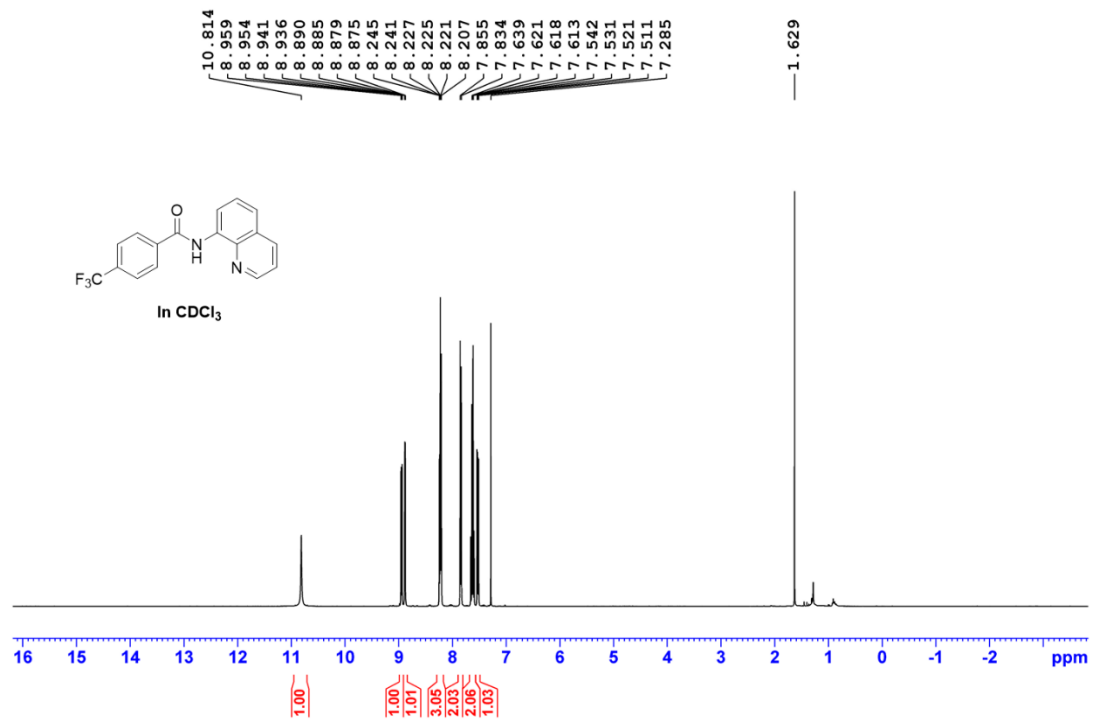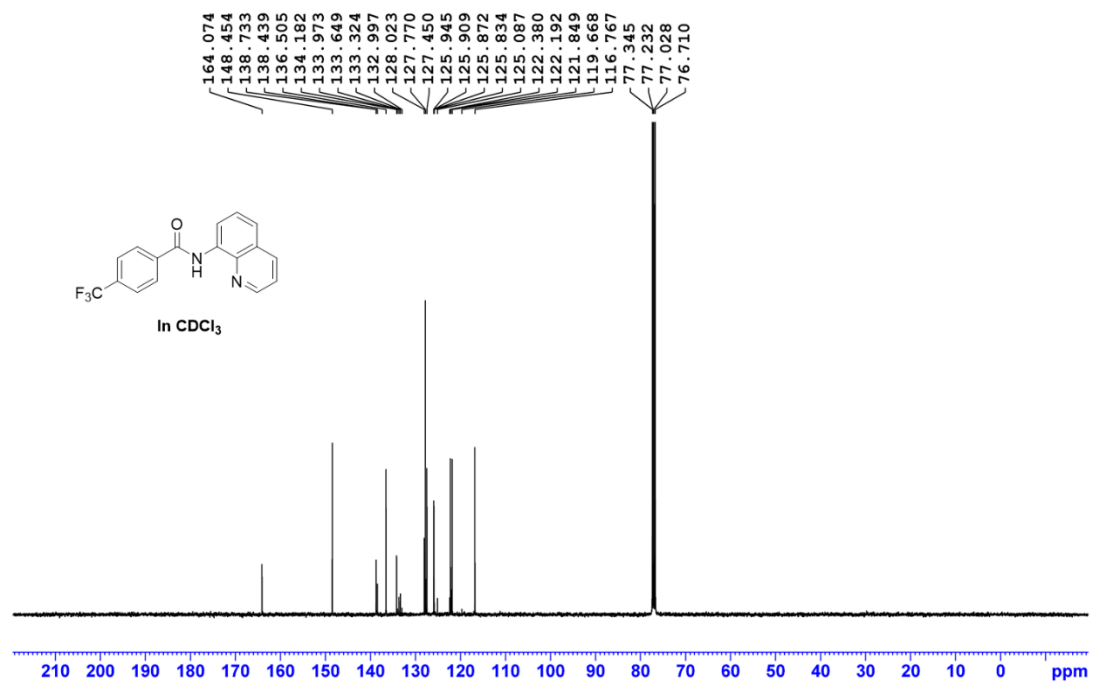

# Supplementary Information

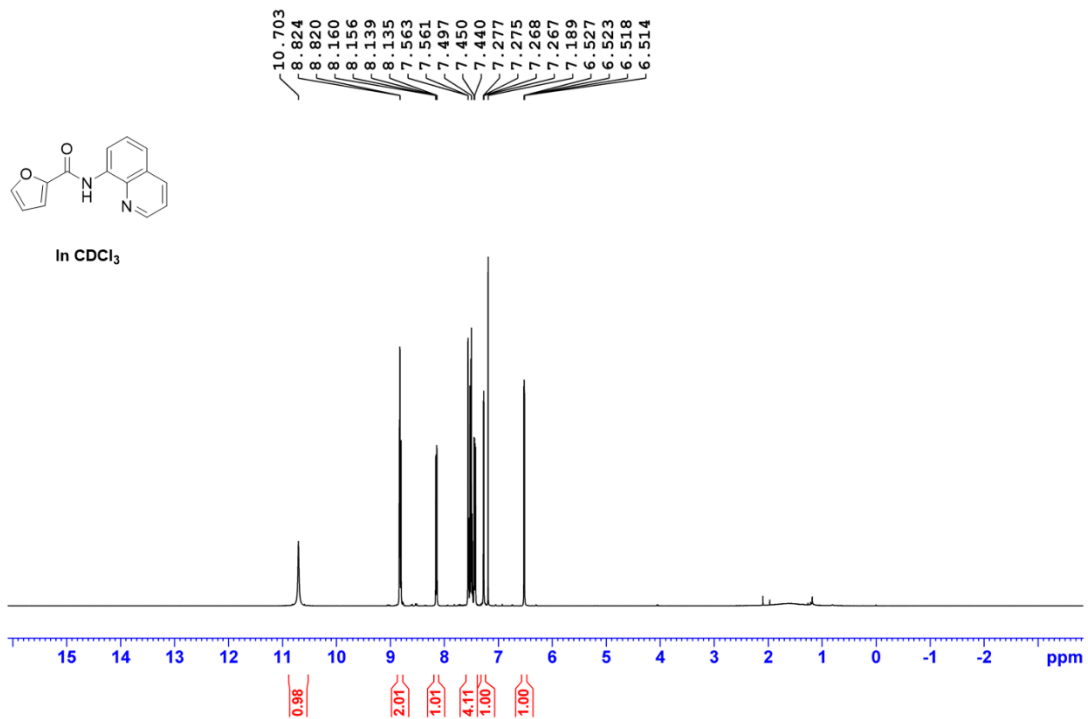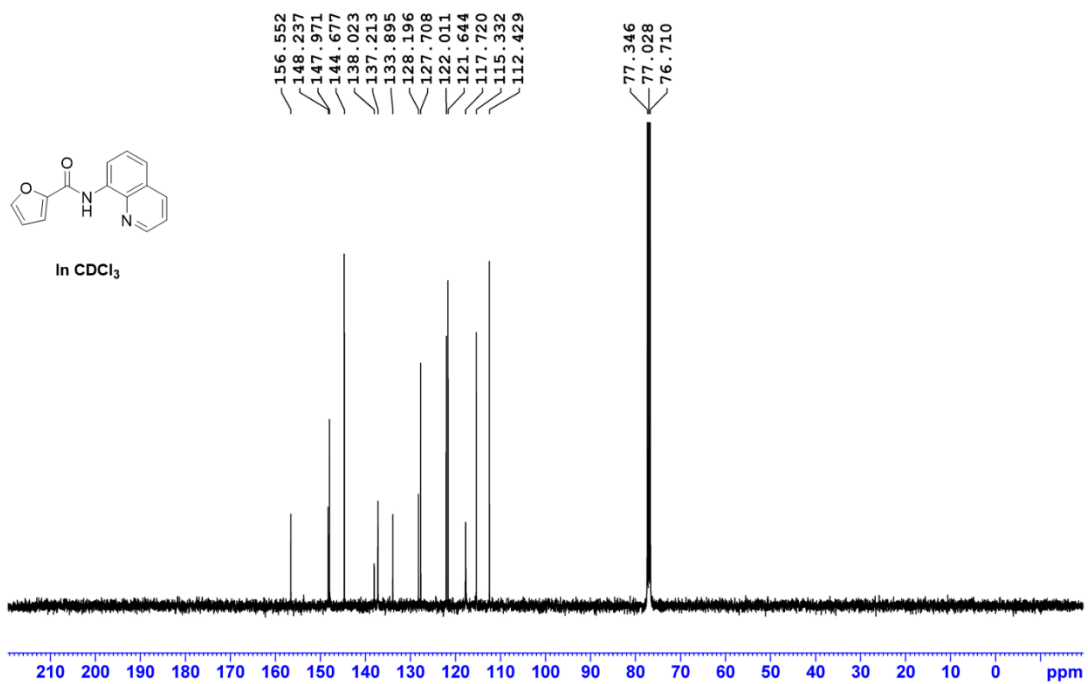

# Supplementary Information

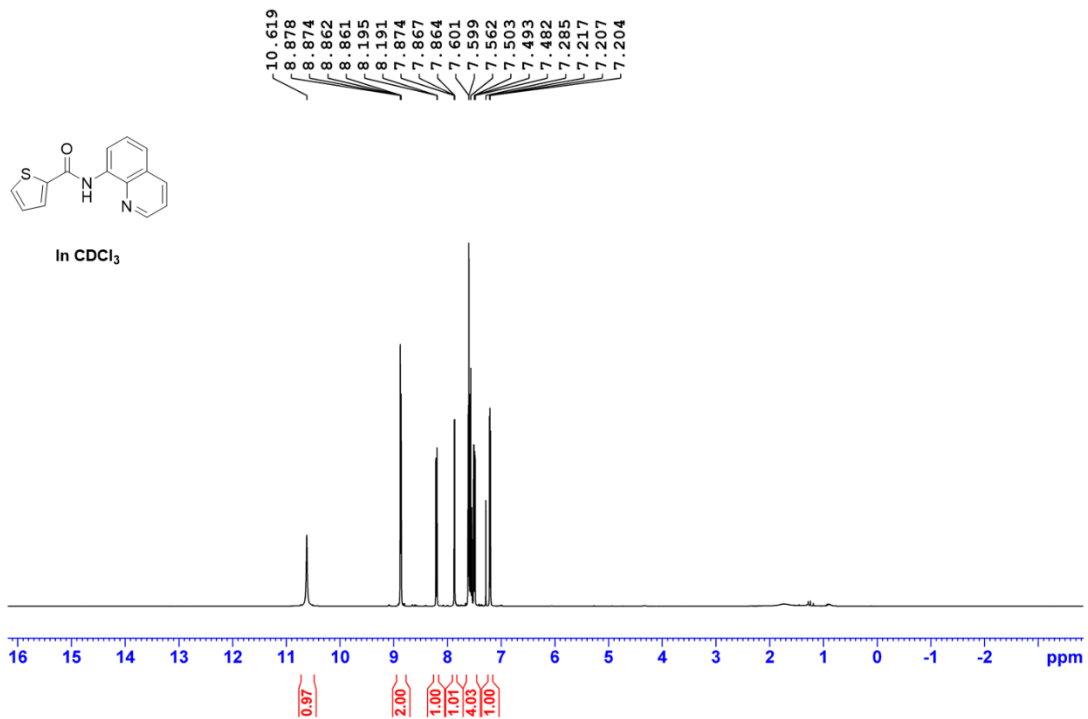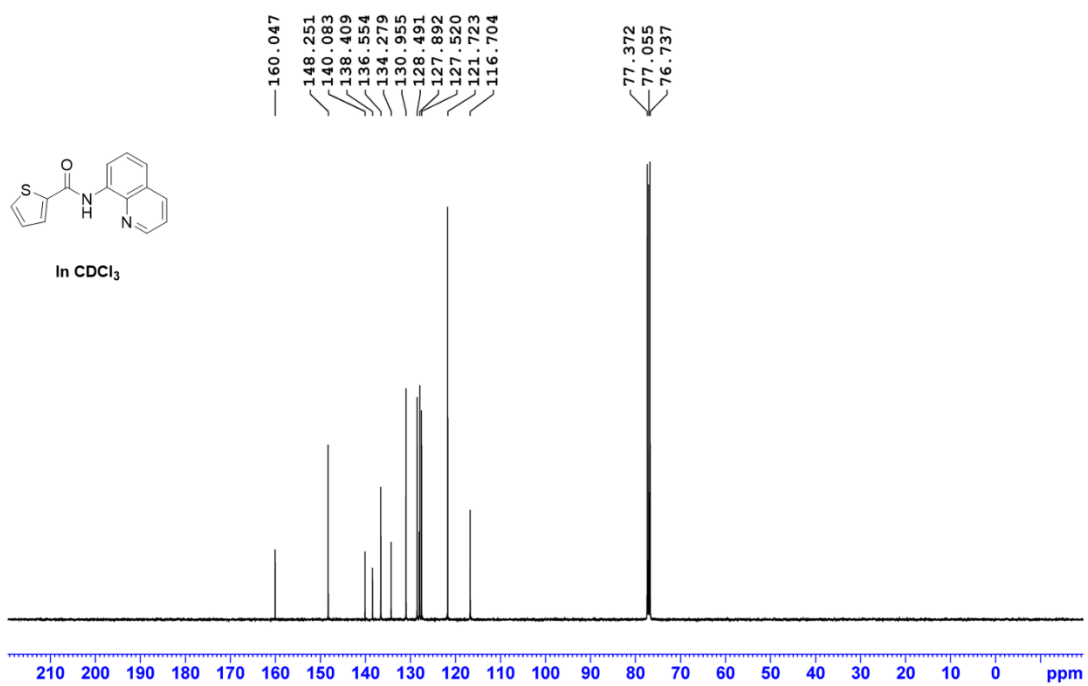

# Supplementary Information

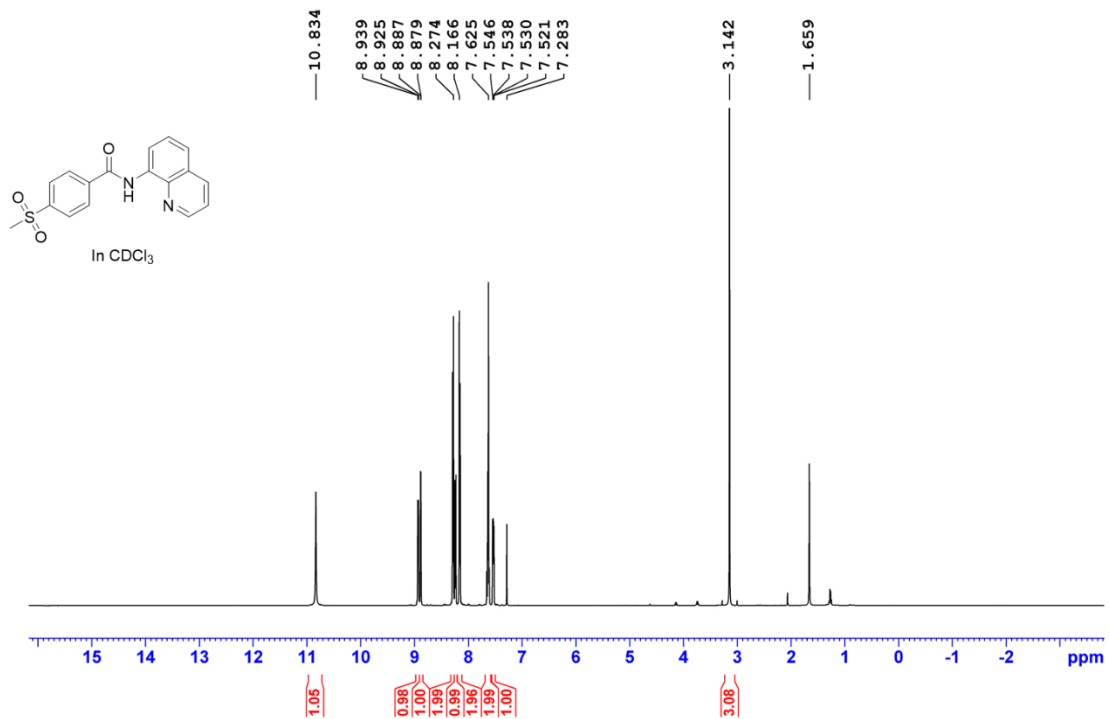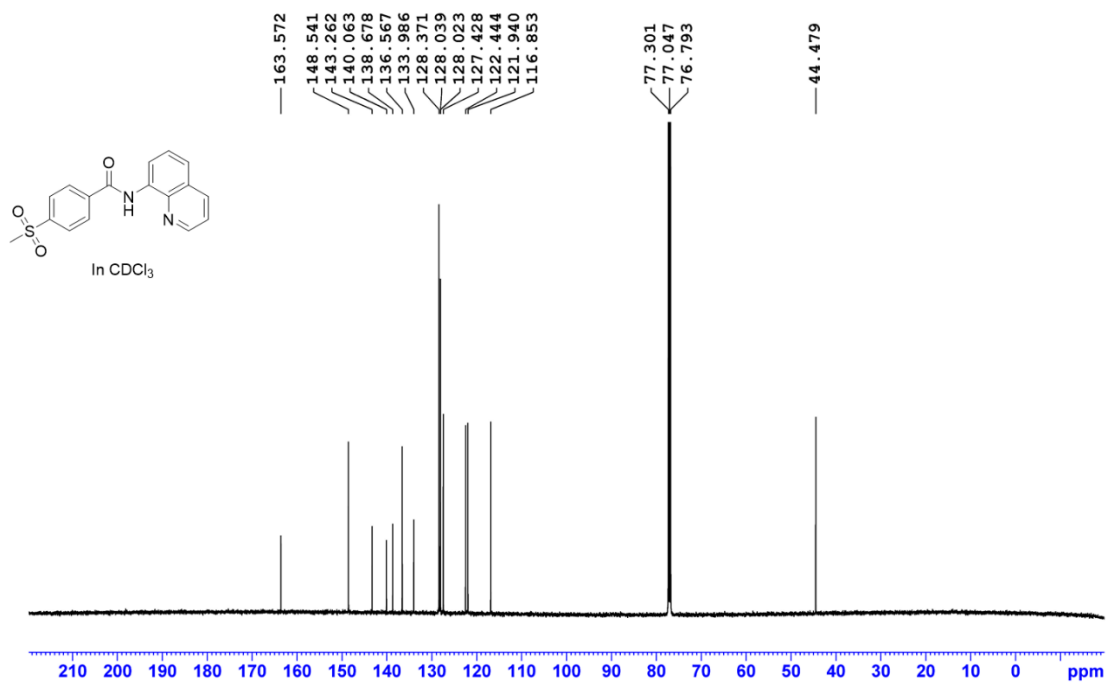

# Supplementary Information

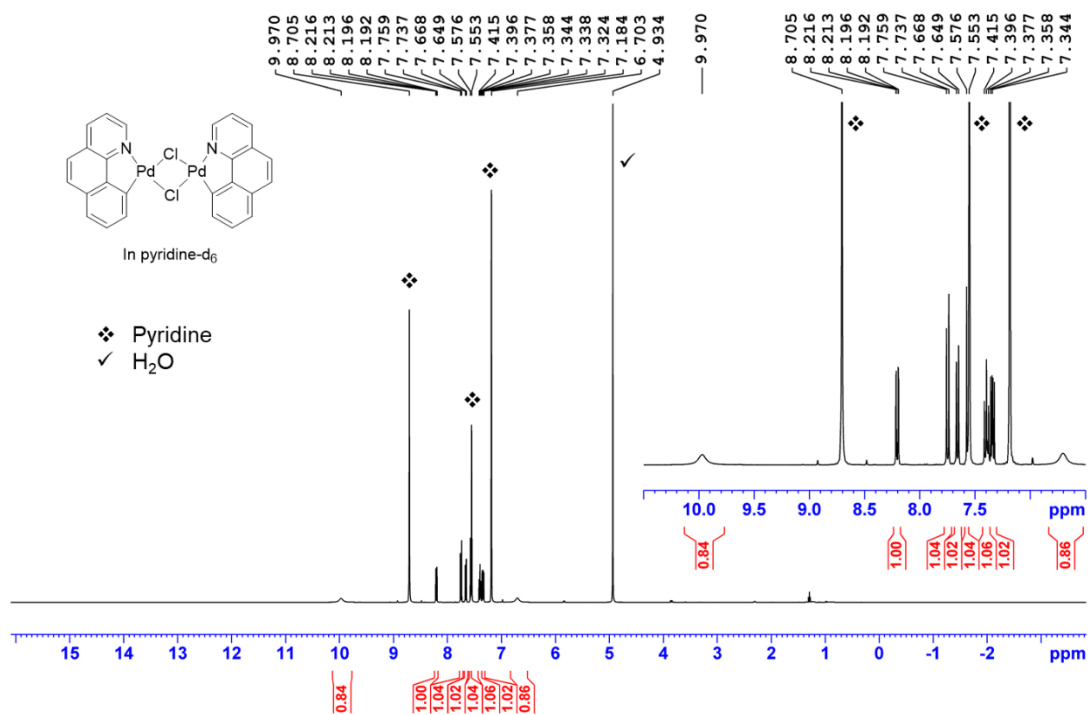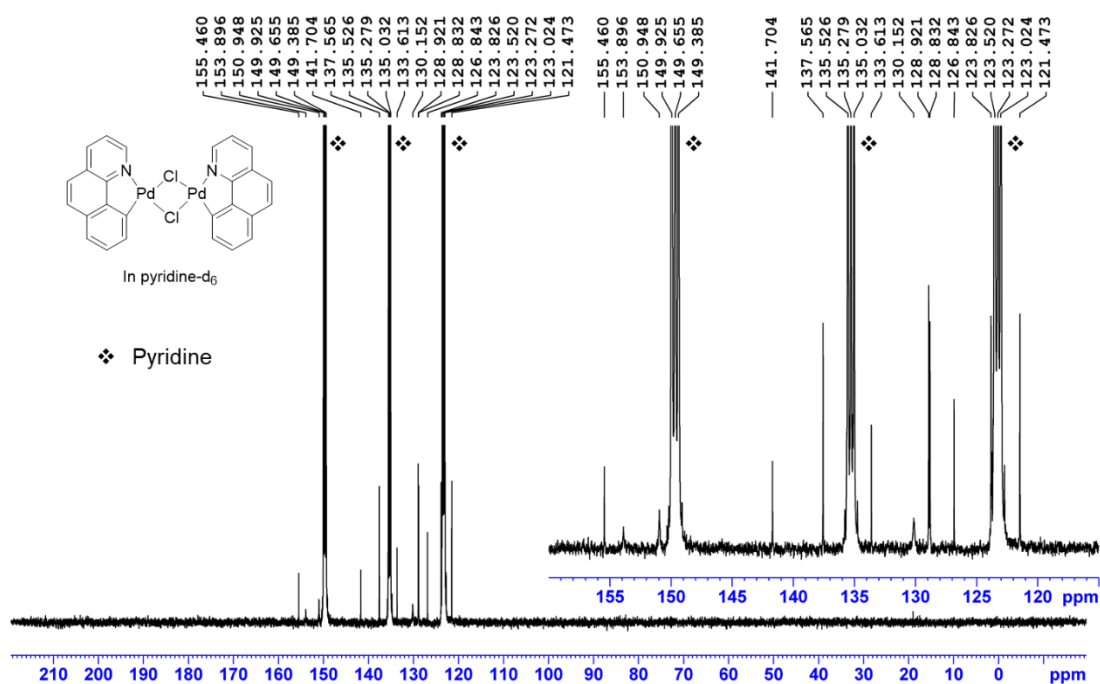

# Supplementary Information

## Product

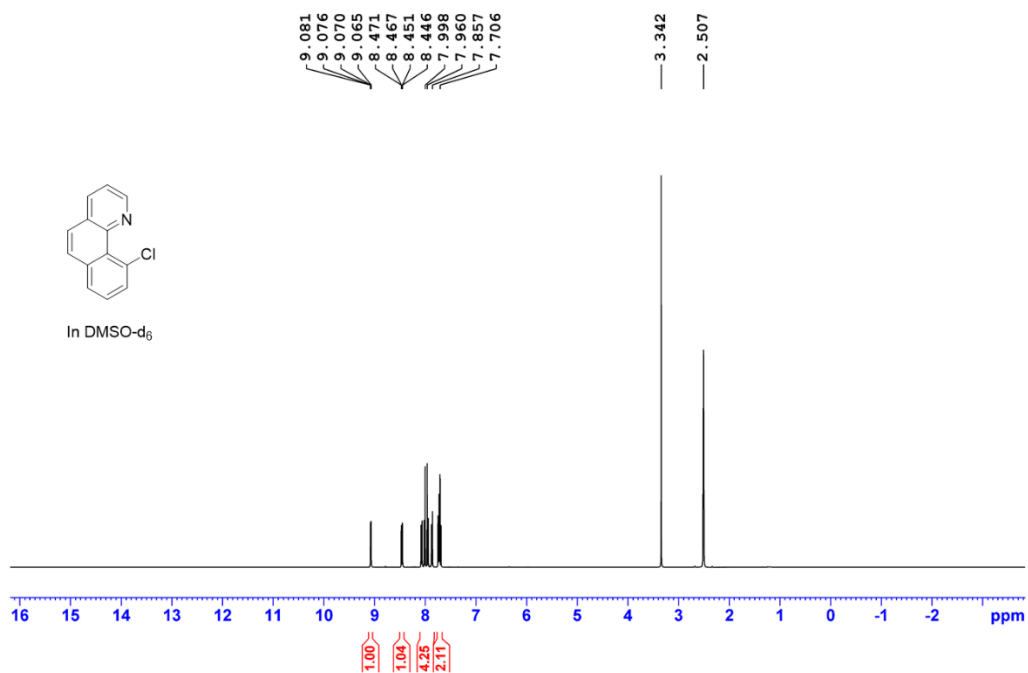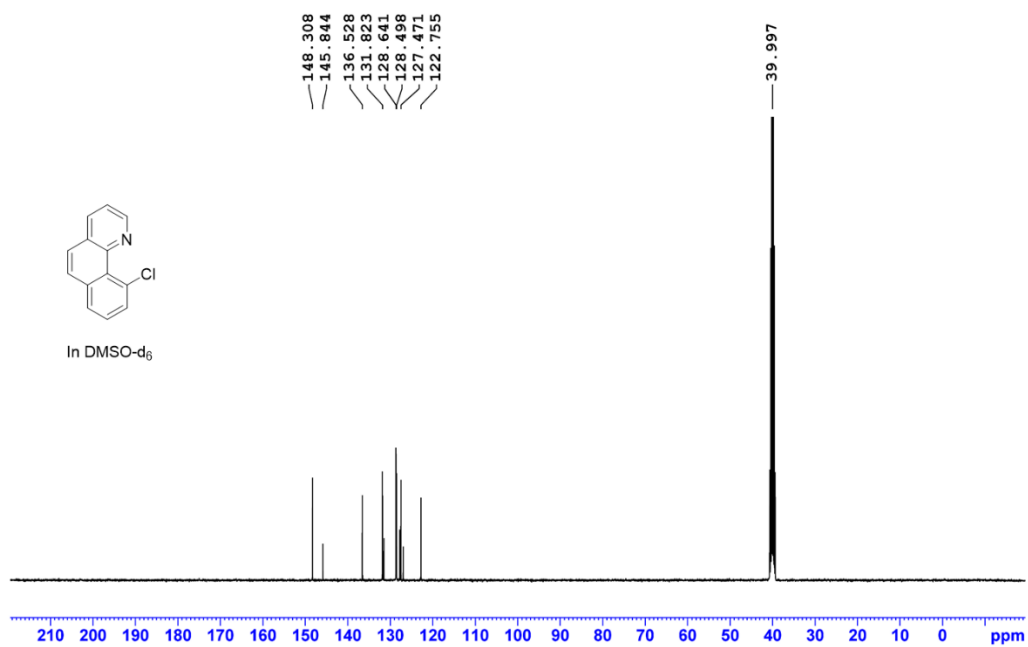

# Supplementary Information

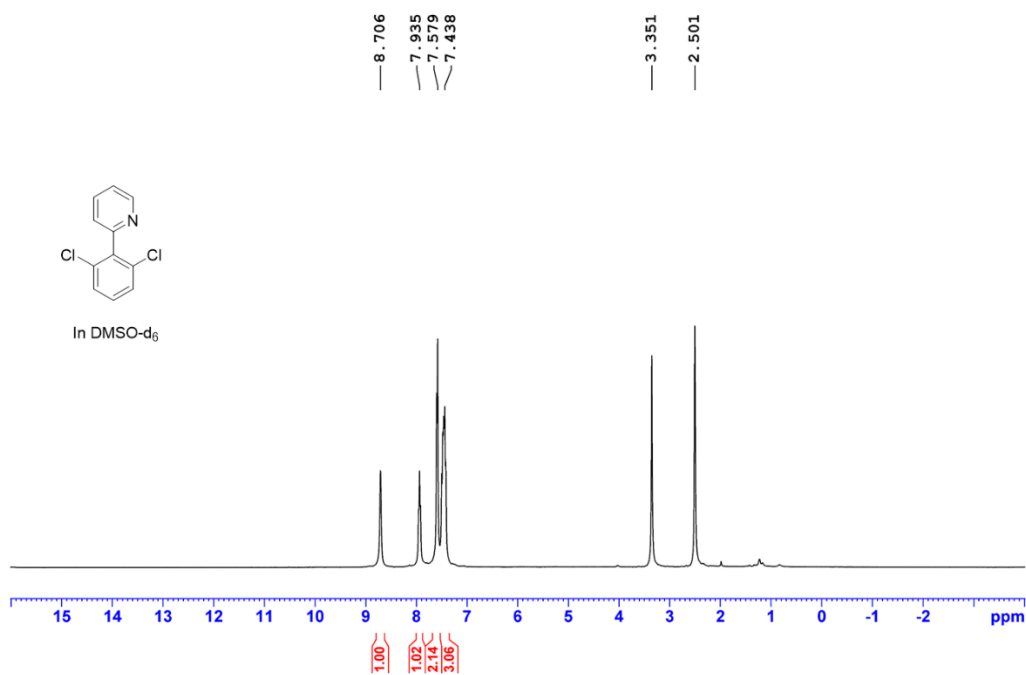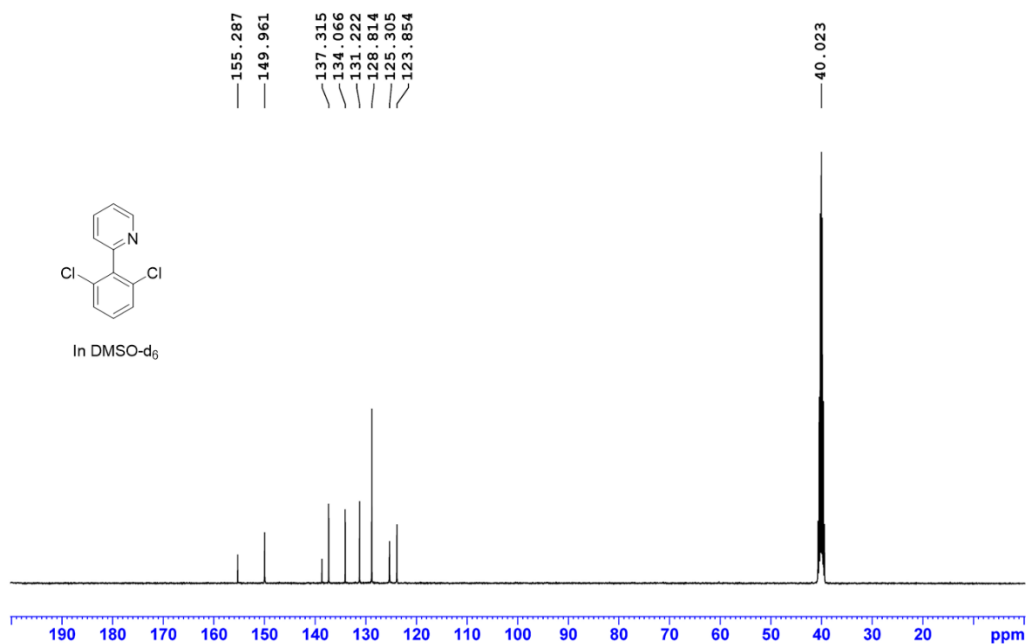

# Supplementary Information

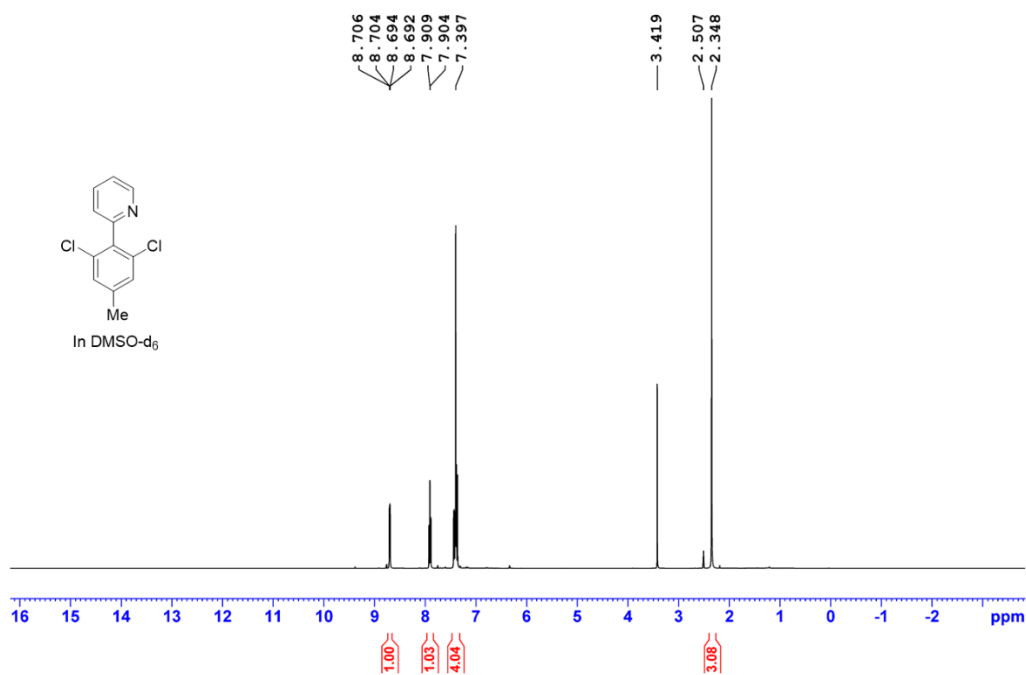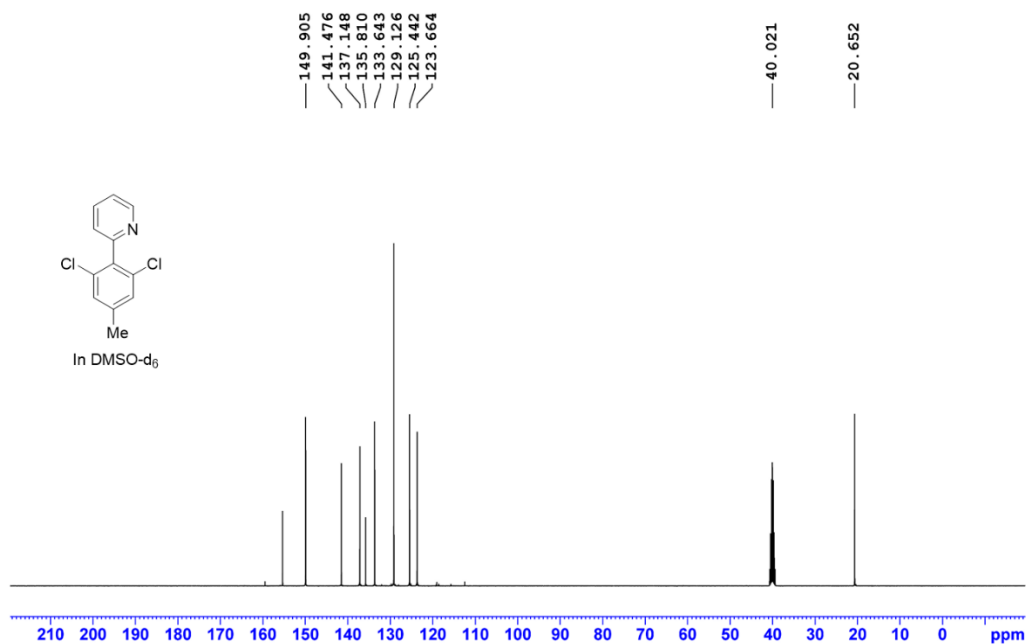

# Supplementary Information

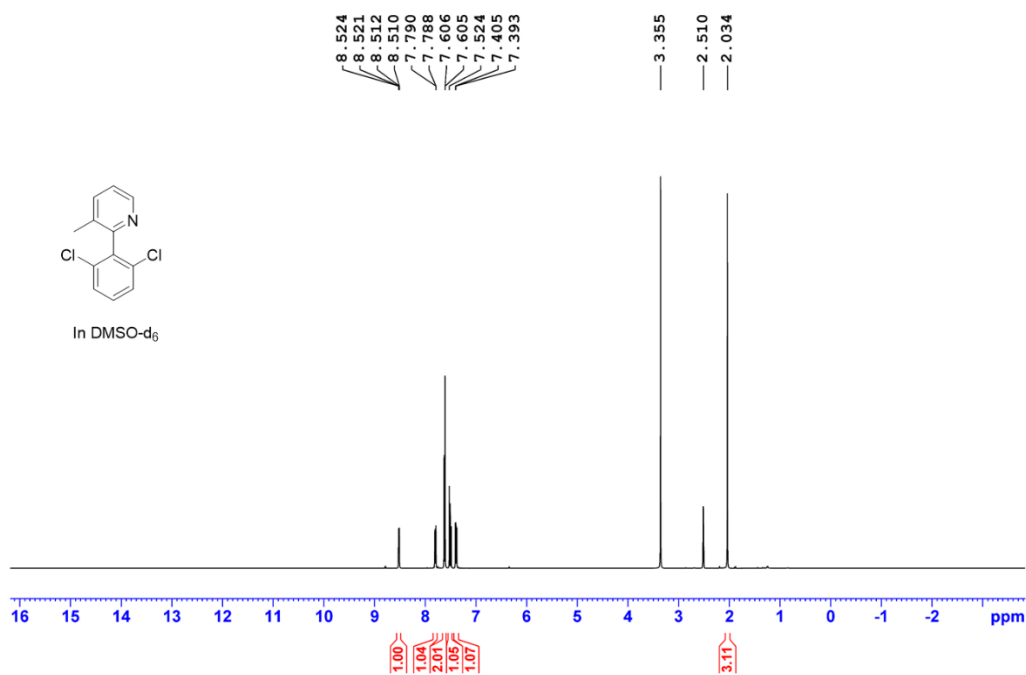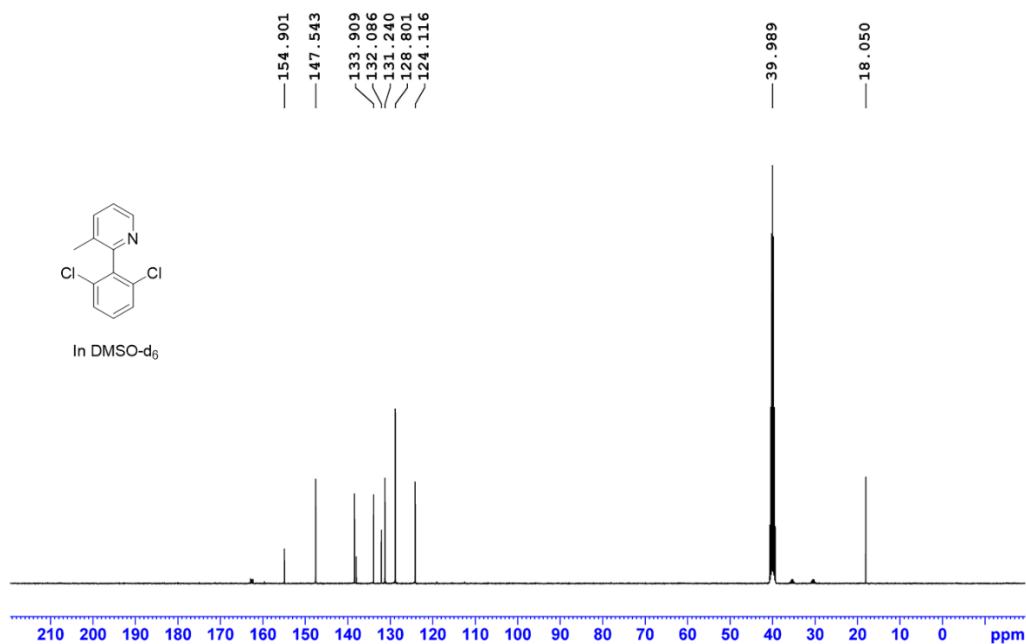

# Supplementary Information

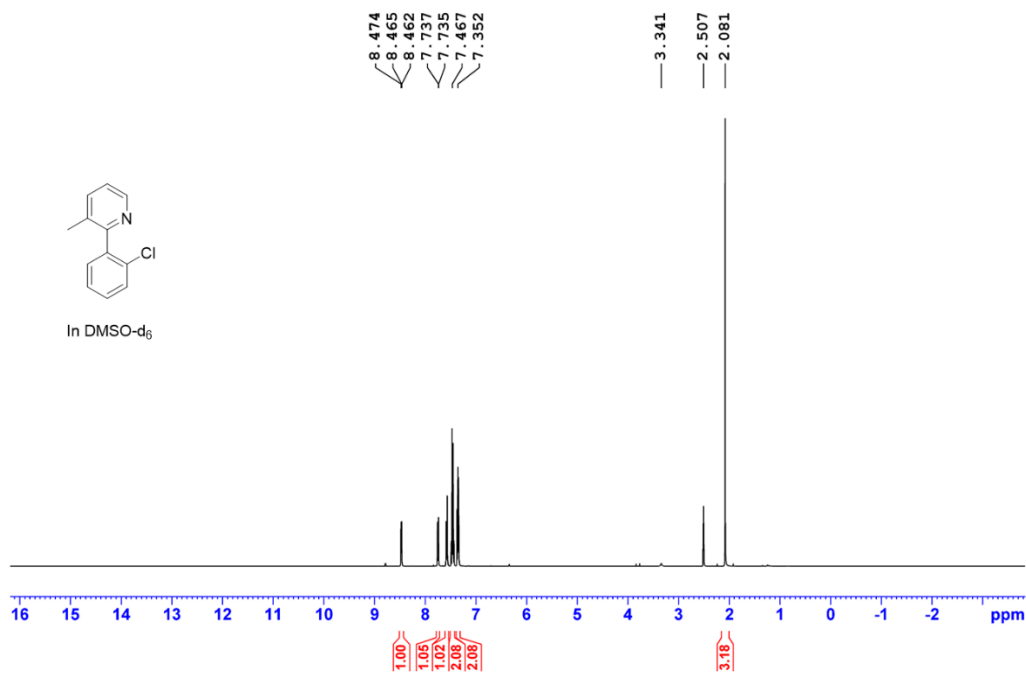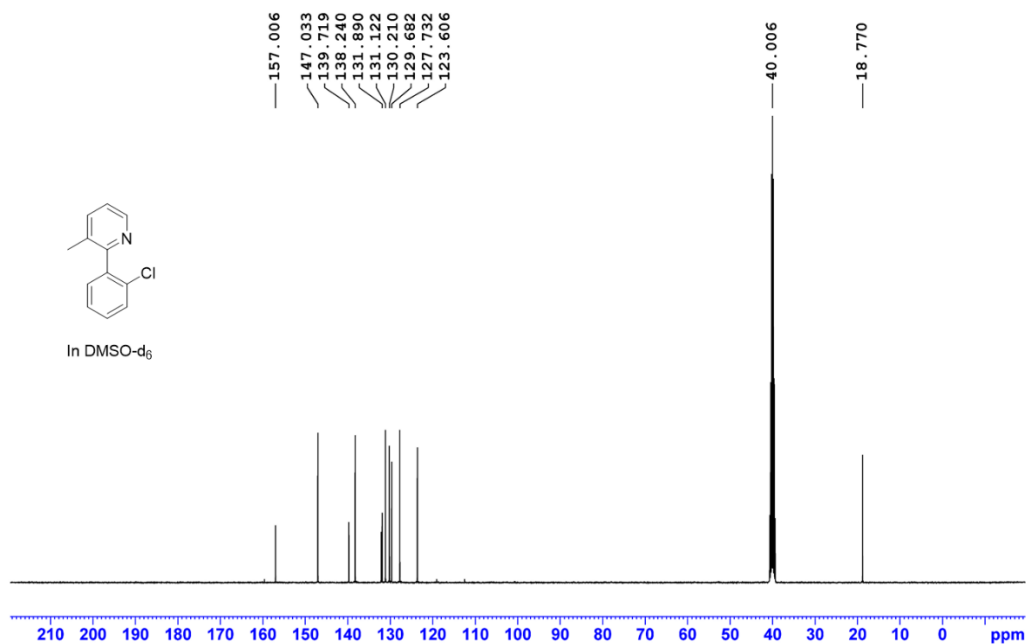

# Supplementary Information

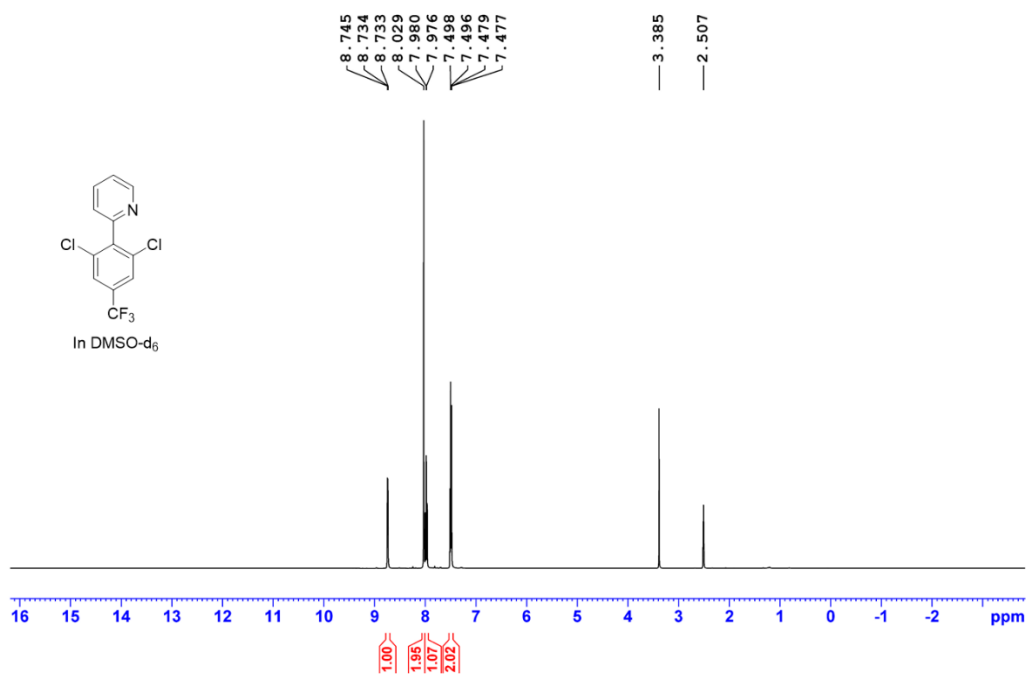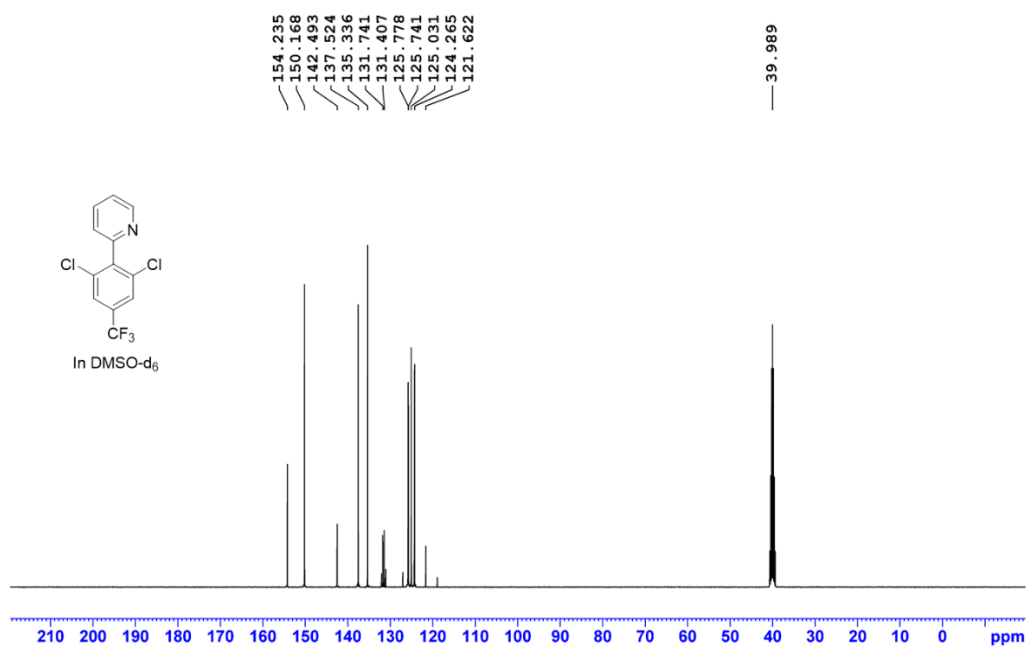

# Supplementary Information

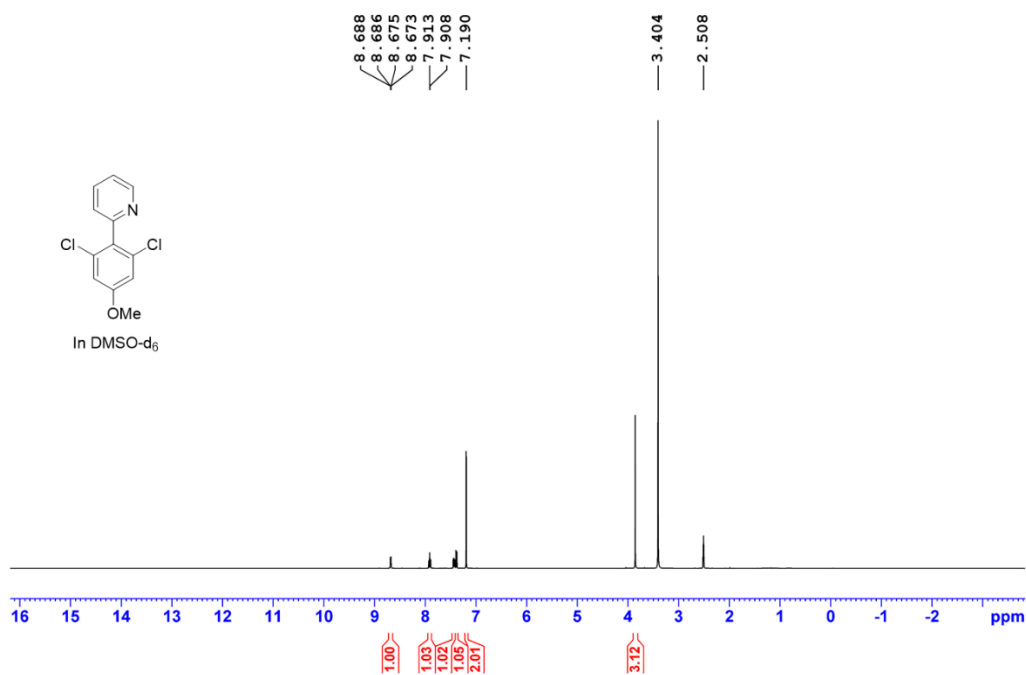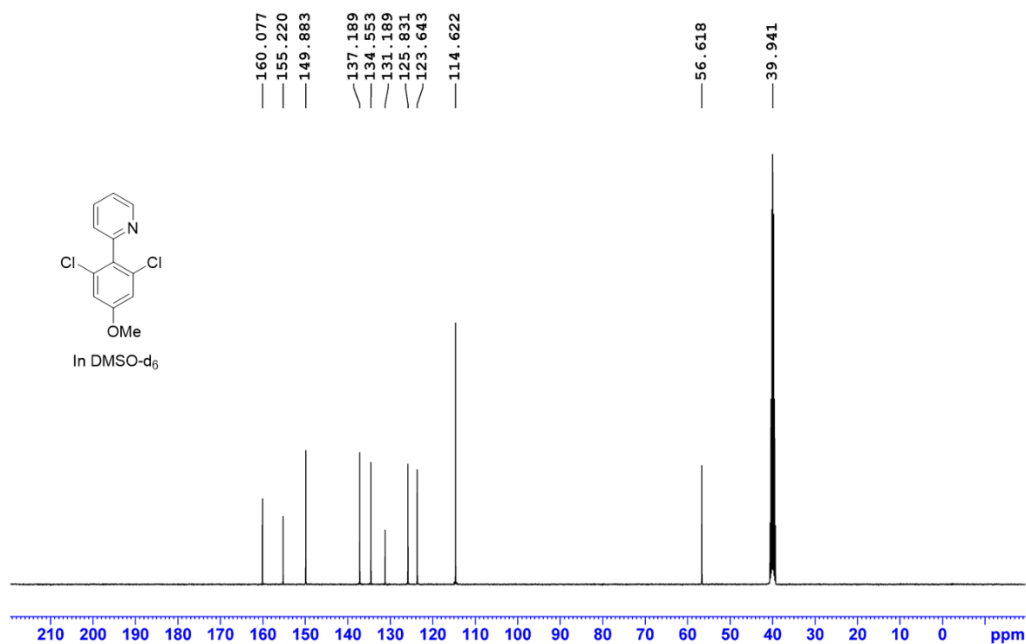

# Supplementary Information

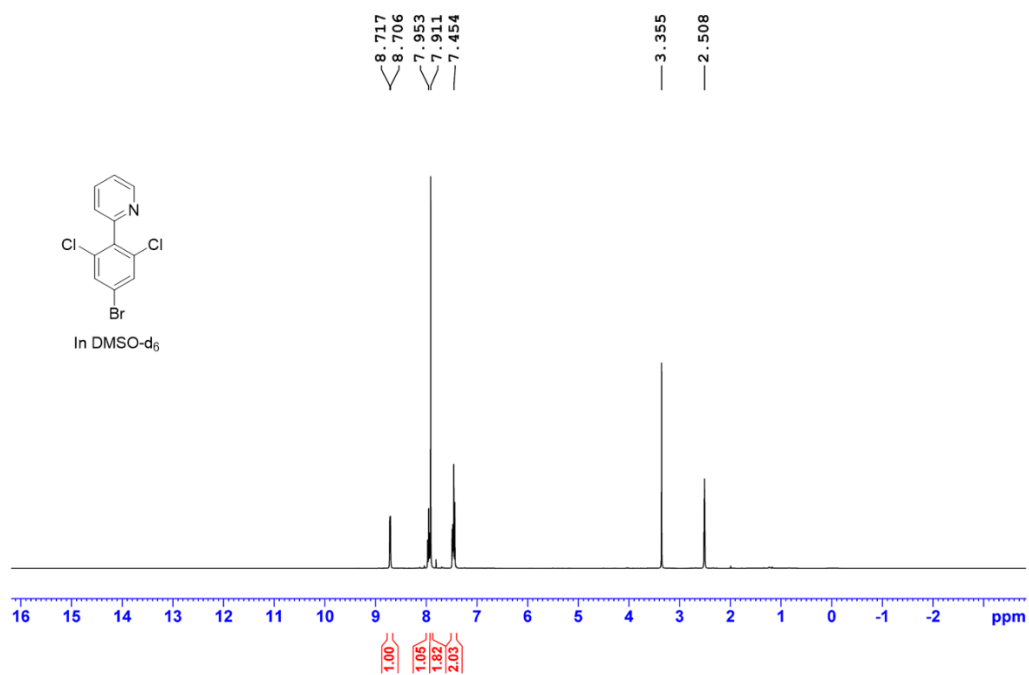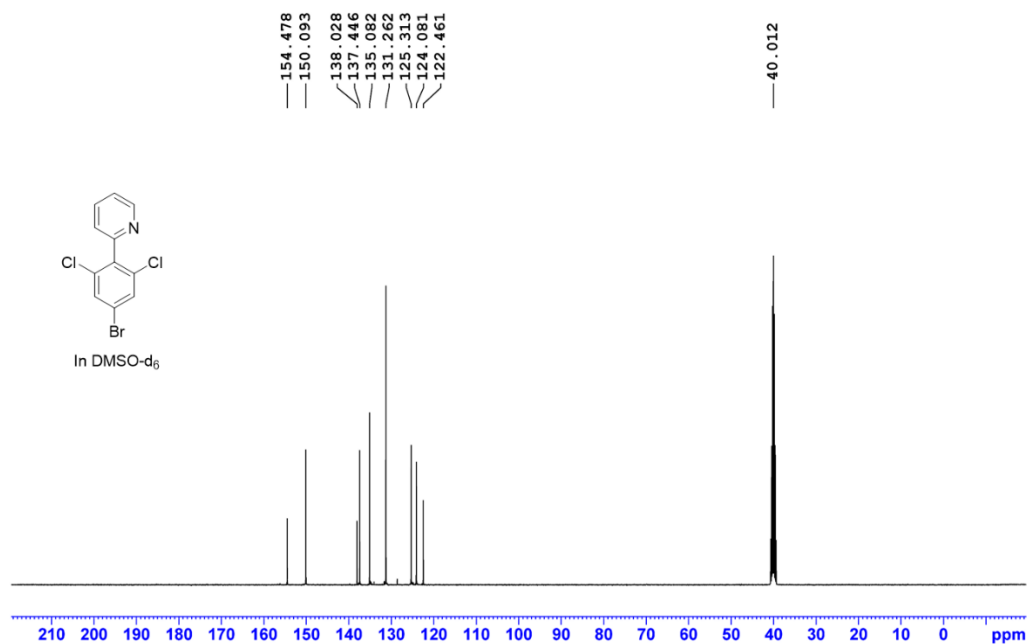

# Supplementary Information

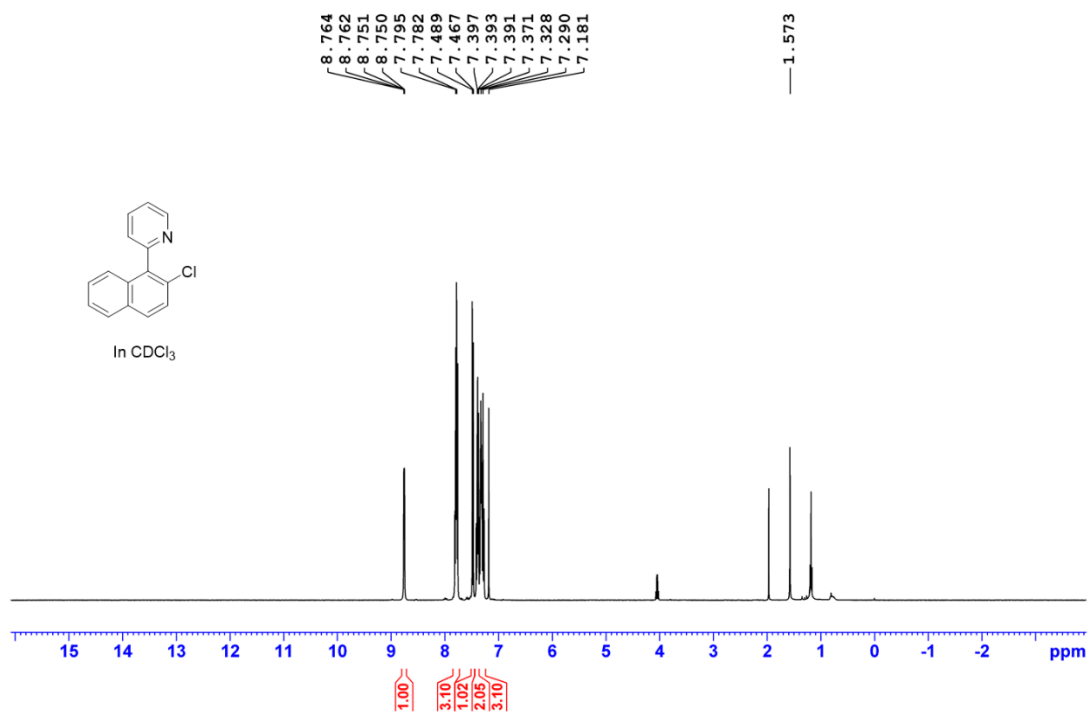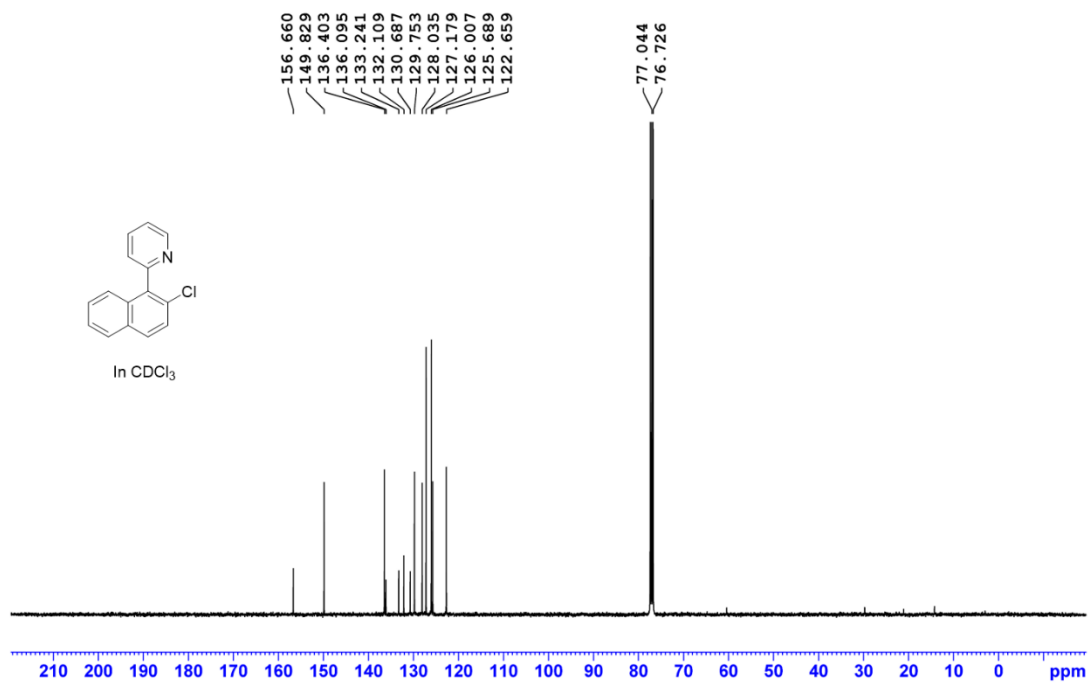

# Supplementary Information

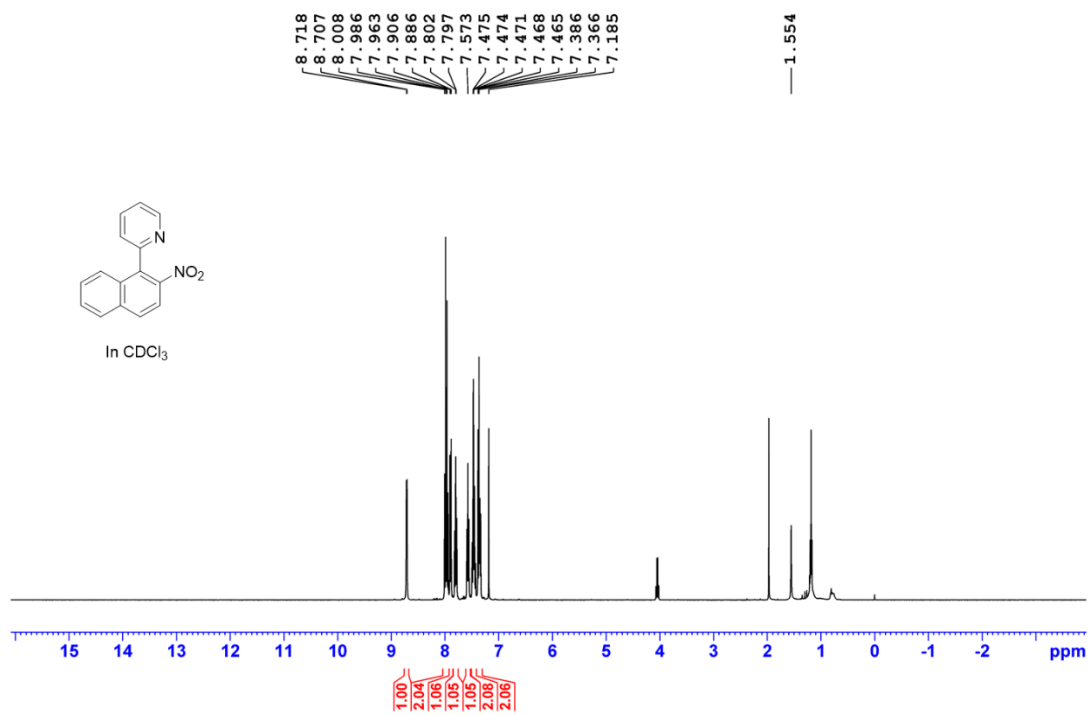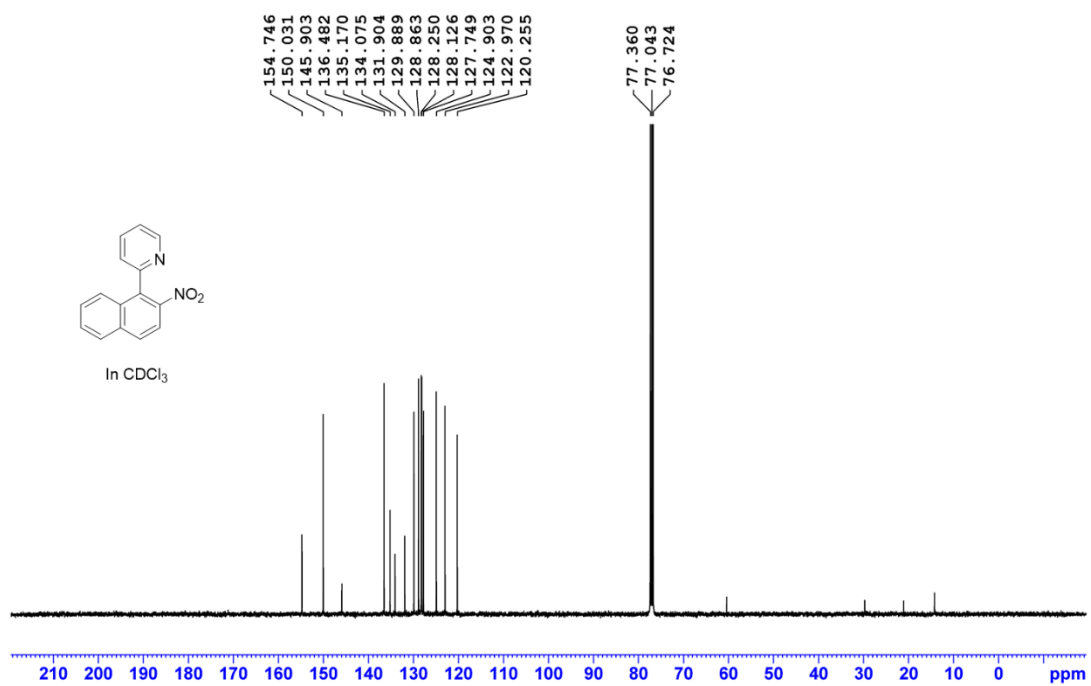

# Supplementary Information

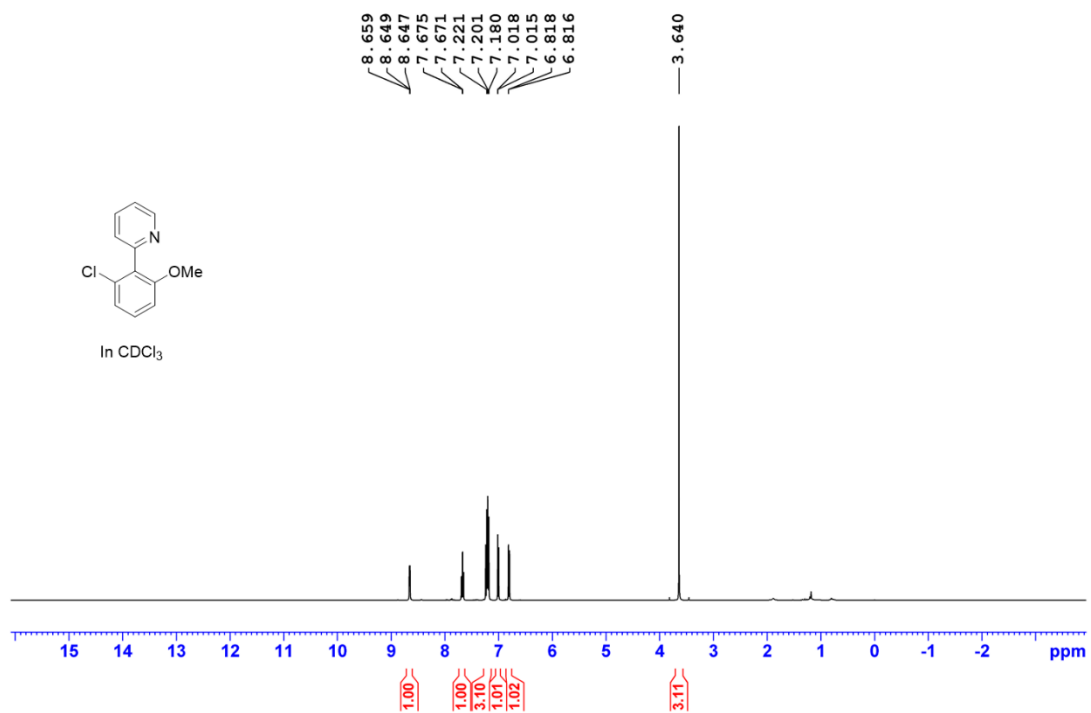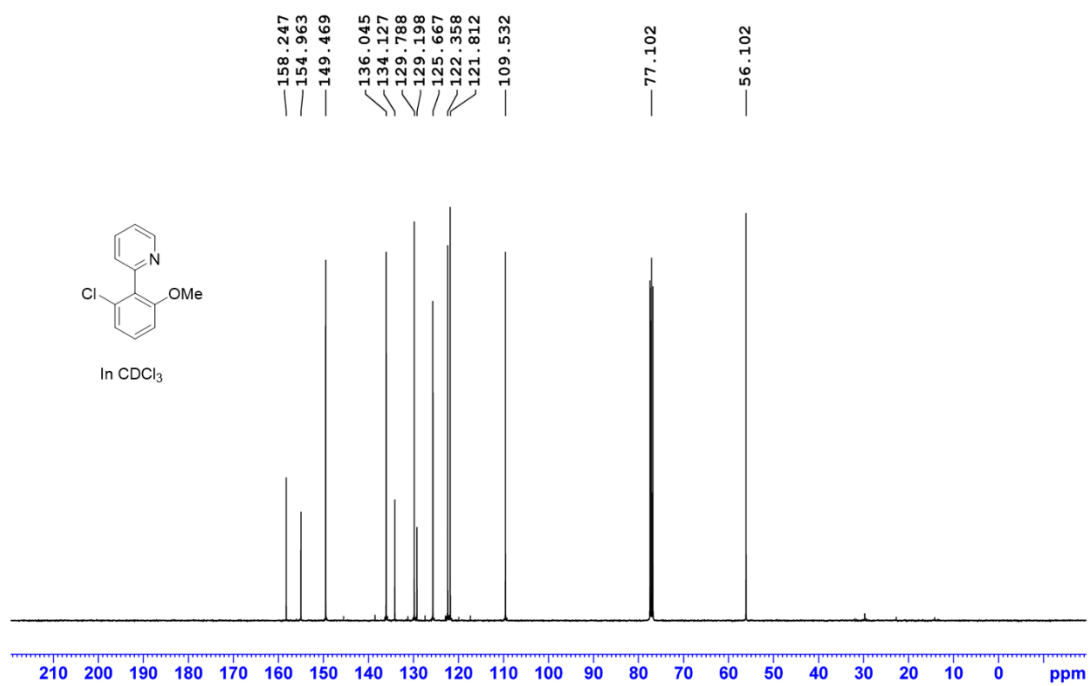

# Supplementary Information

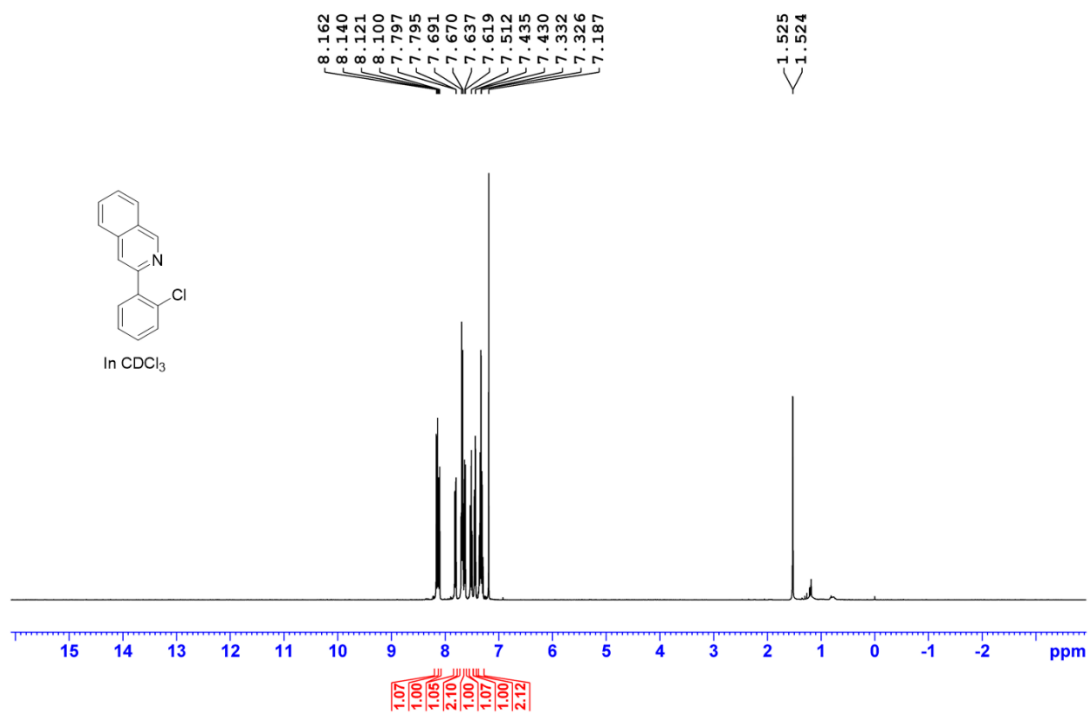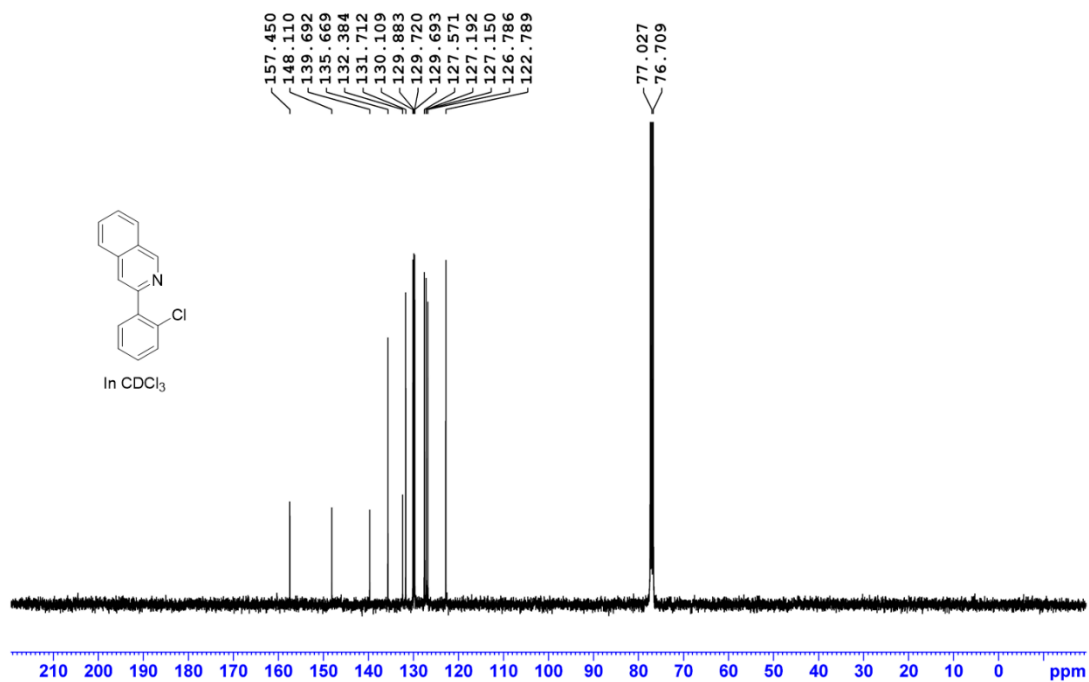

# Supplementary Information

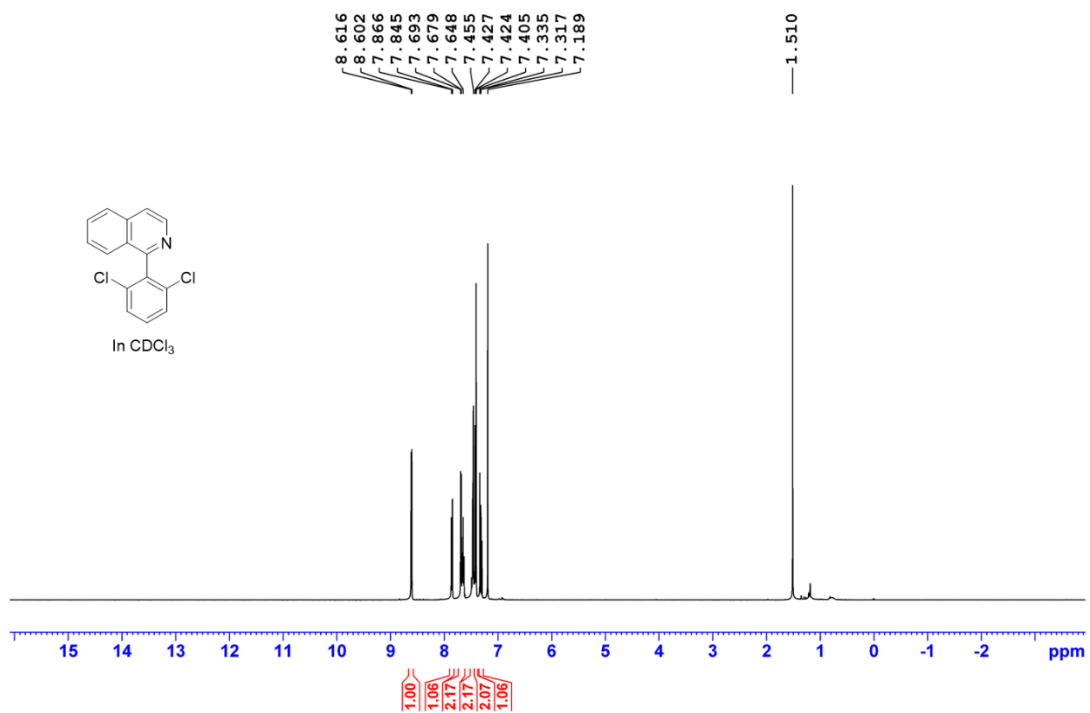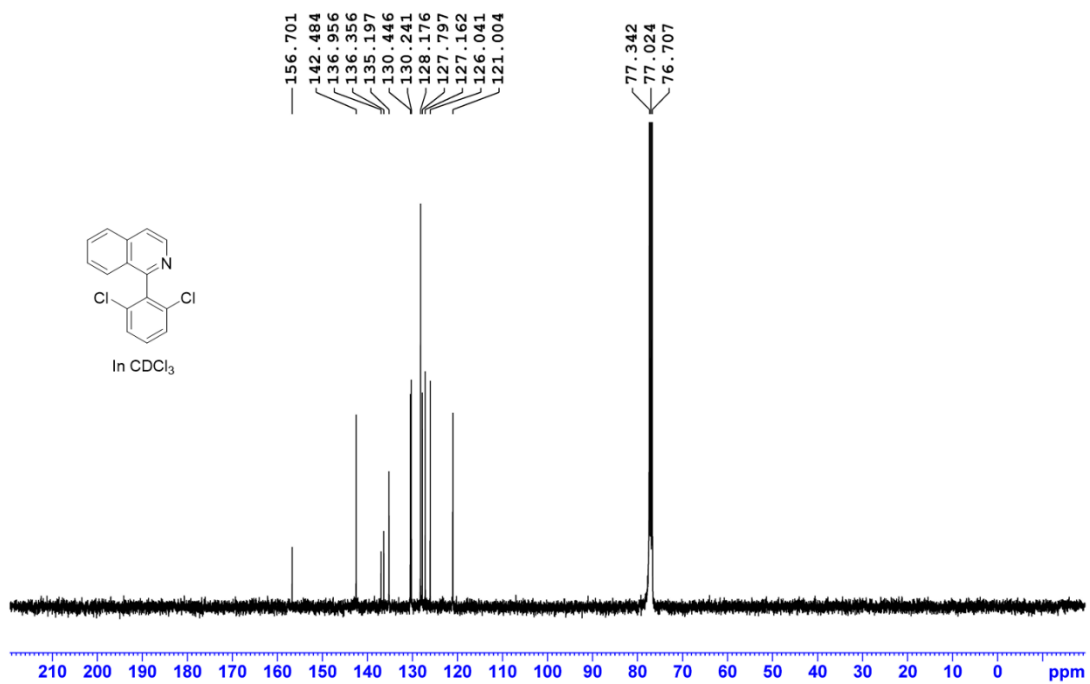

# Supplementary Information

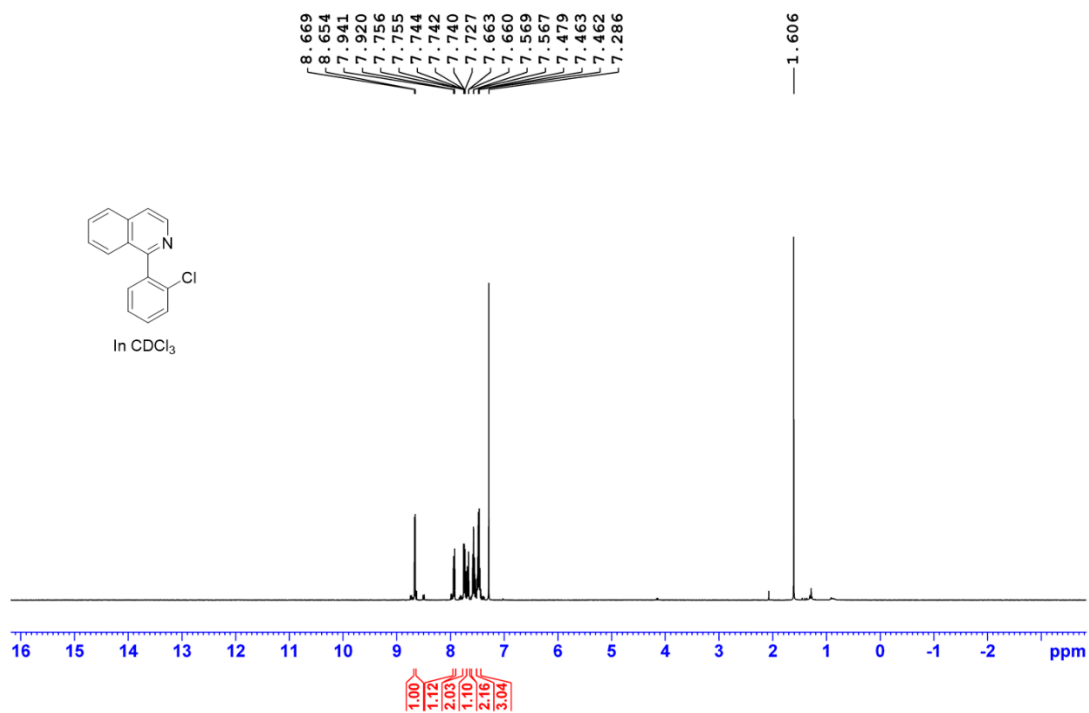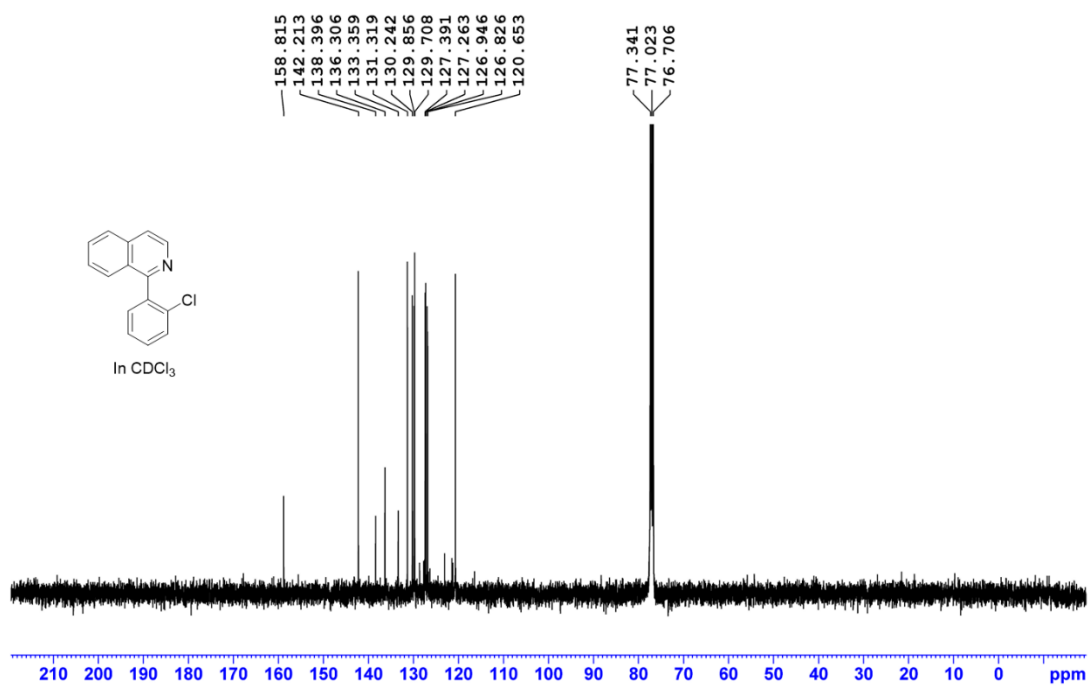

# Supplementary Information

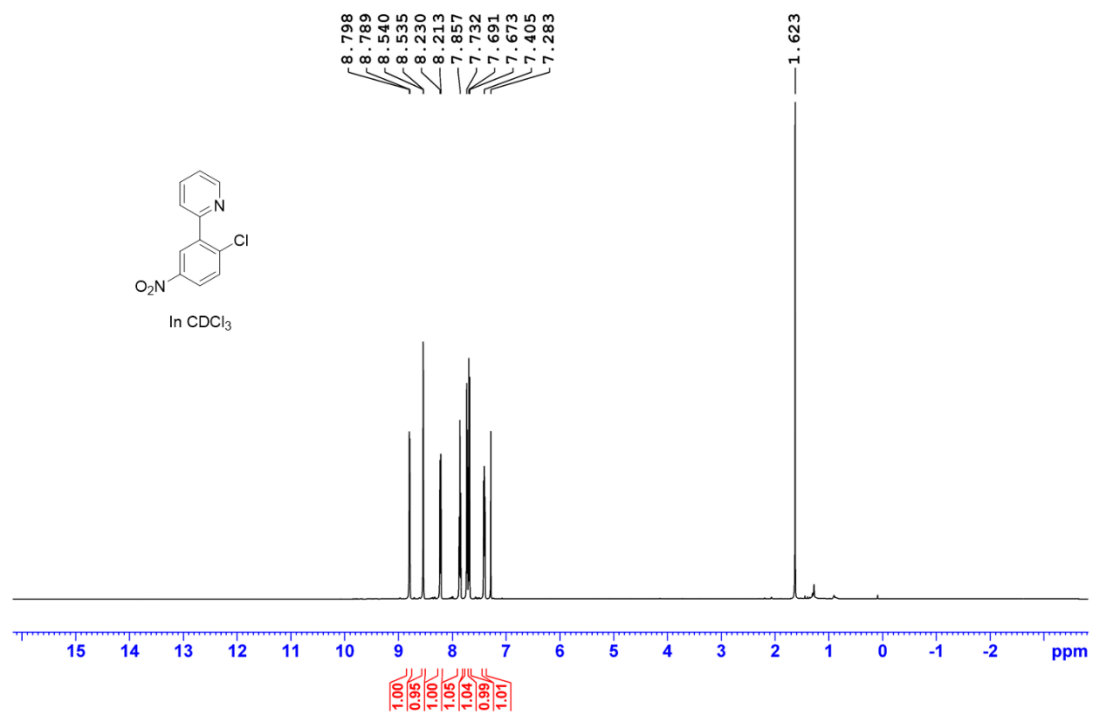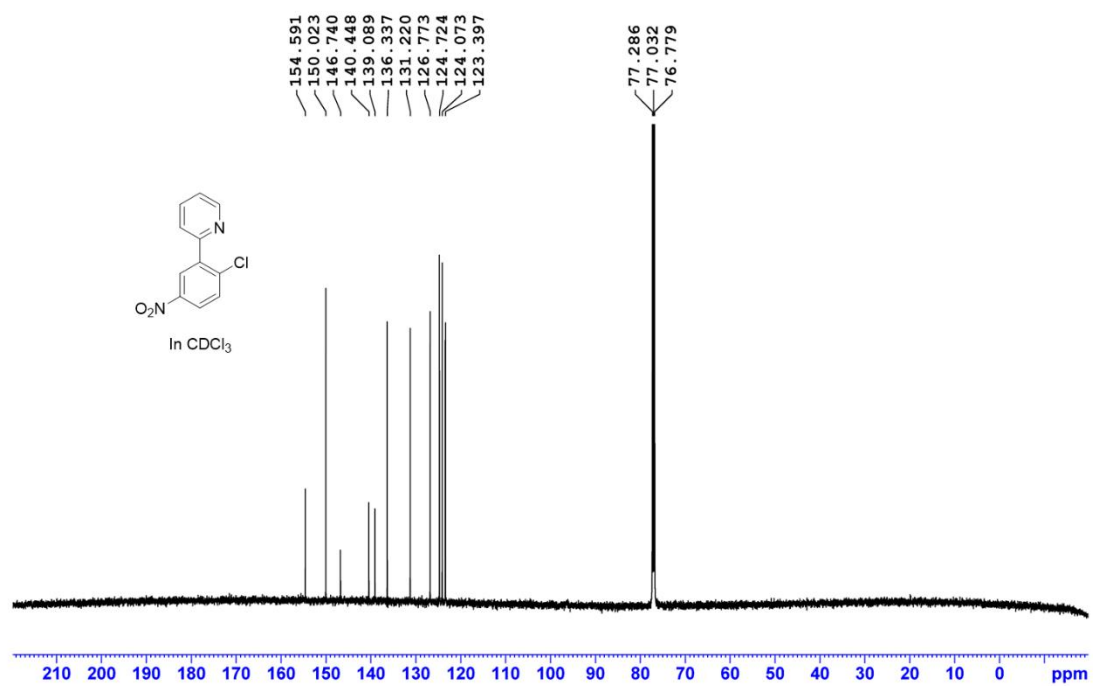

# Supplementary Information

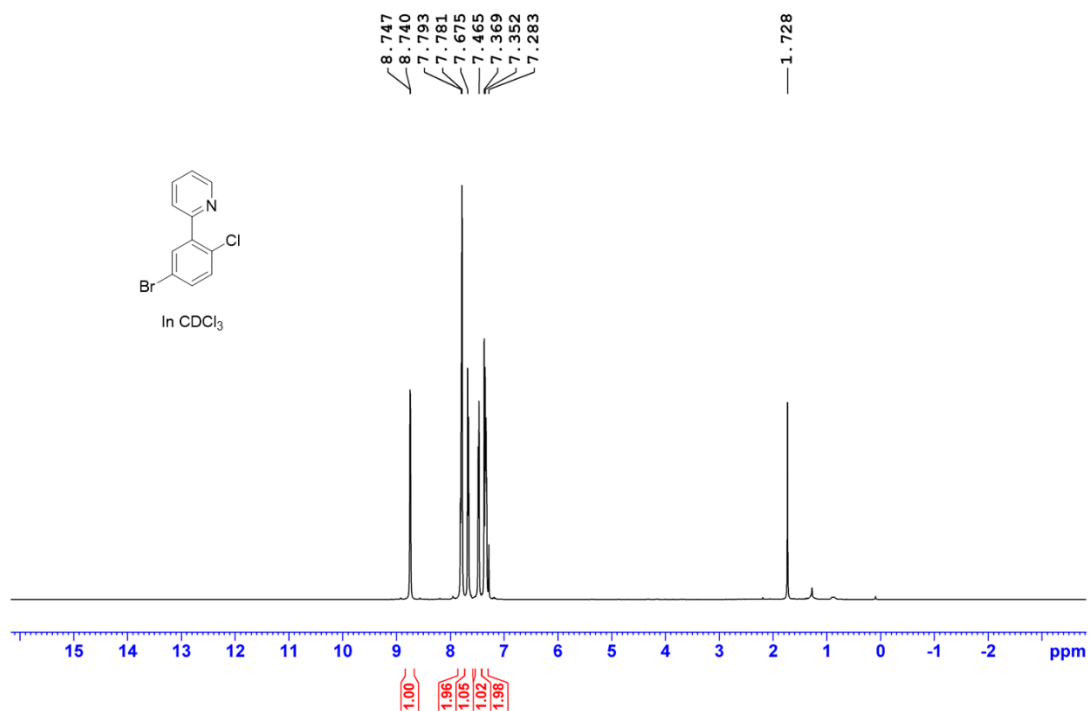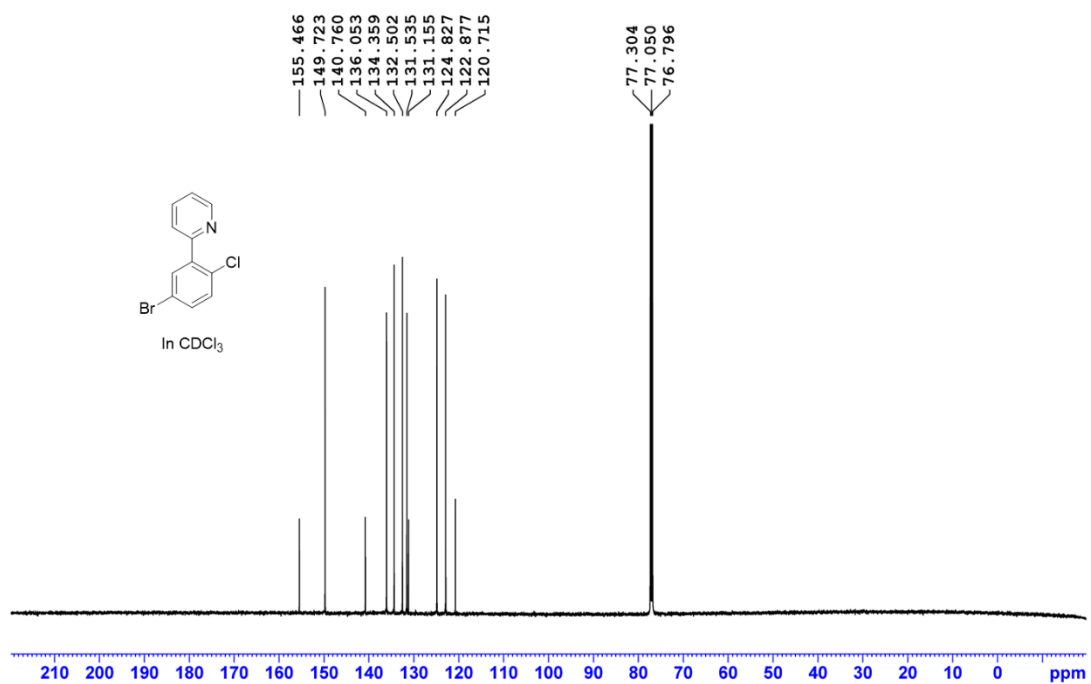

# Supplementary Information

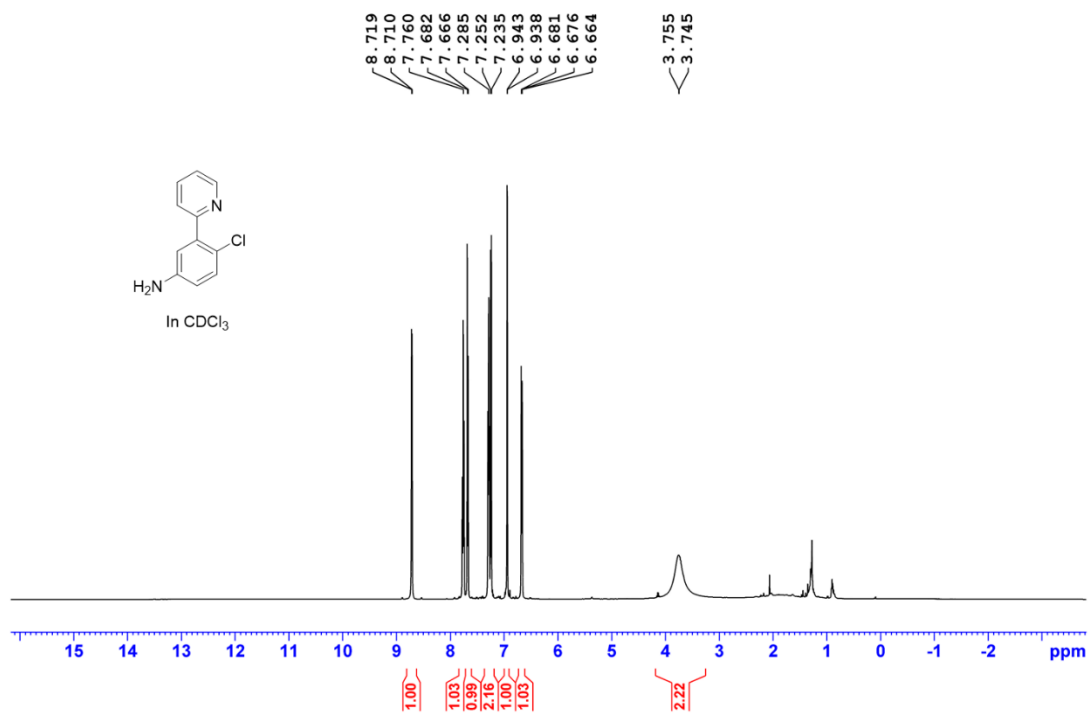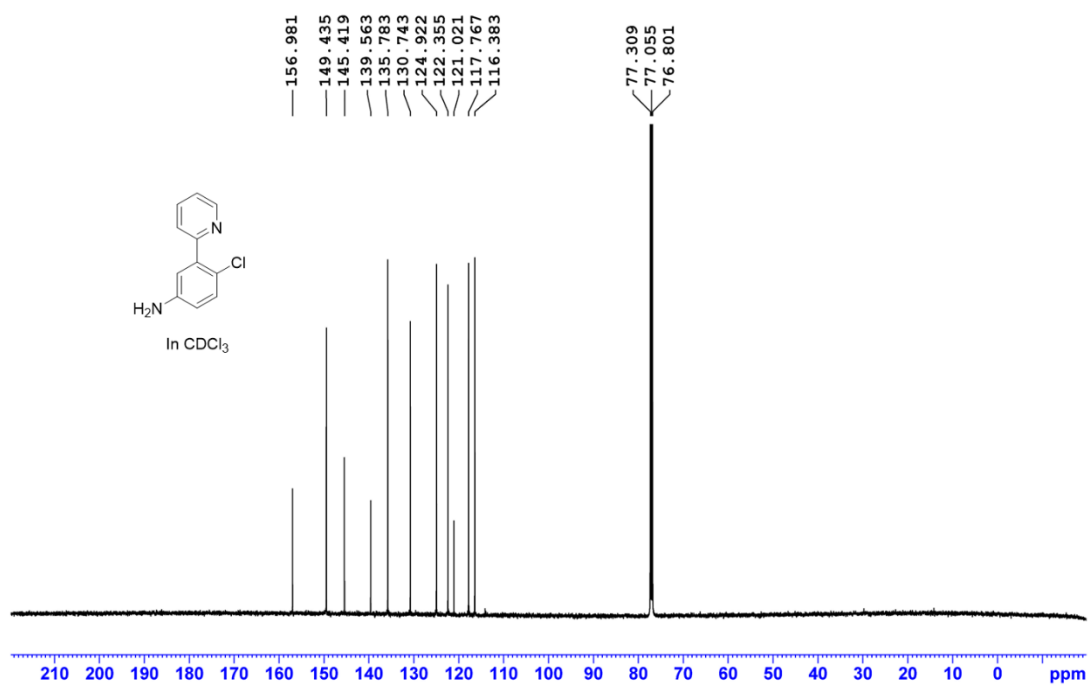

# Supplementary Information

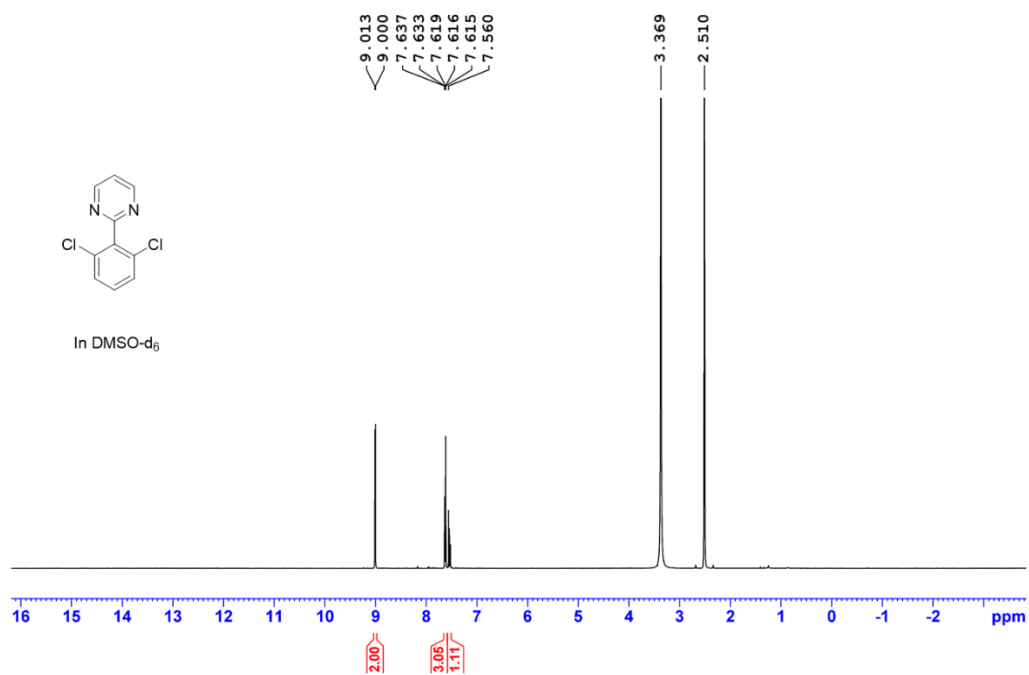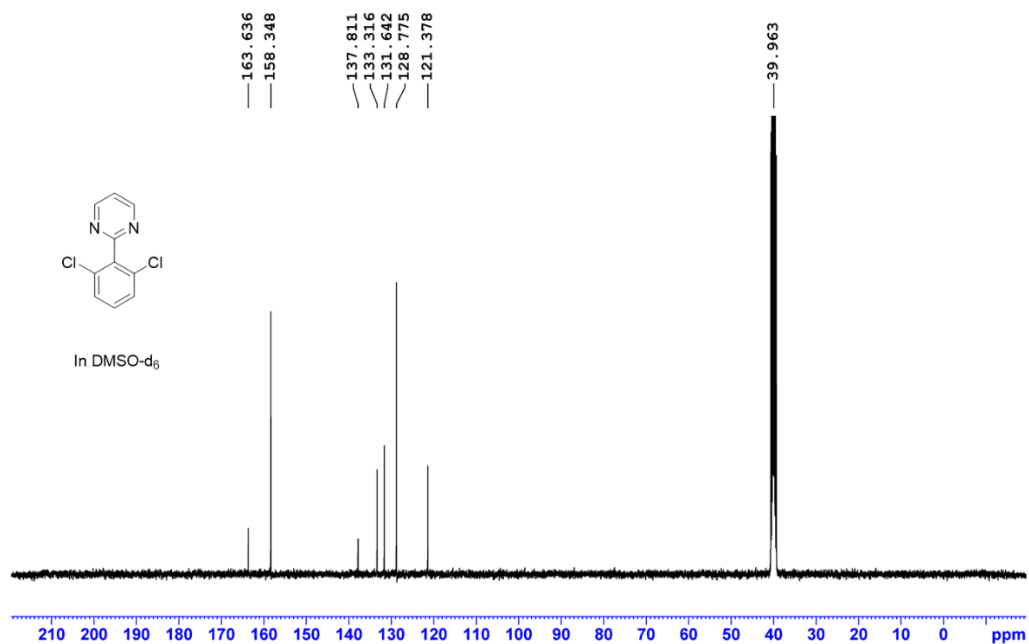

# Supplementary Information

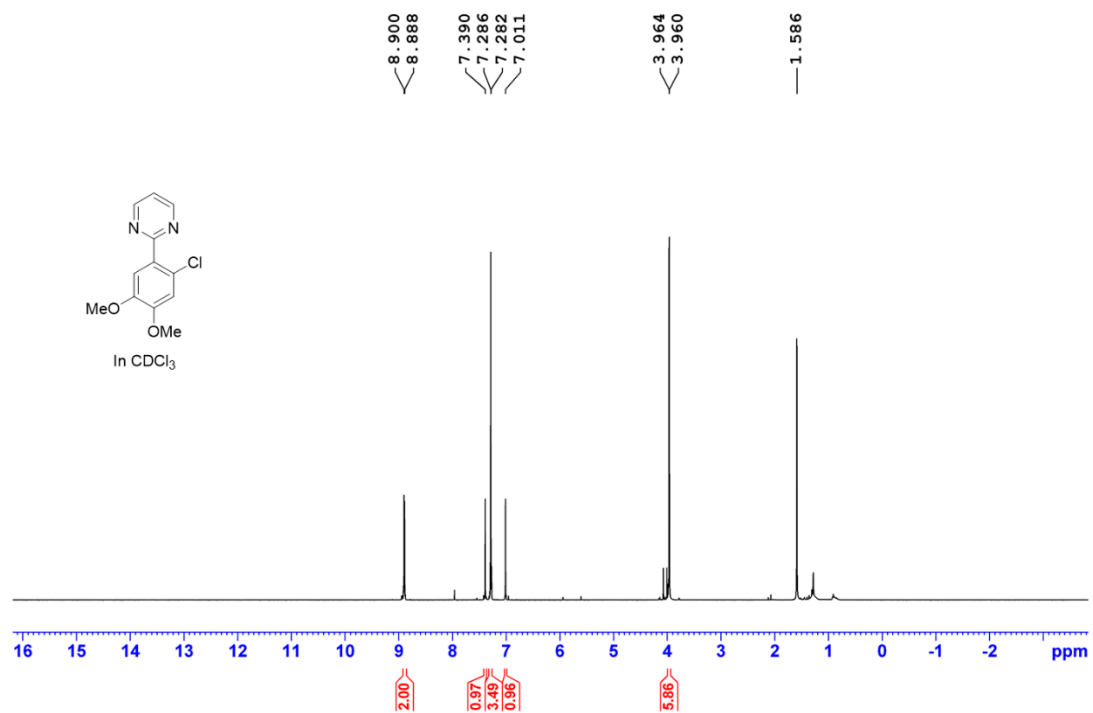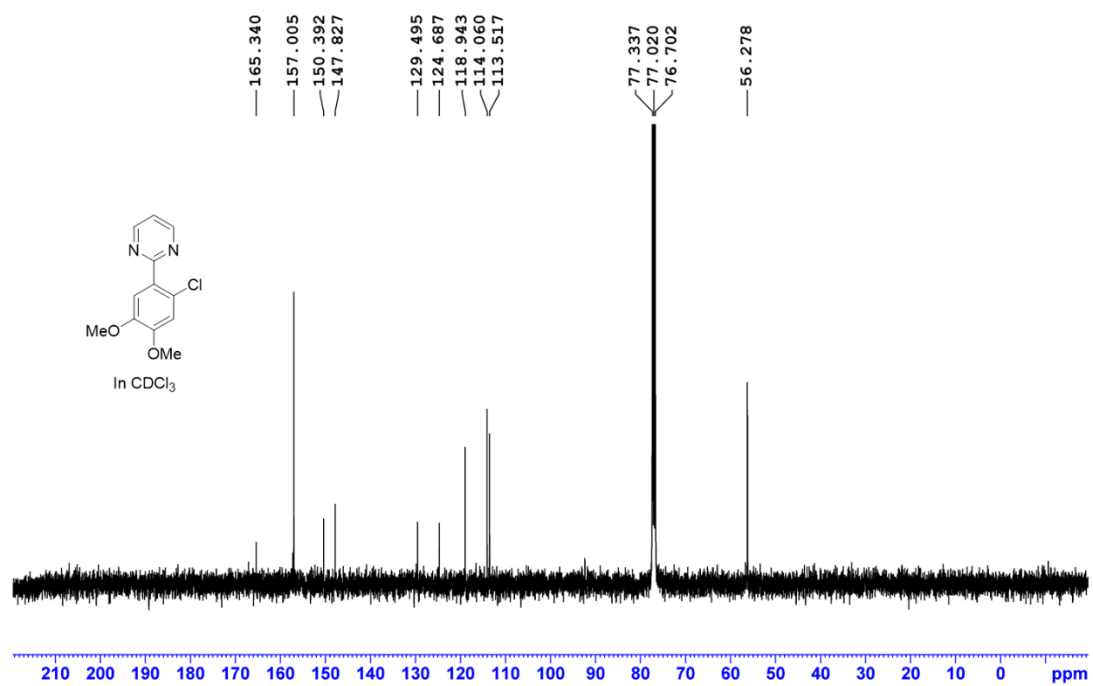

# Supplementary Information

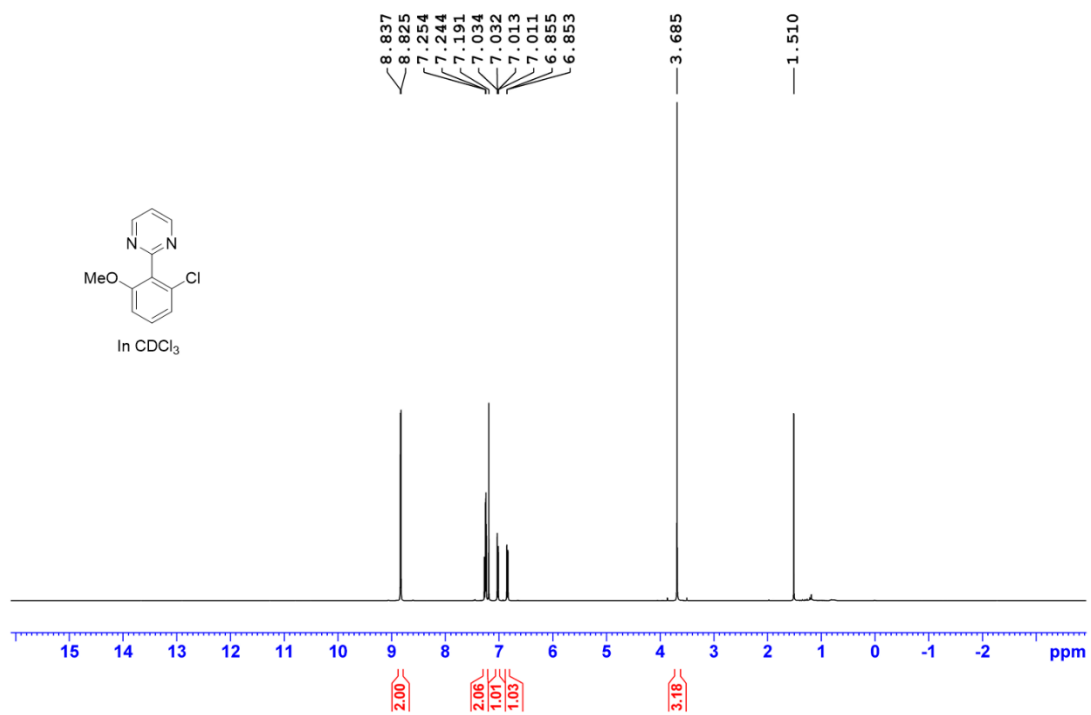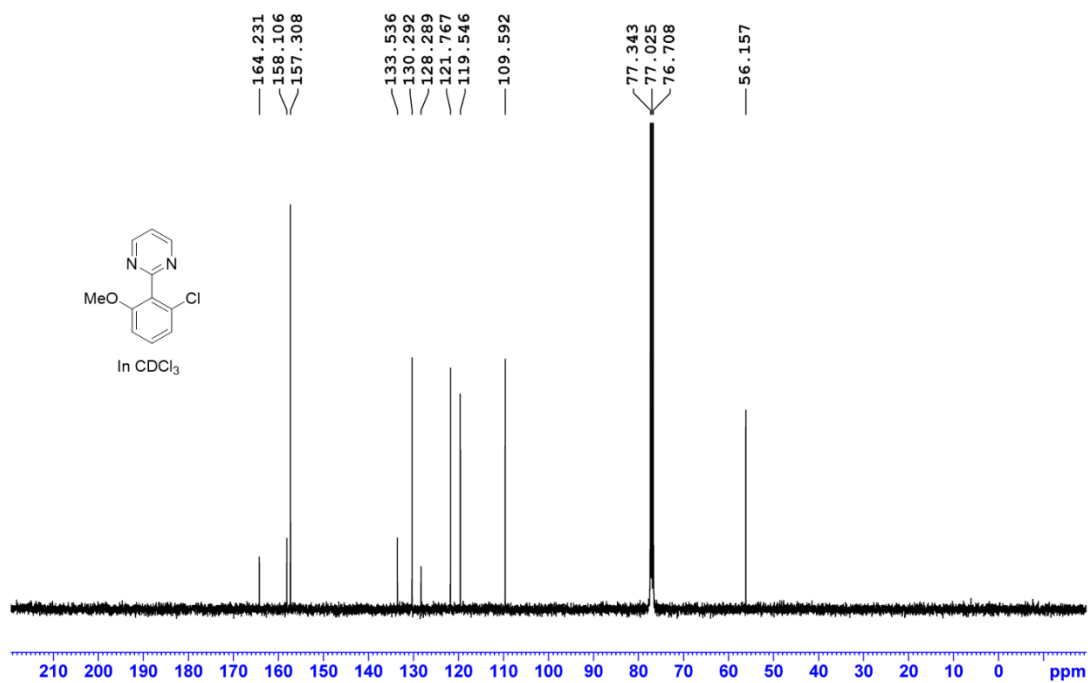

# Supplementary Information

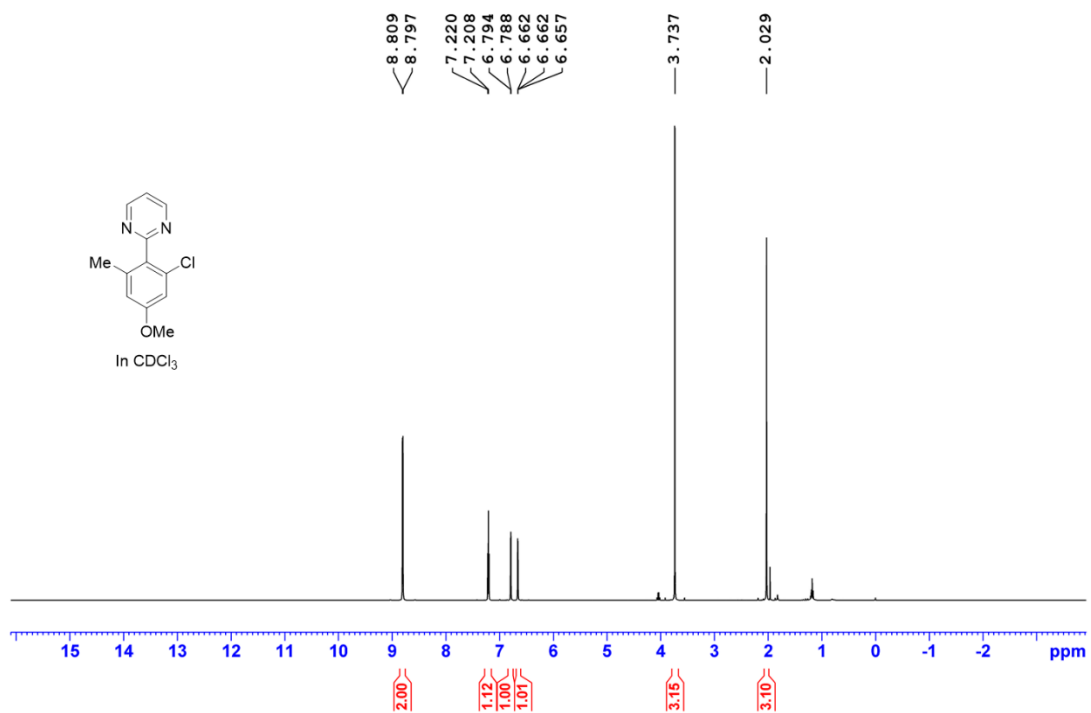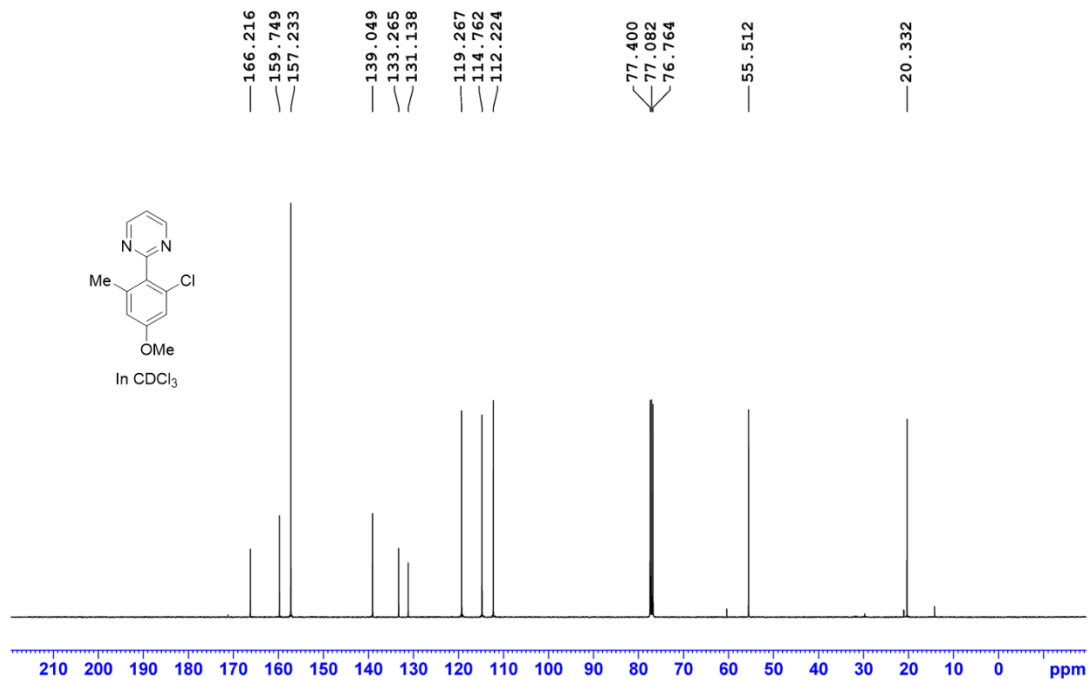

# Supplementary Information

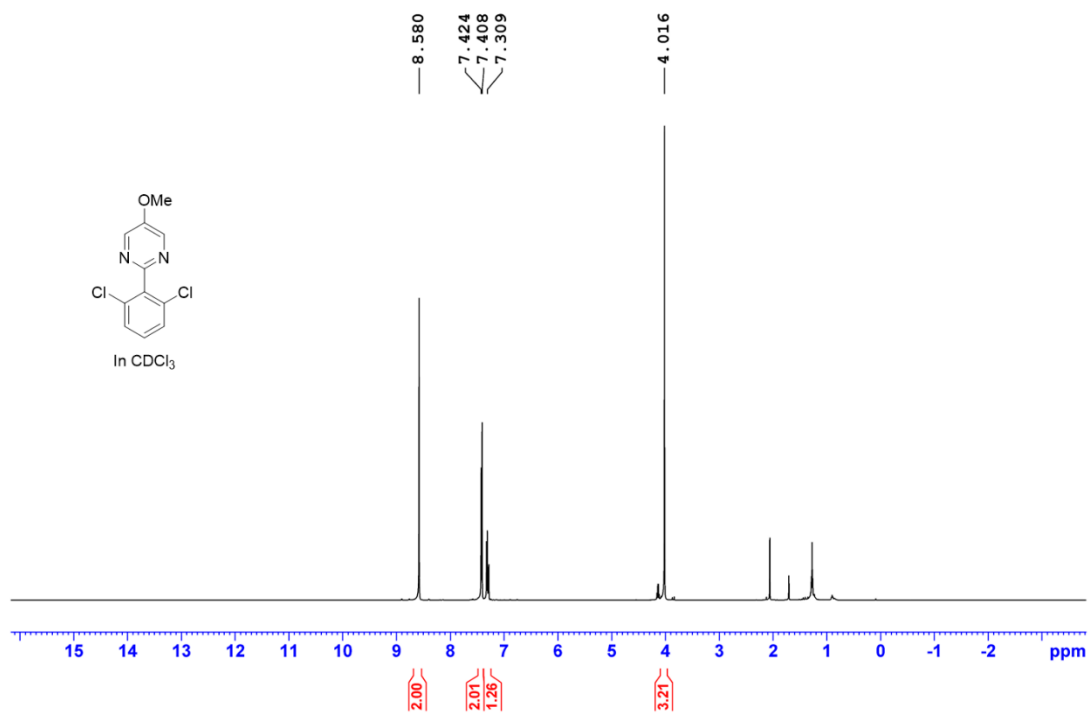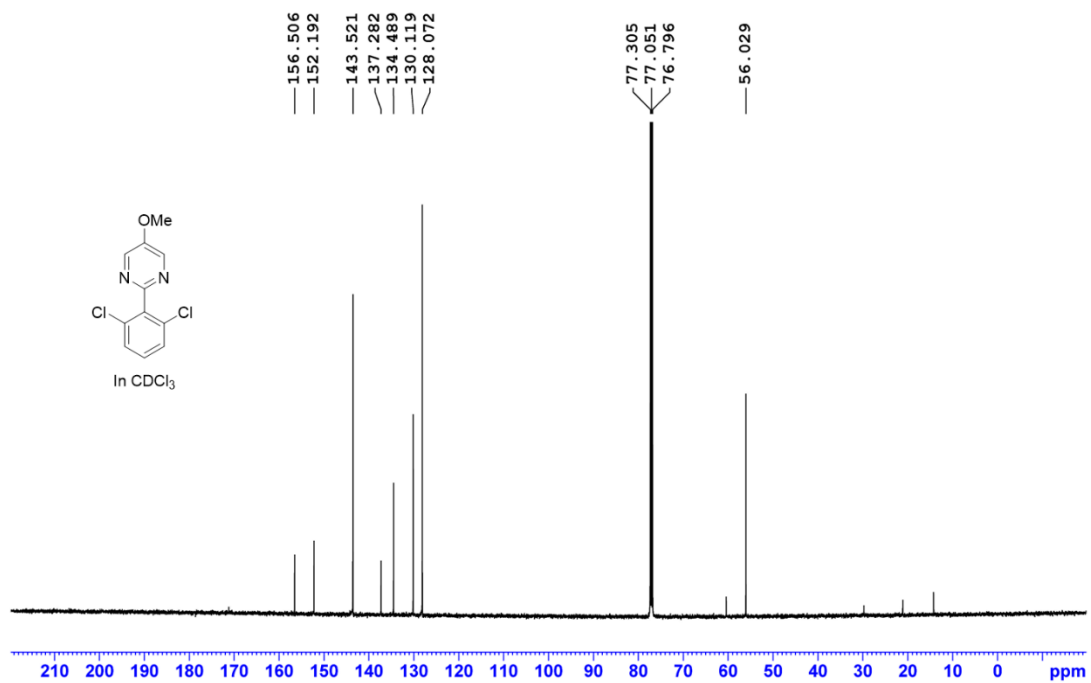

# Supplementary Information

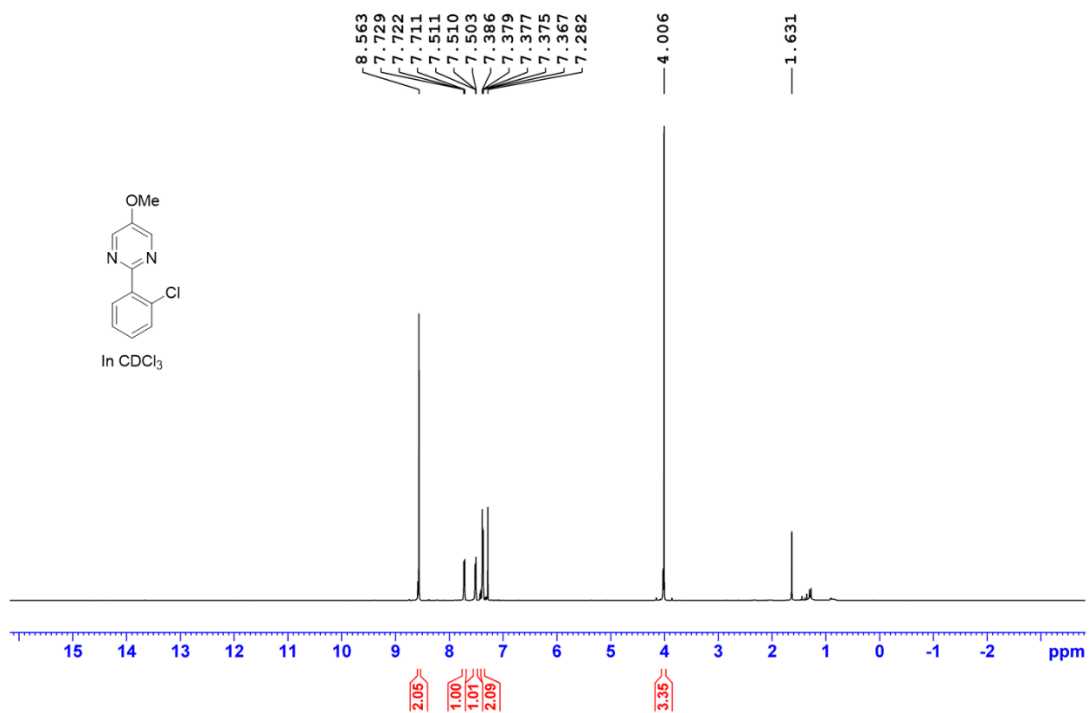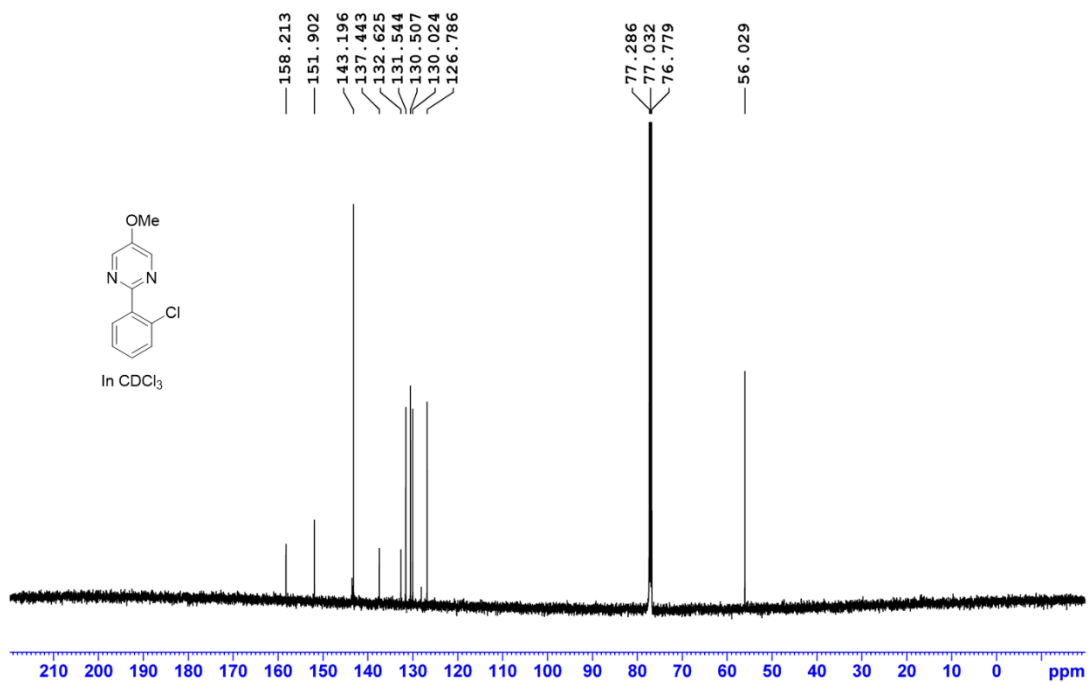

# Supplementary Information

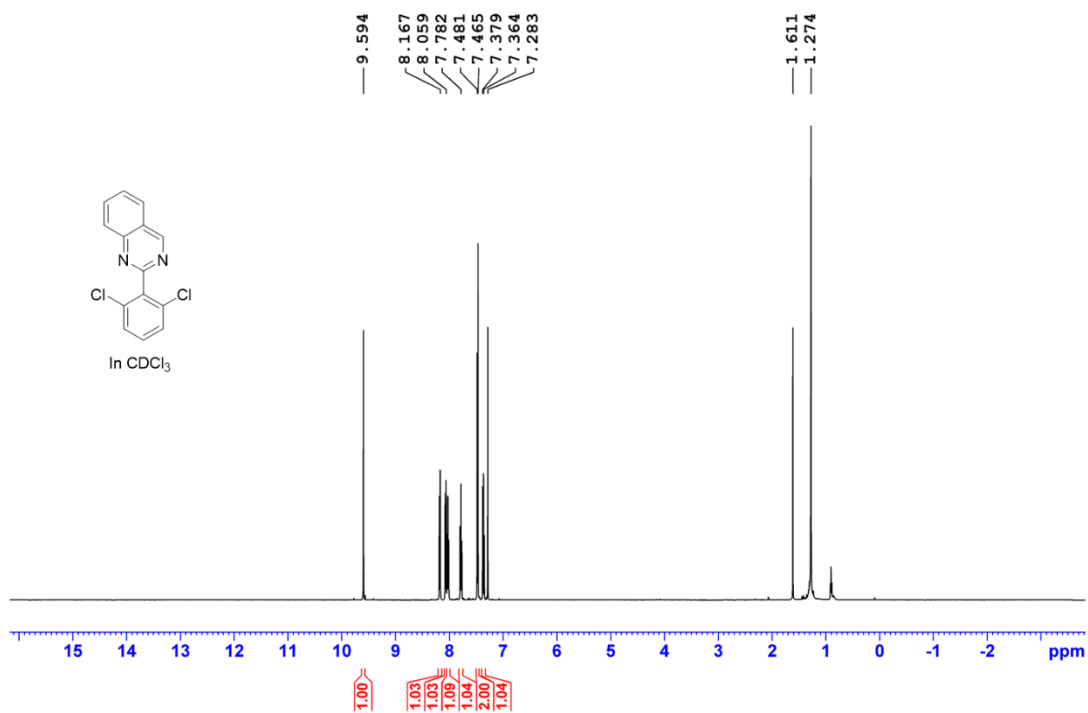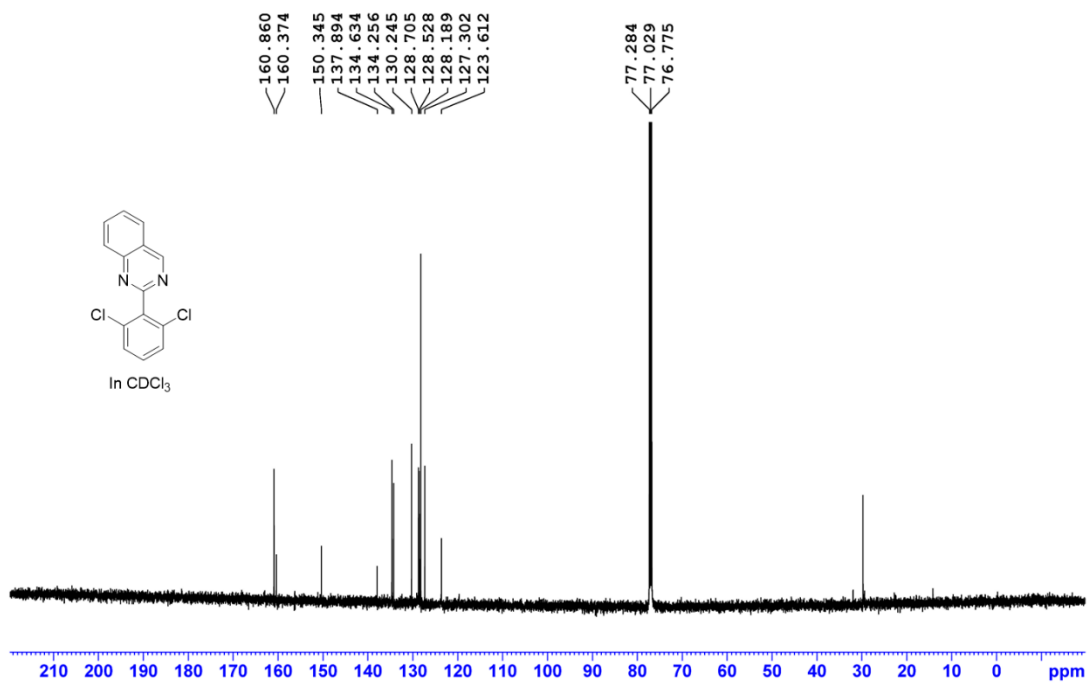

# Supplementary Information

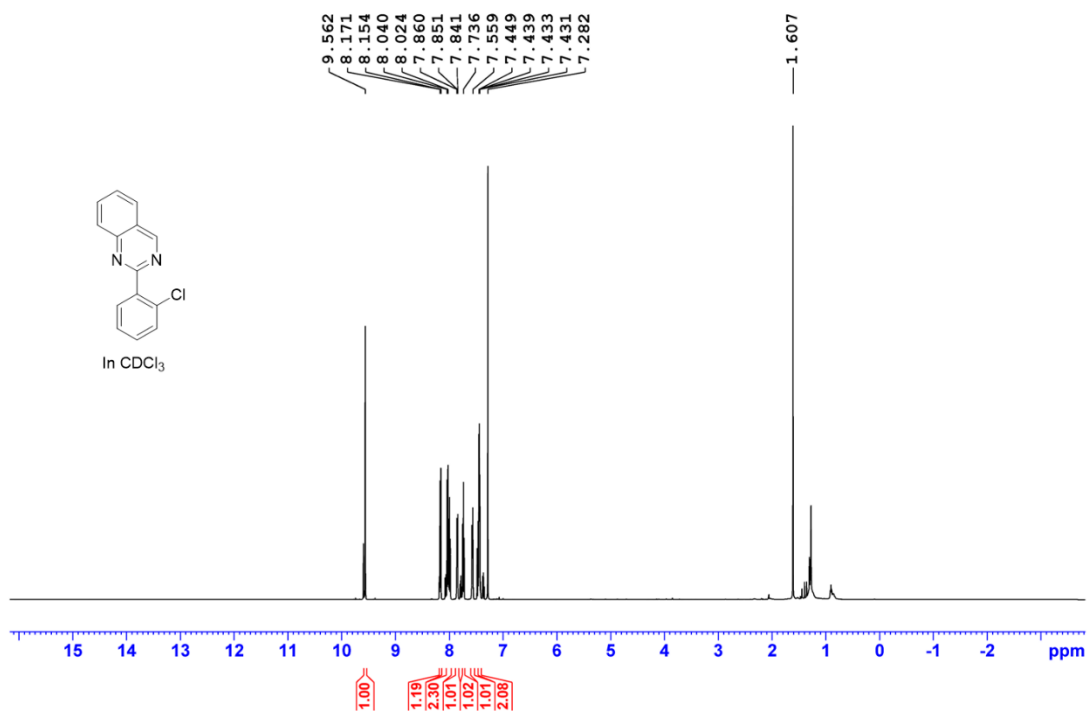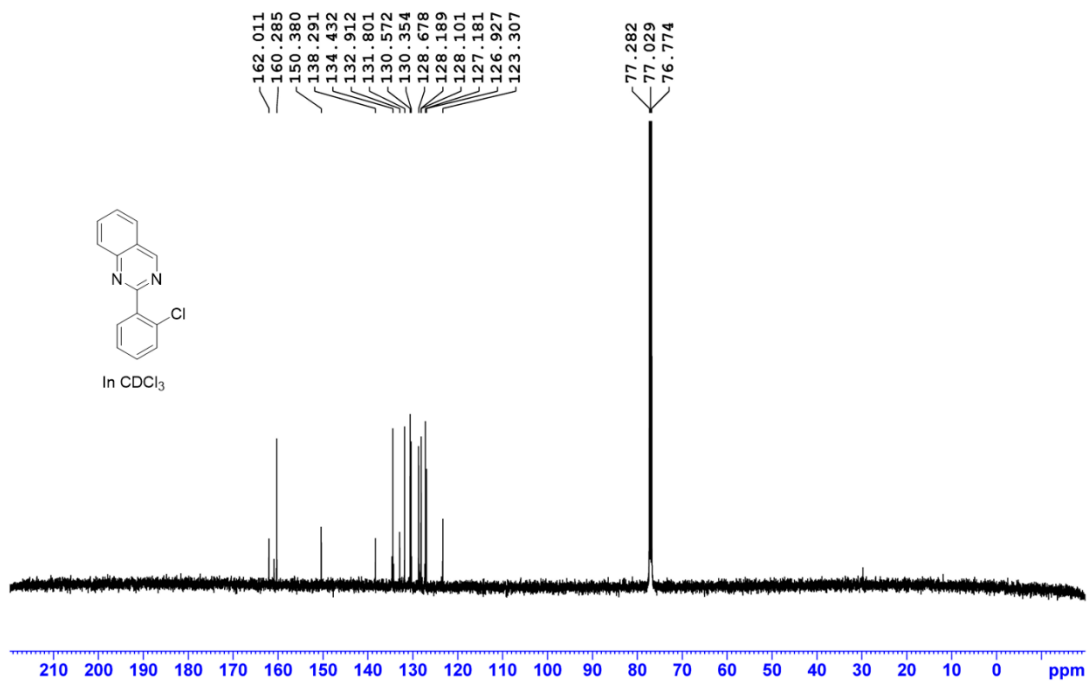

# Supplementary Information

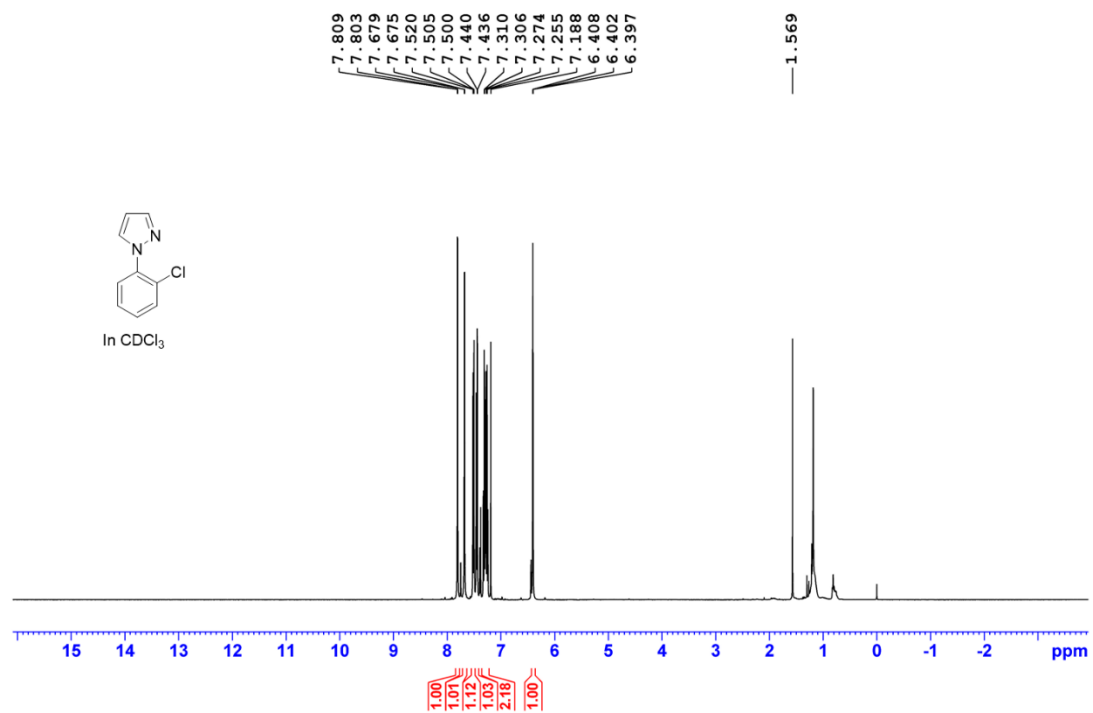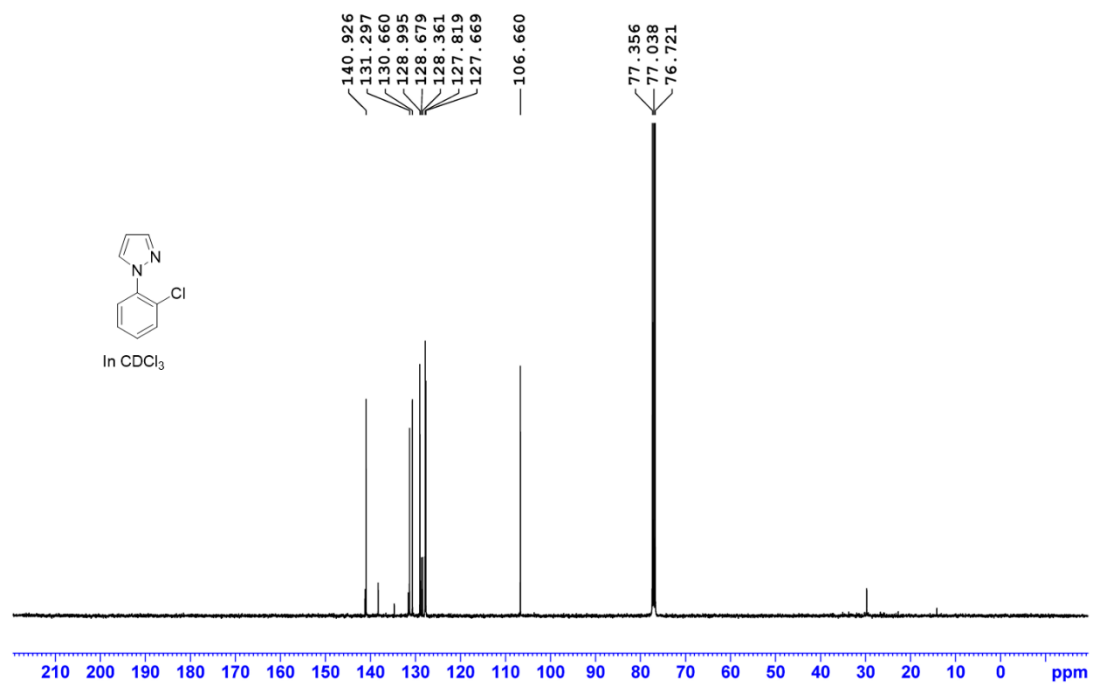

# Supplementary Information

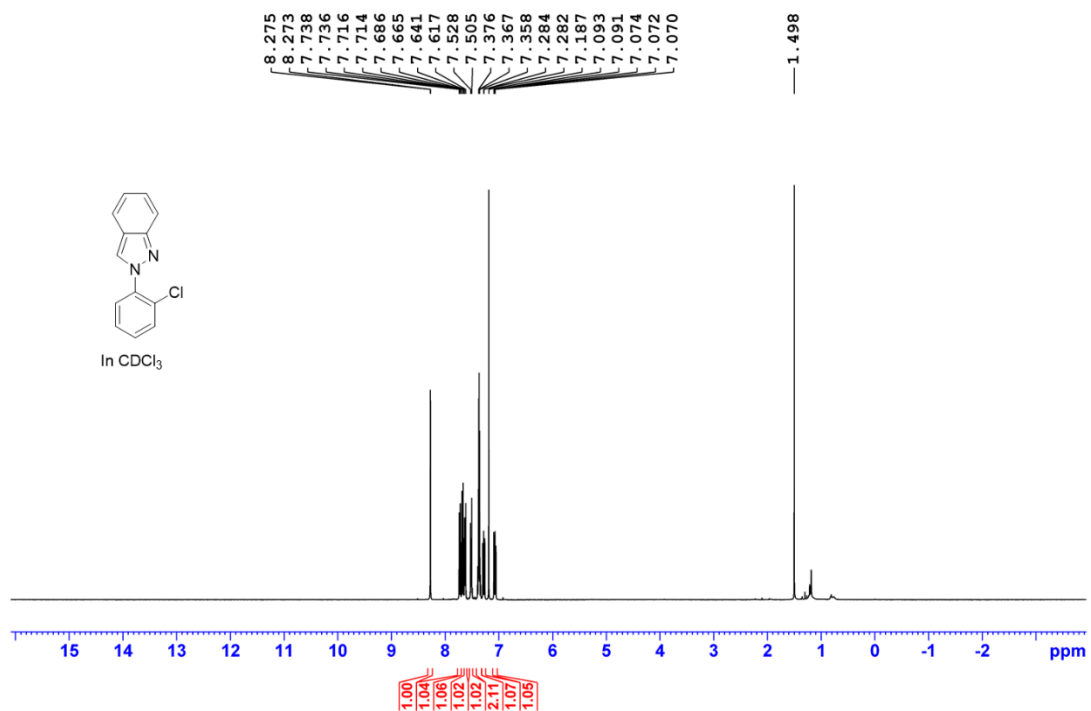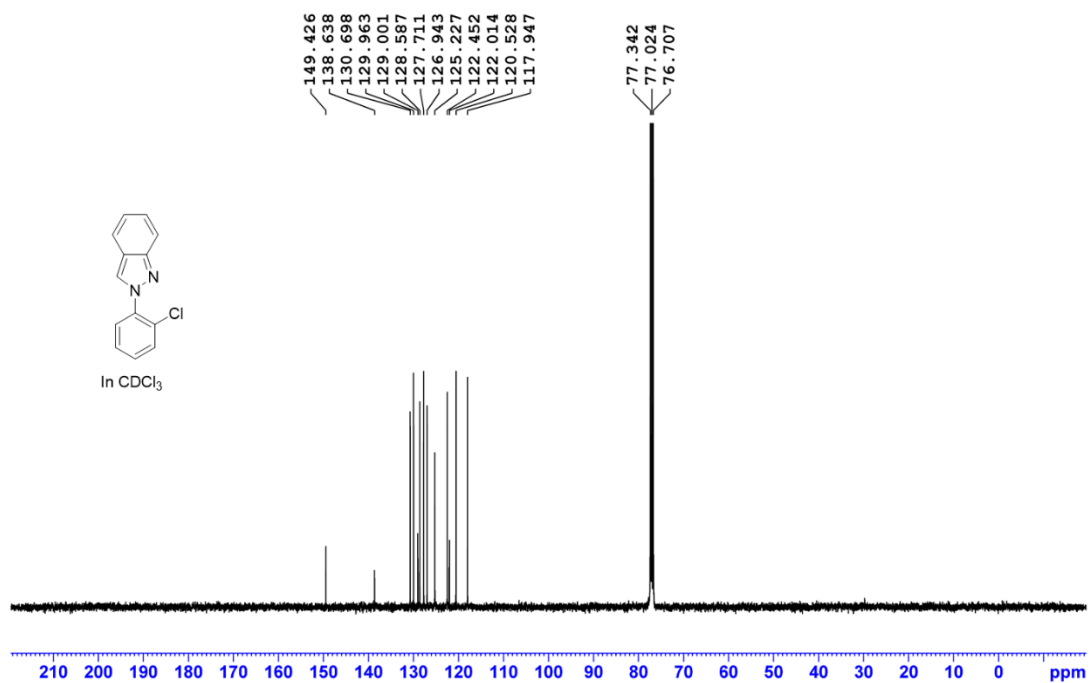

# Supplementary Information

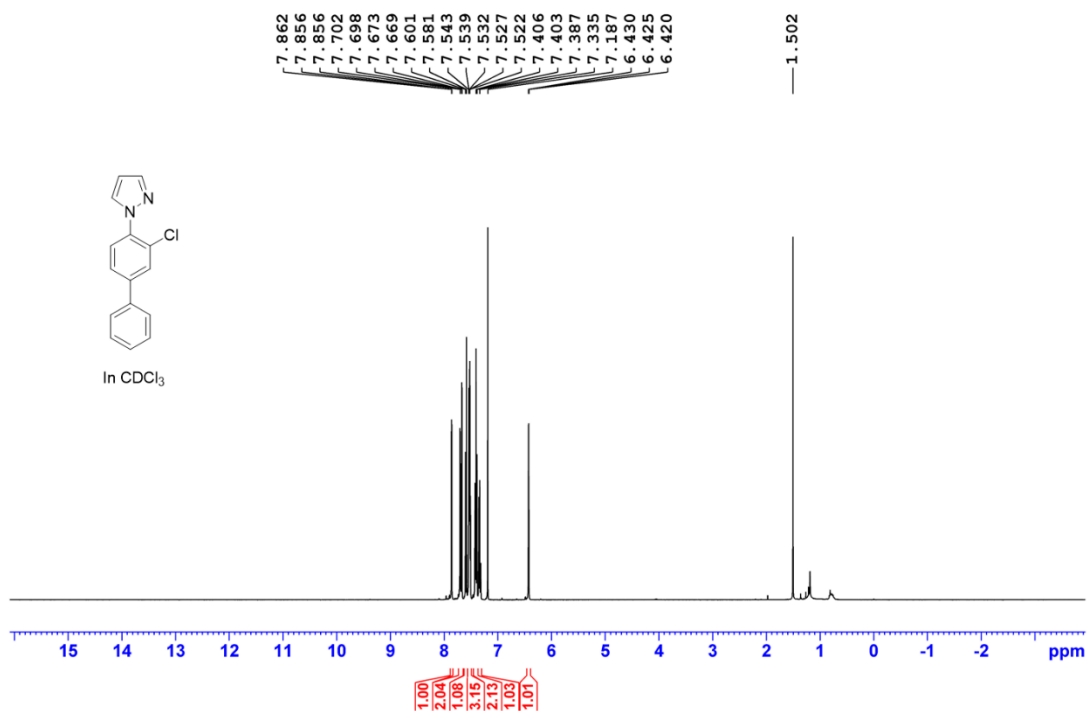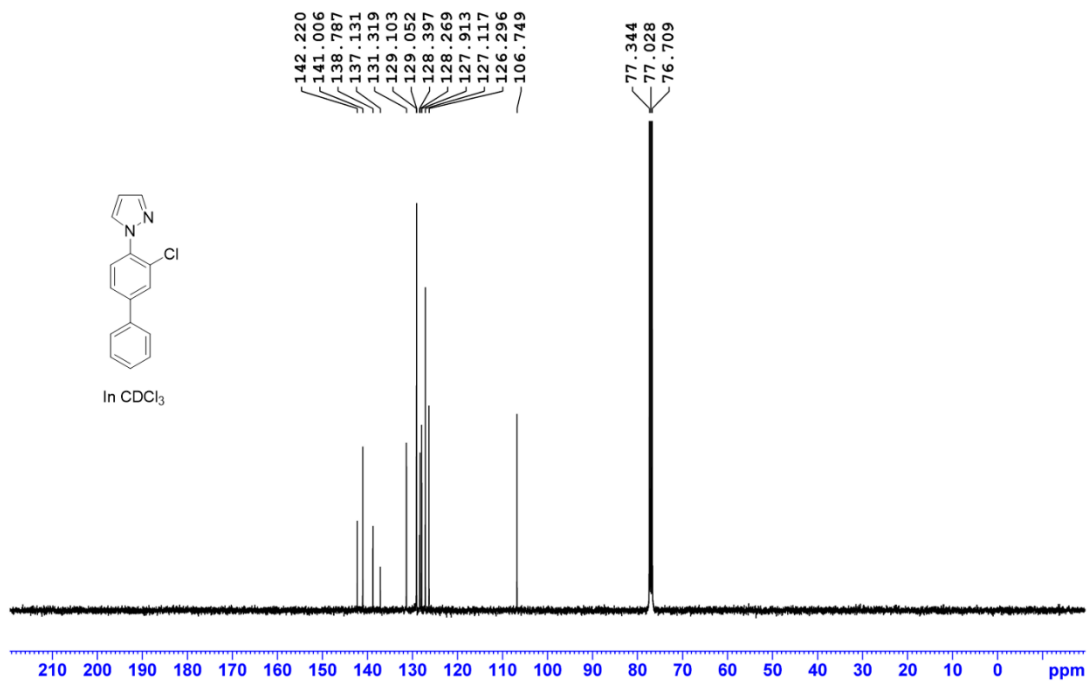

# Supplementary Information

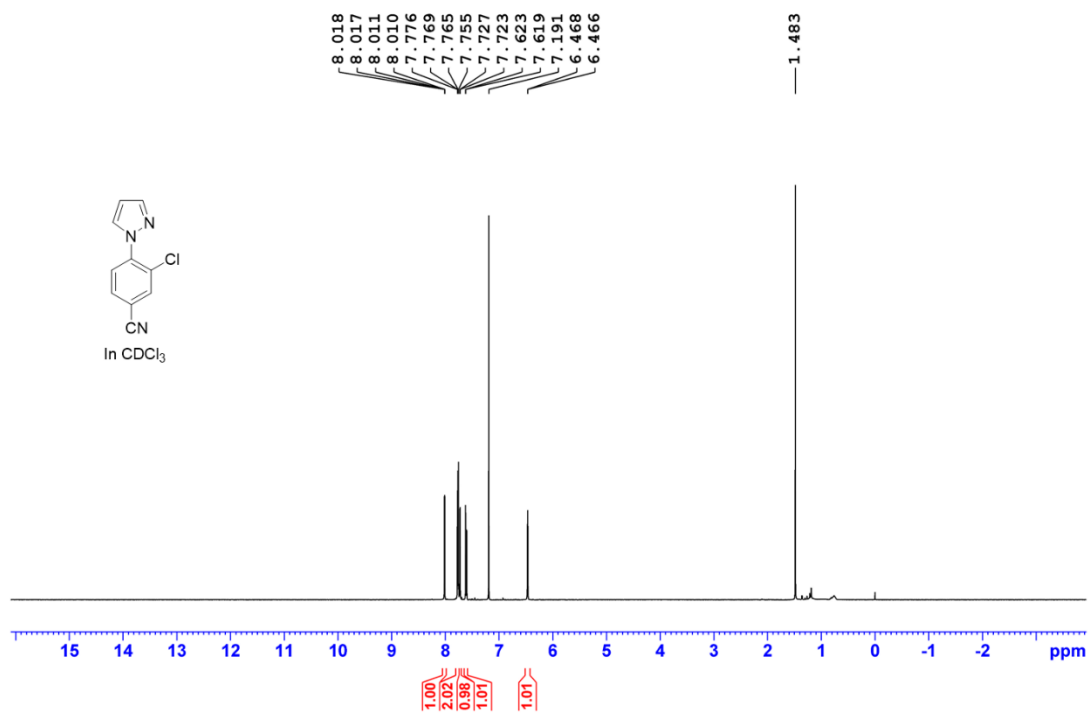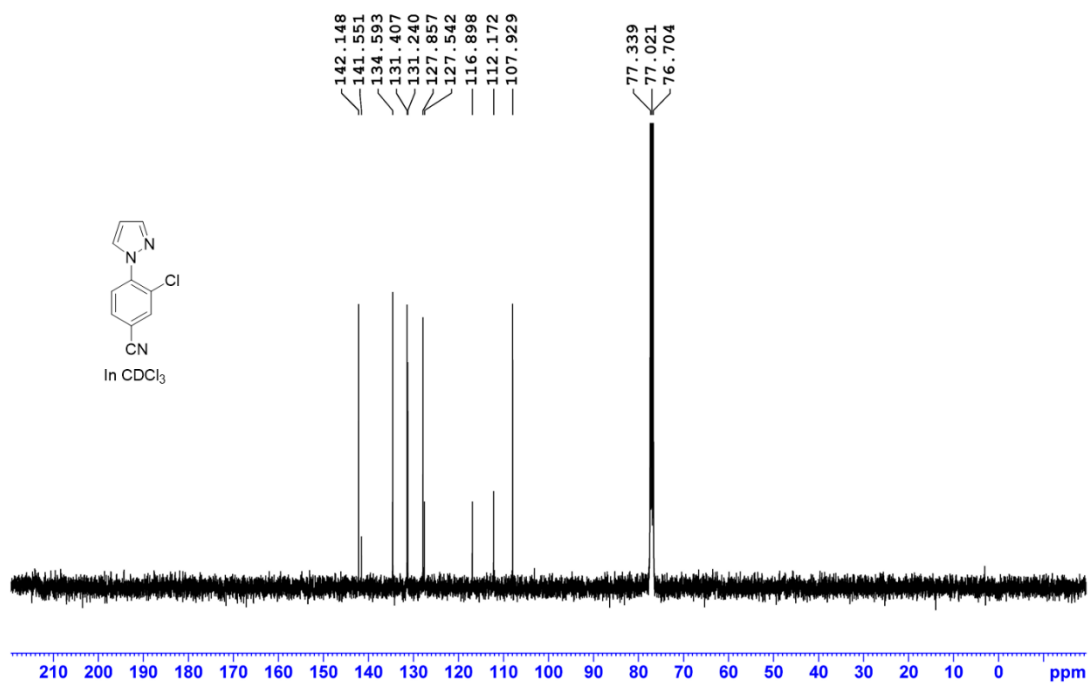

# Supplementary Information

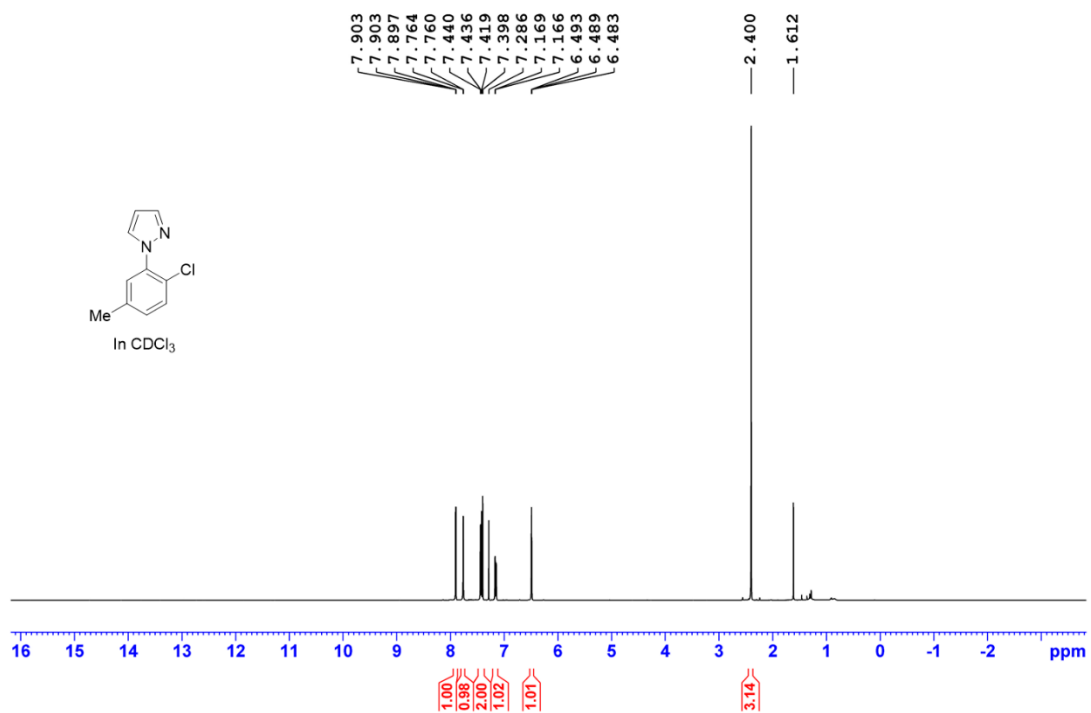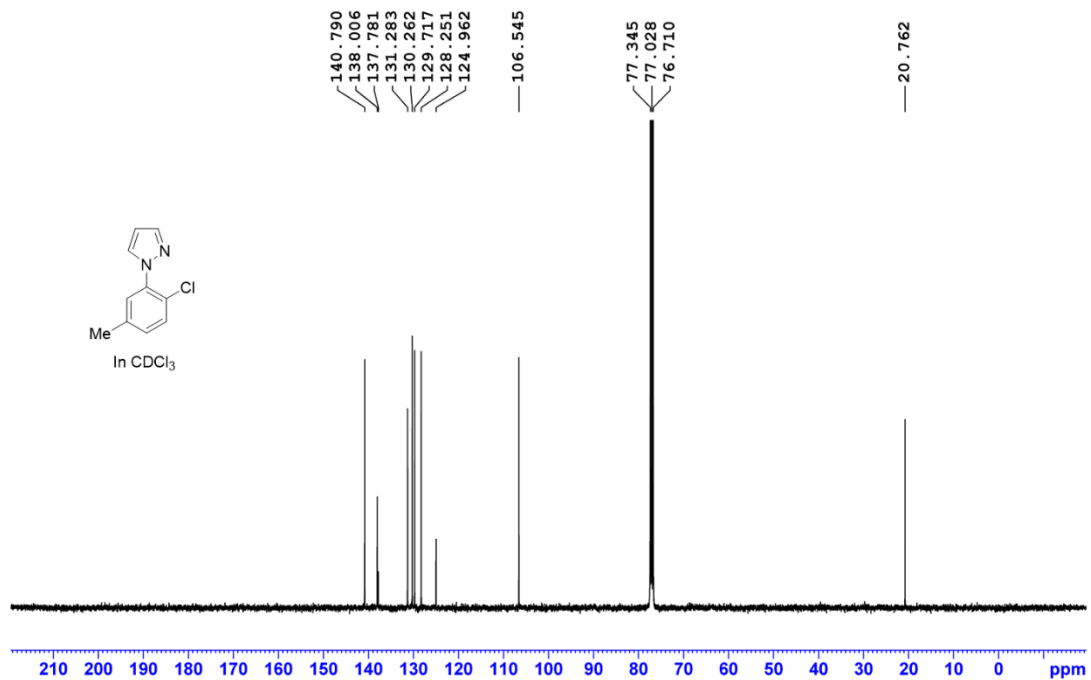

Supplementary Information

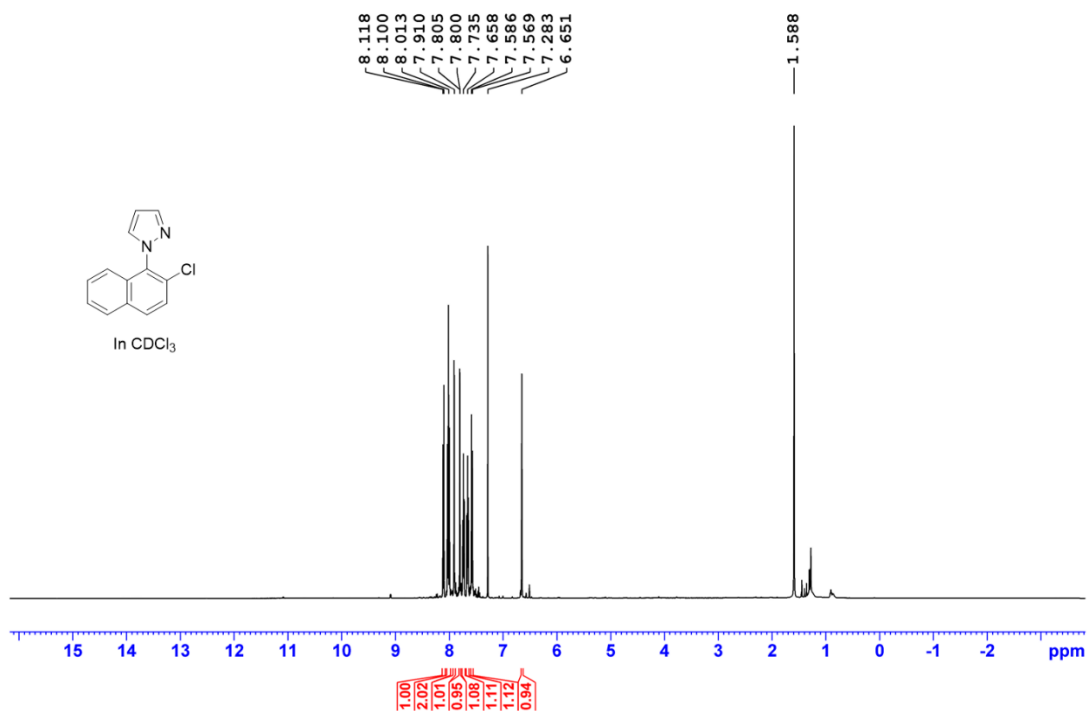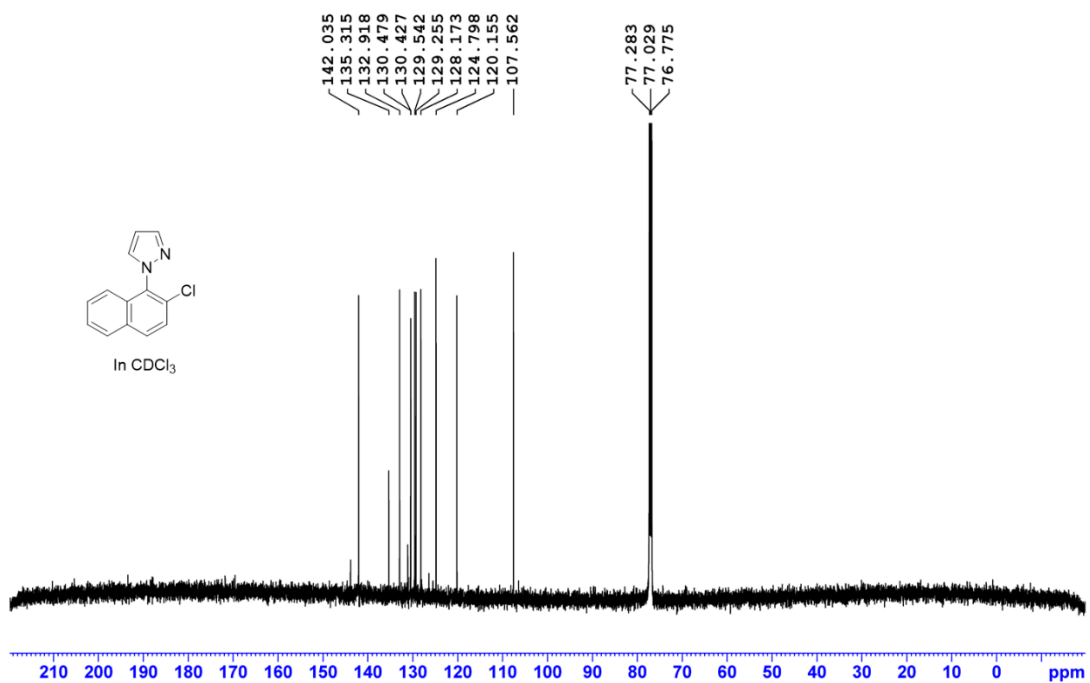

# Supplementary Information

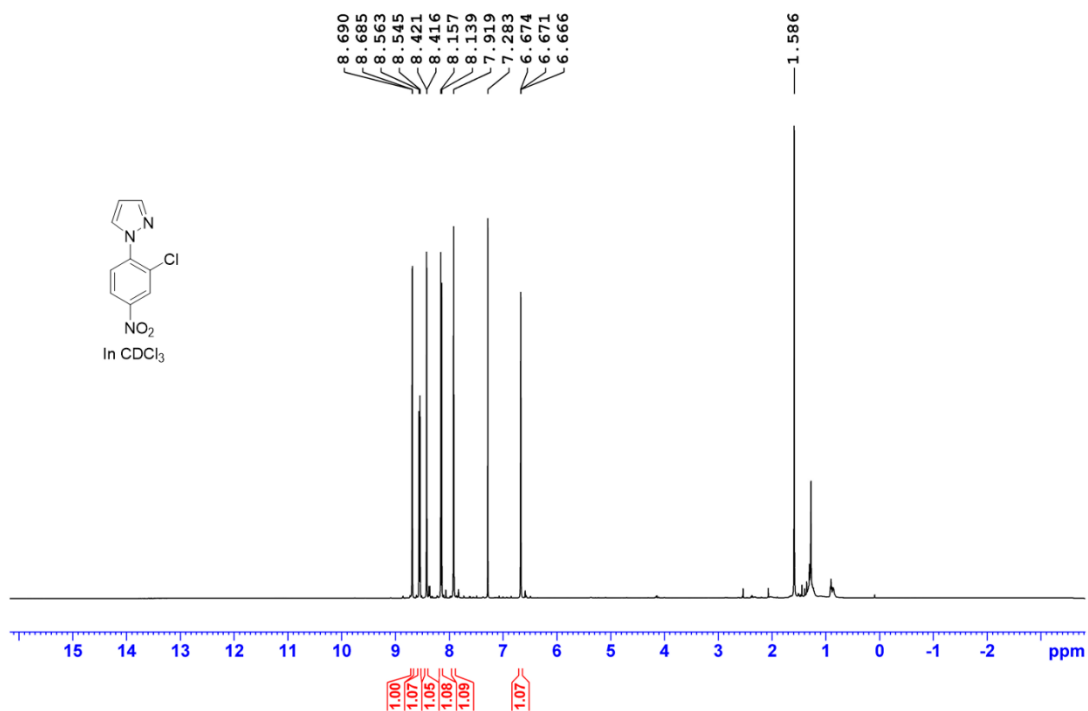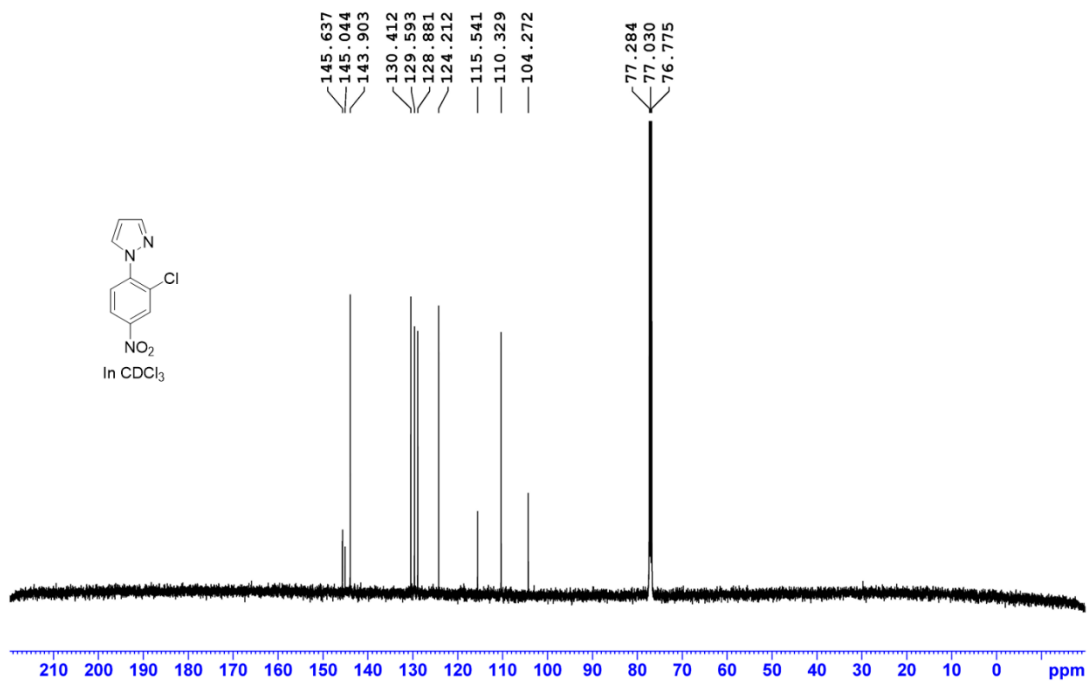

# Supplementary Information

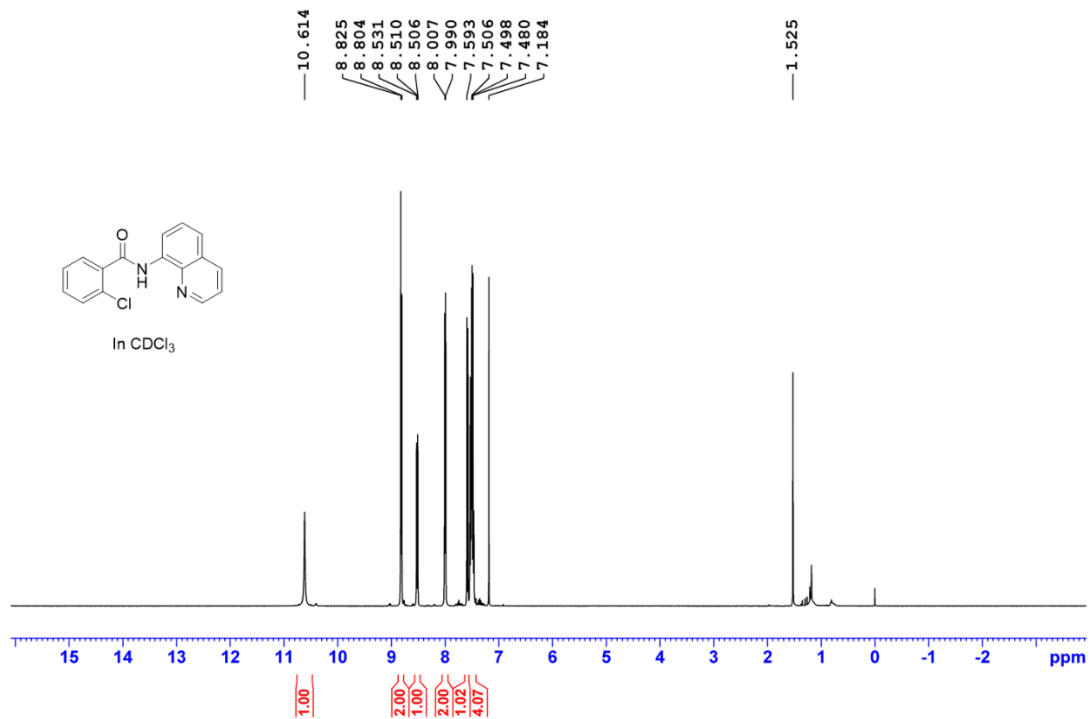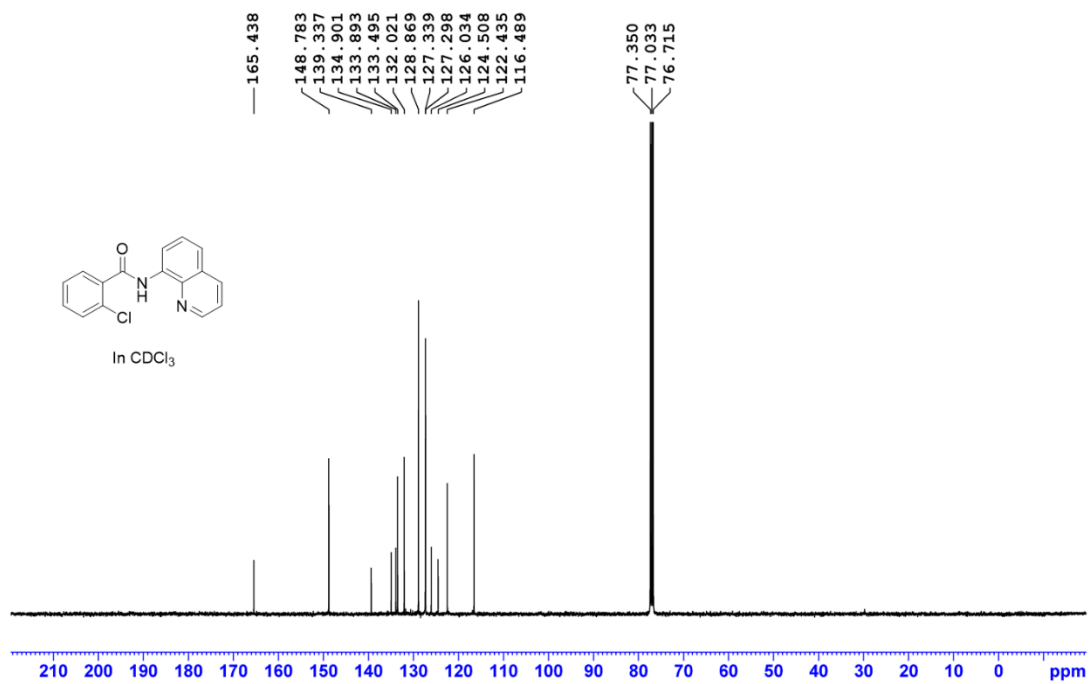

# Supplementary Information

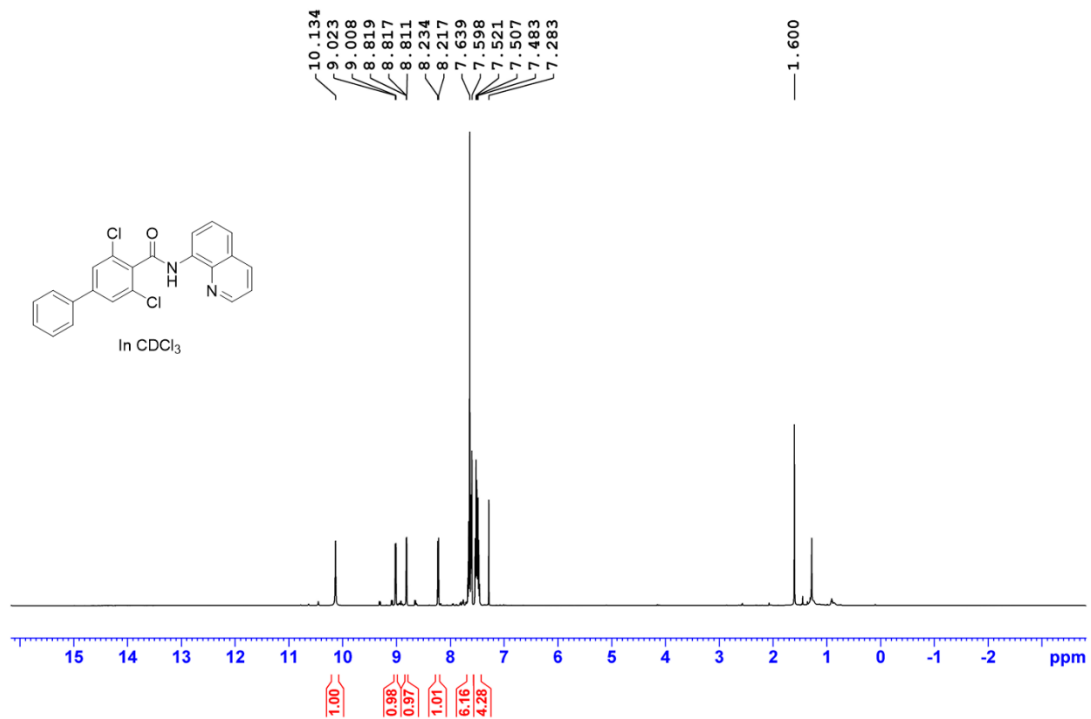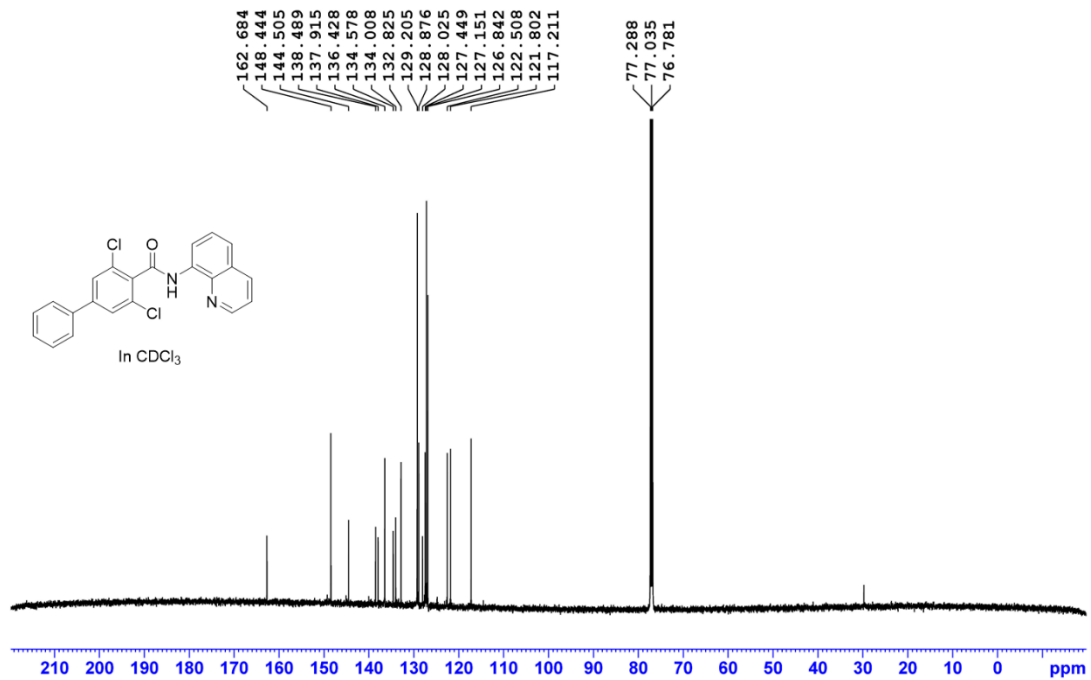

# Supplementary Information

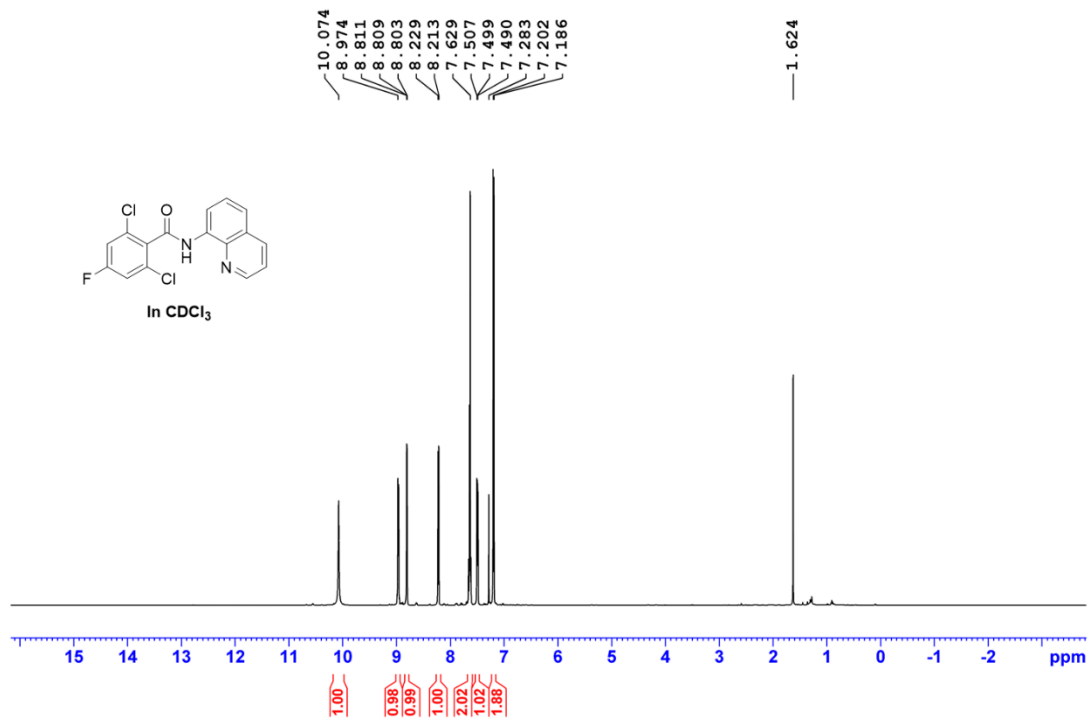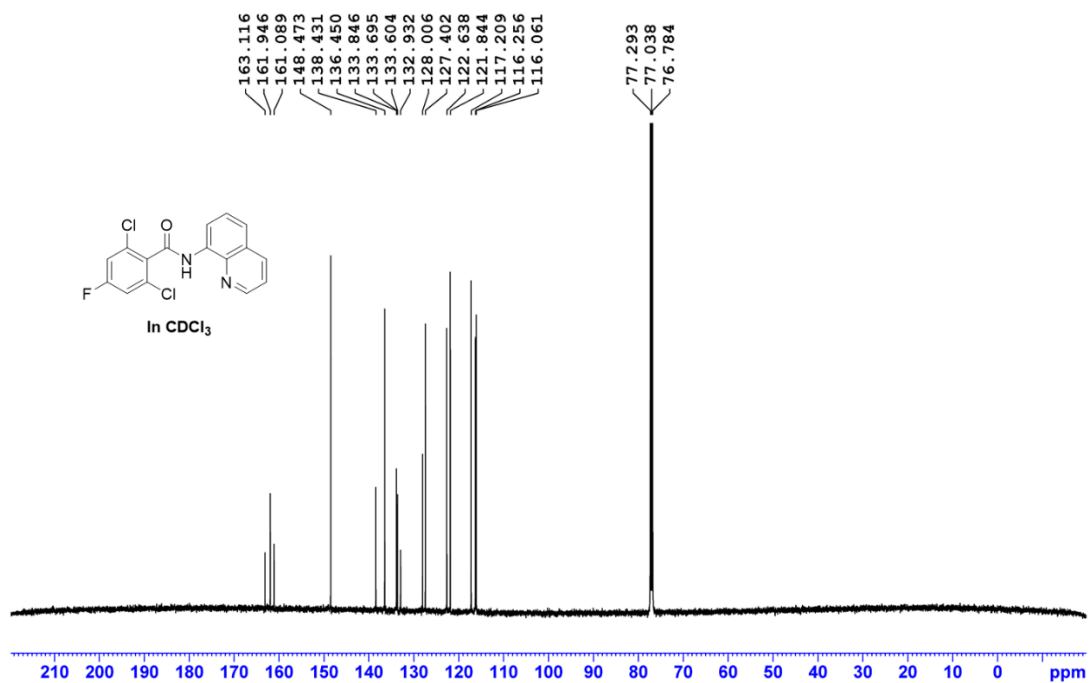

# Supplementary Information

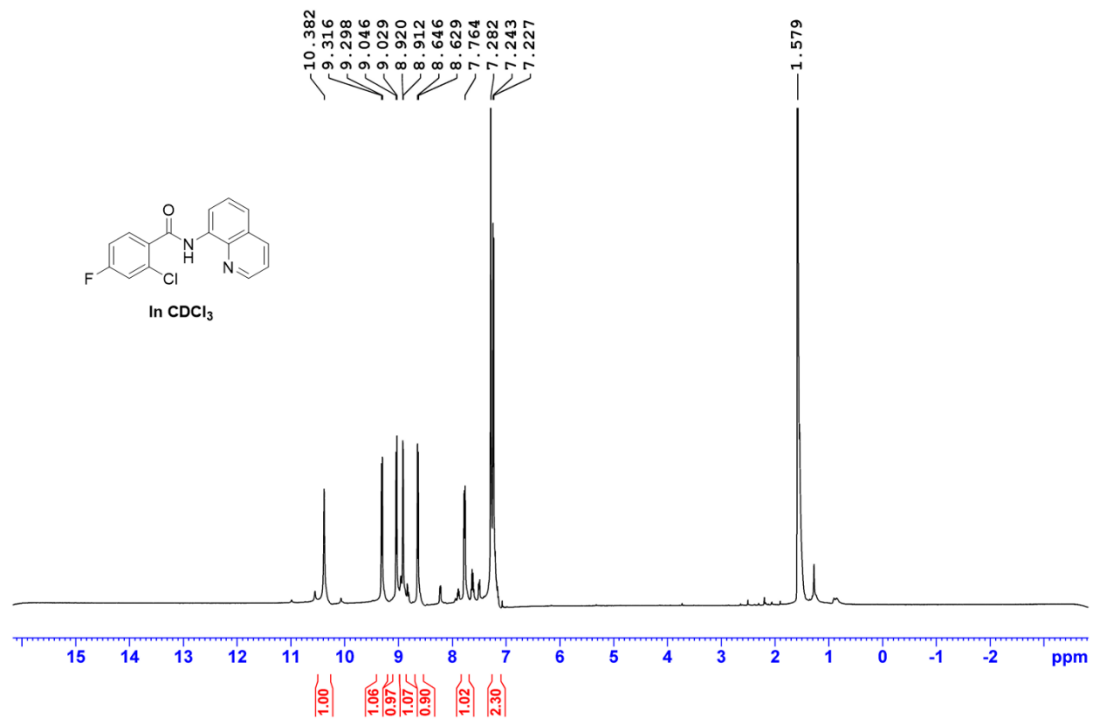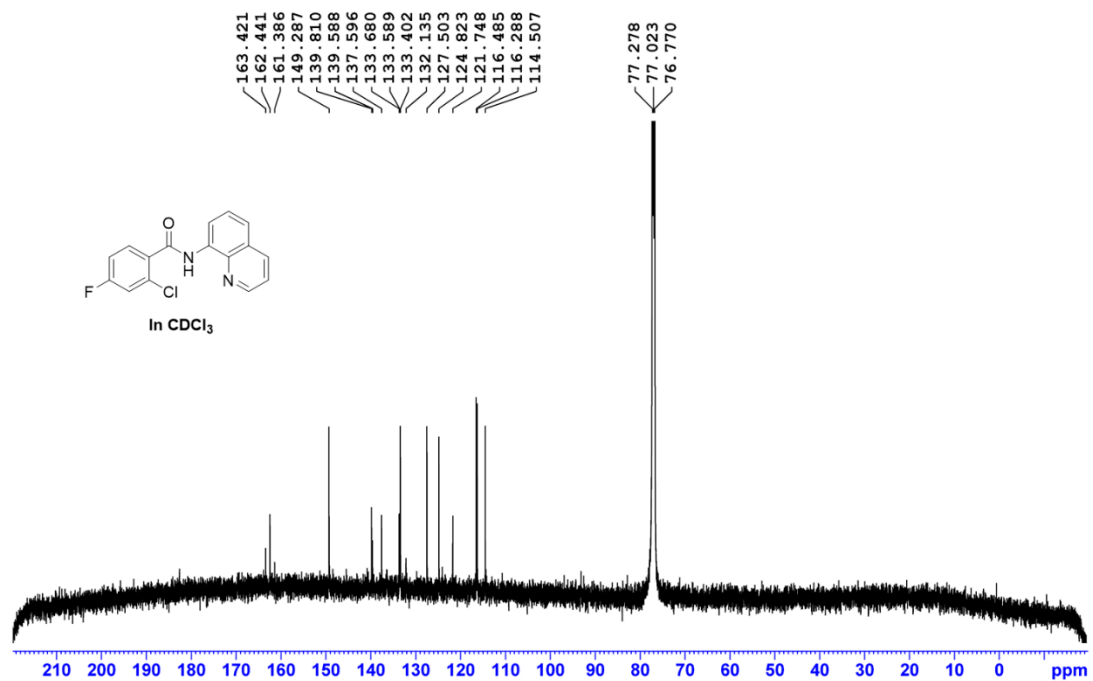

# Supplementary Information

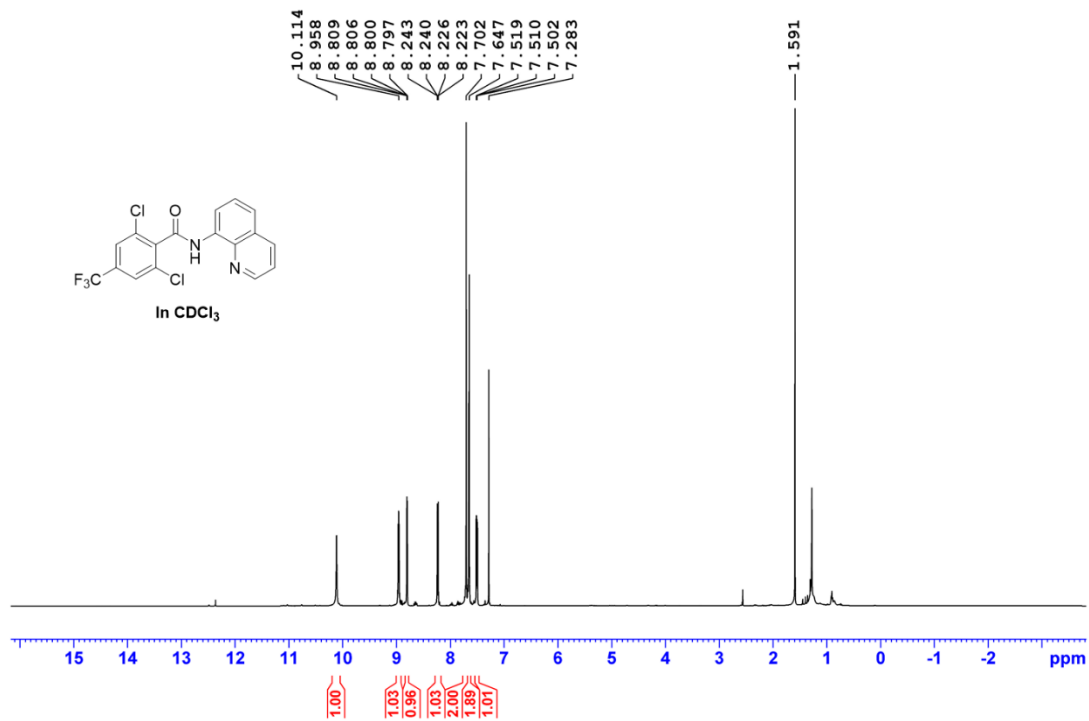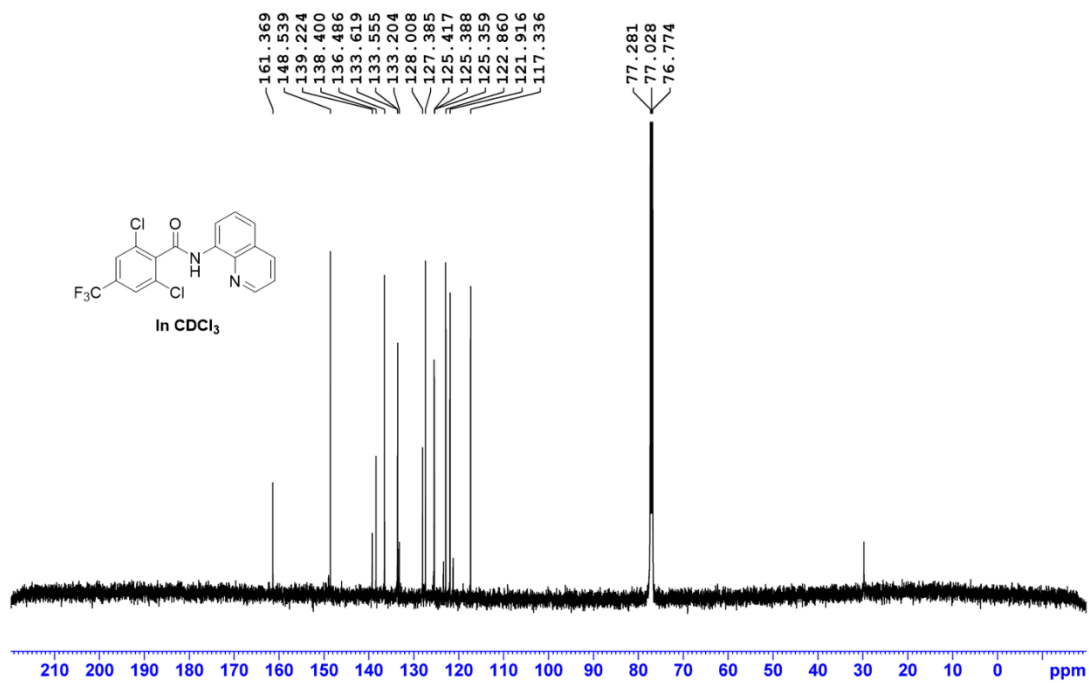

# Supplementary Information

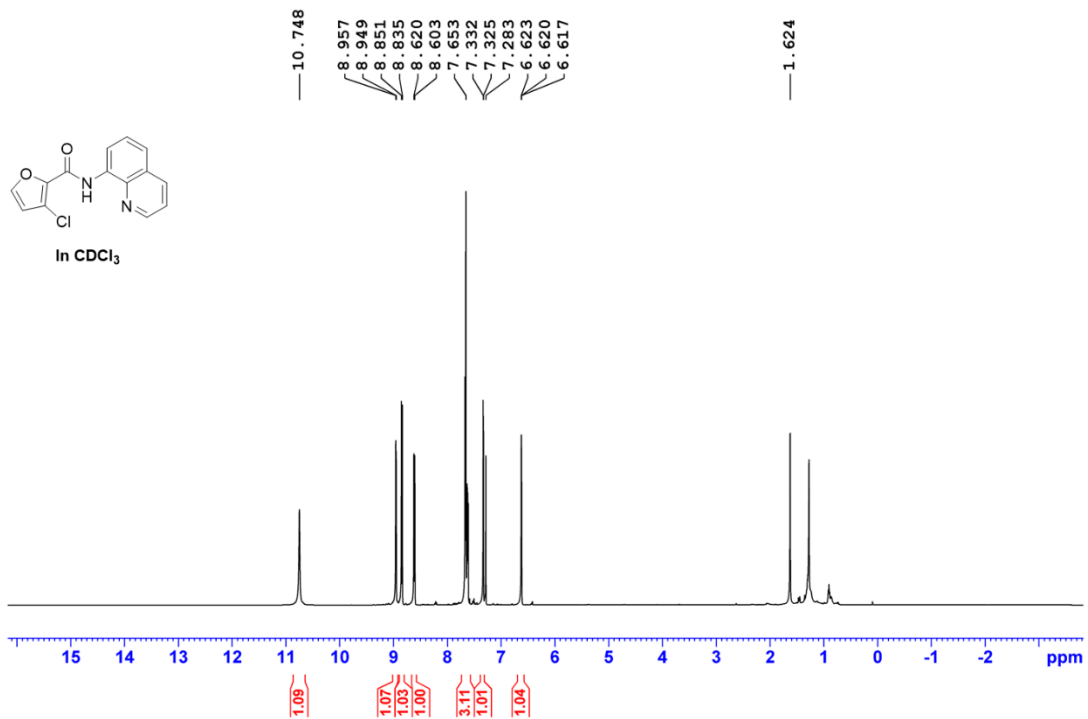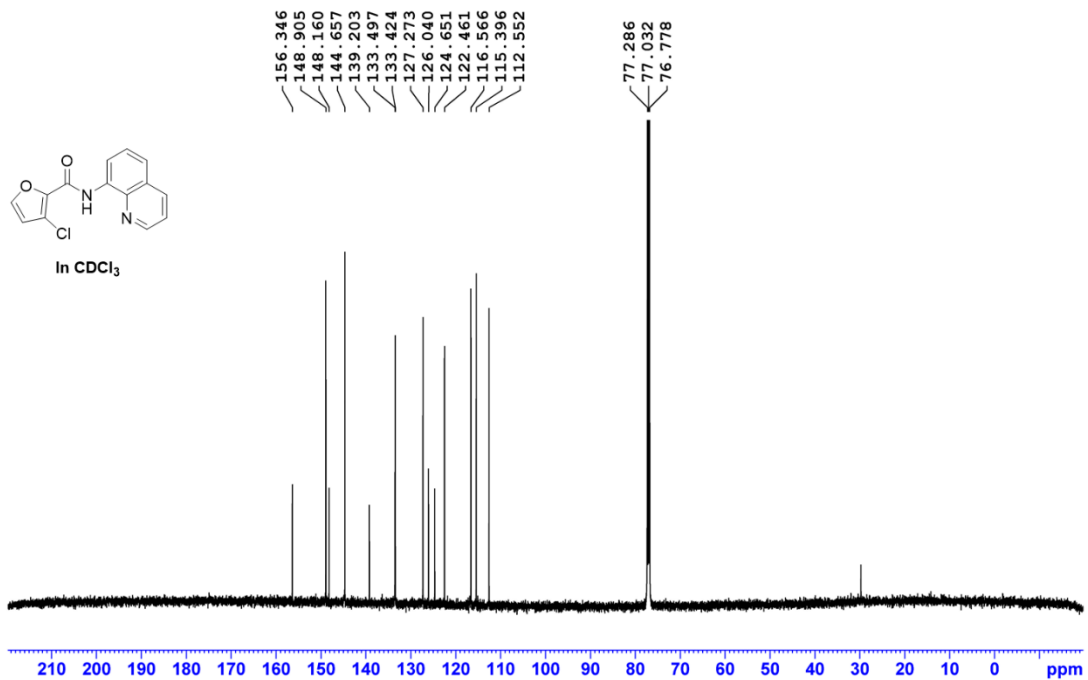

# Supplementary Information

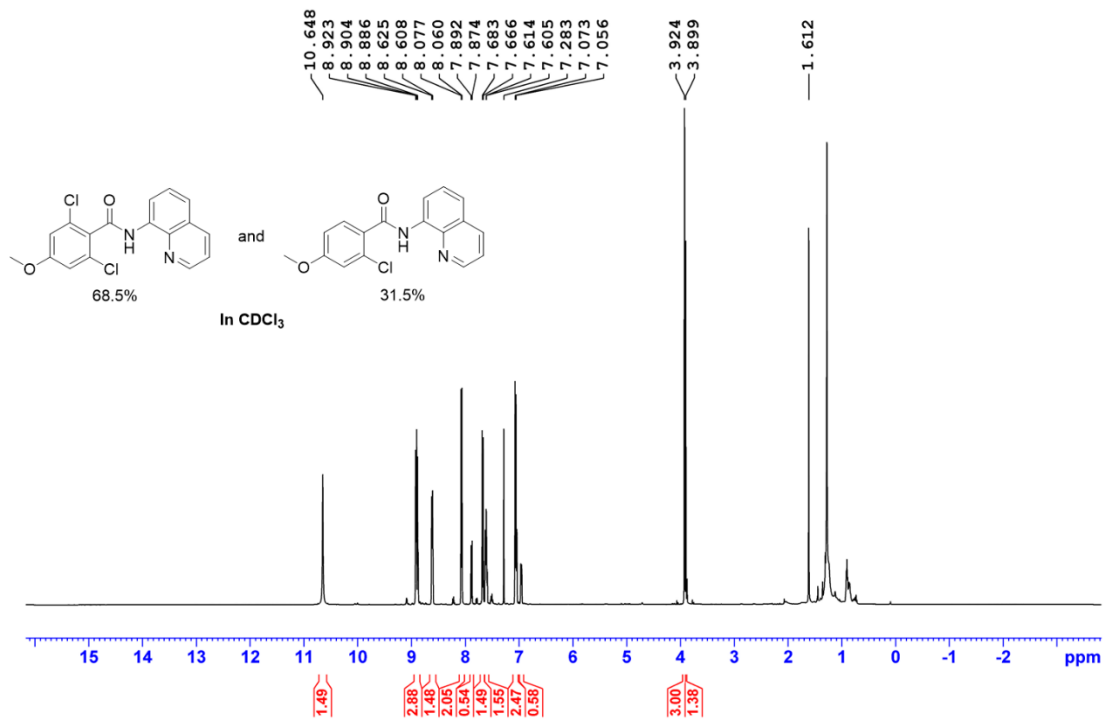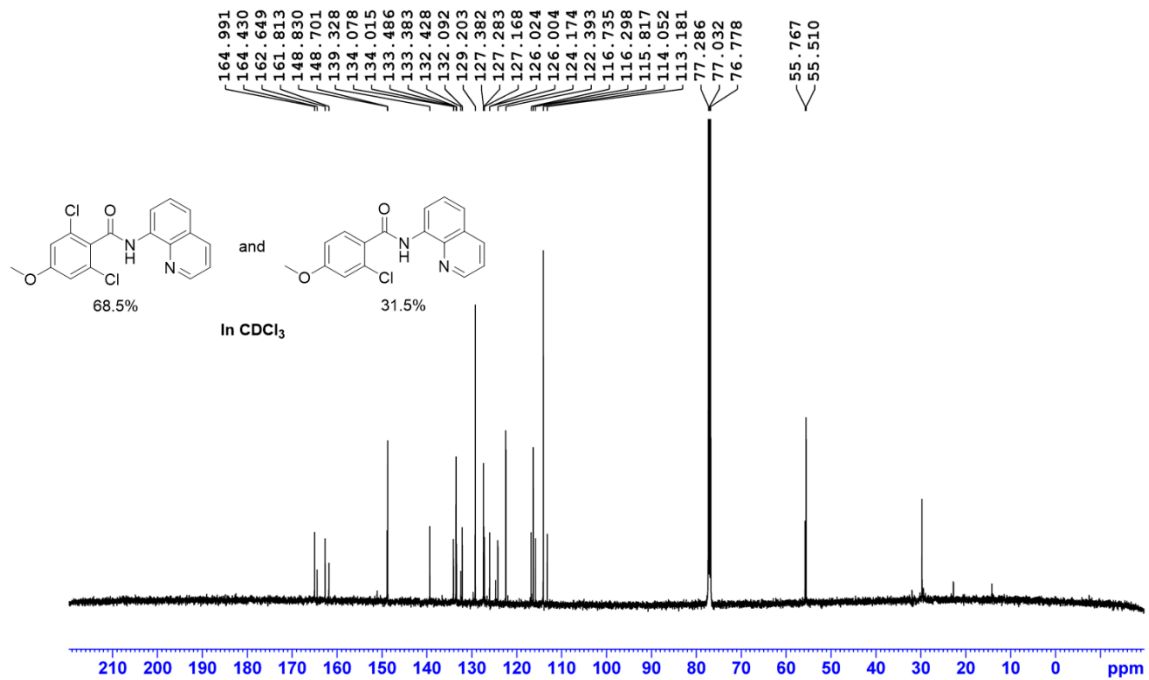

# Supplementary Information

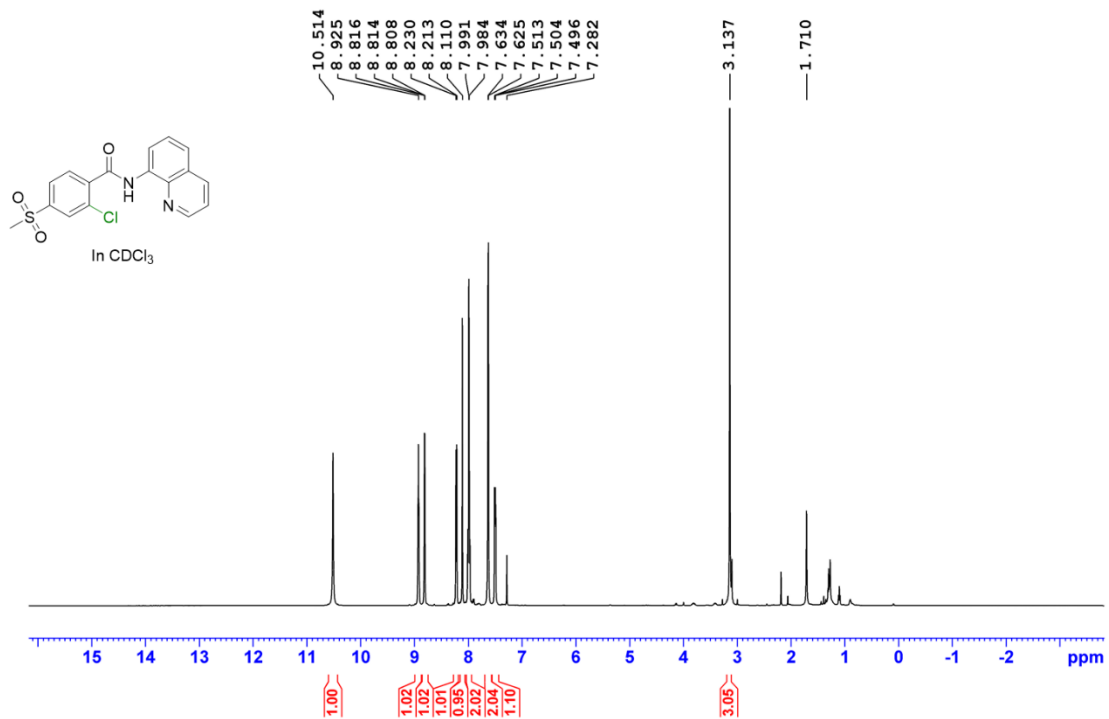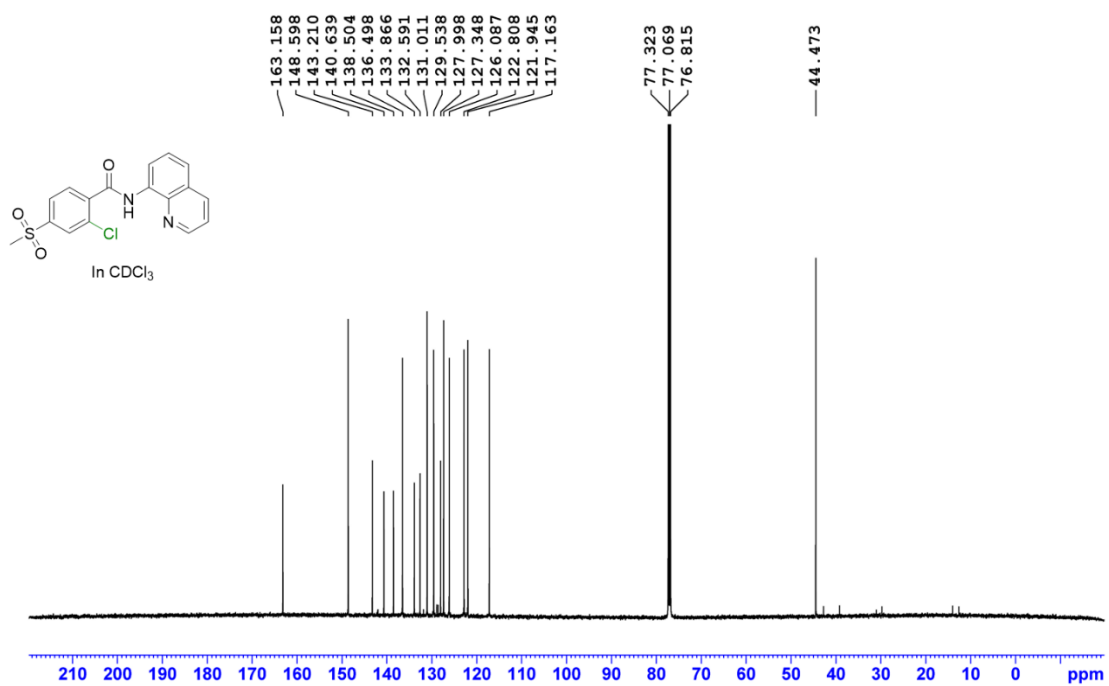

# Supplementary Information

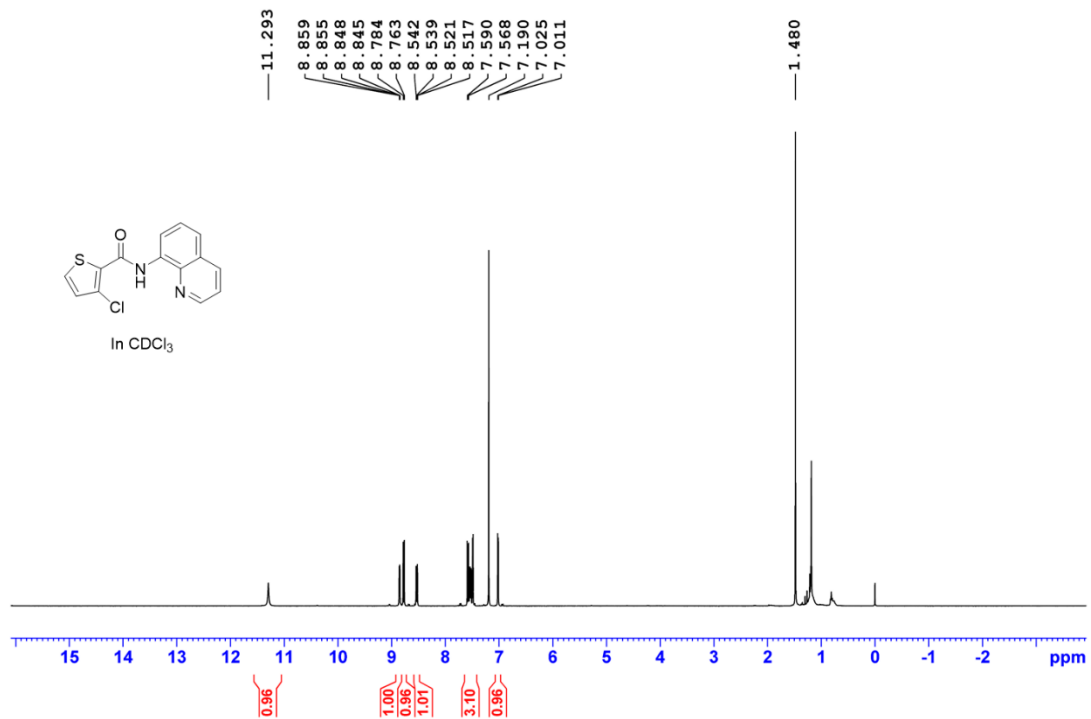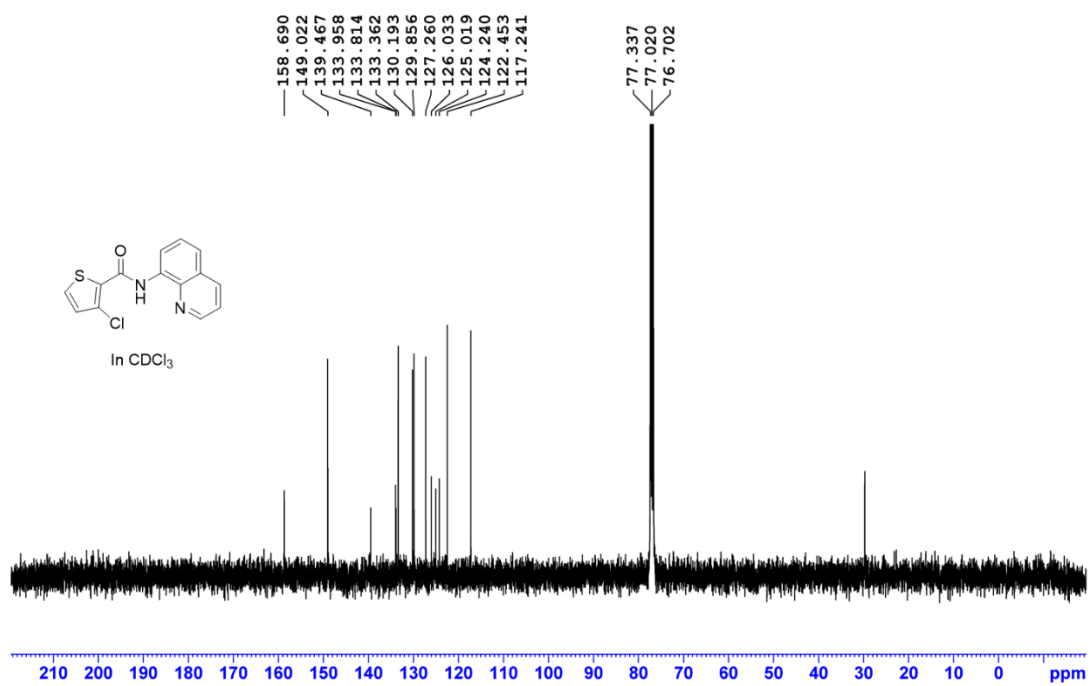

## References

1. Huy, P. H.; Motsch, S.; Kappler, S. M., Formamides as Lewis Base Catalysts in SN Reactions—Efficient Transformation of Alcohols into Chlorides, Amines, and Ethers. *Angew. Chem., Int. Ed.* **2016**, *55*, 10145-10149.
2. Pritchard, J. G.; Vollmer, R. L., The meso and Racemic Forms of 2,4-Pentanediol and Certain of Their Derivatives. *J. Org. Chem.* **1963**, *28*, 1545-1549.
3. Dong, X.-Y.; Zhang, Y.-F.; Ma, C.-L.; Gu, Q.-S.; Wang, F.-L.; Li, Z.-L.; Jiang, S.-P.; Liu, X.-Y., A general asymmetric copper-catalysed Sonogashira C(sp<sup>3</sup>)–C(sp) coupling. *Nat. Chem.* **2019**, *11*, 1158-1166.
4. Littke, A. F.; Fu, G. C., A Convenient and General Method for Pd-Catalyzed Suzuki Cross-Couplings of Aryl Chlorides and Arylboronic Acids. *Angew. Chem., Int. Ed.* **1998**, *37*, 3387-3388.
5. Xu, Z.-L.; Li, H.-X.; Ren, Z.-G.; Du, W.-Y.; Xu, W.-C.; Lang, J.-P., Cu(OAc)<sub>2</sub>·H<sub>2</sub>O-catalyzed N-arylation of nitrogen-containing heterocycles. *Tetrahedron* **2011**, *67*, 5282-5288.
6. Thrimurtulu, N.; Dey, A.; Maiti, D.; Volla, C. M. R., Cobalt-Catalyzed sp<sup>2</sup>-C–H Activation: Intermolecular Heterocyclization with Allenes at Room Temperature. *Angew. Chem., Int. Ed.* **2016**, *55*, 12361-12365.
7. Powers, D. C.; Benitez, D.; Tkatchouk, E.; Goddard, W. A., III; Ritter, T., Bimetallic Reductive Elimination from Dinuclear Pd(III) Complexes. *J. Am. Chem. Soc.* **2010**, *132*, 14092-14103.
8. Yoshioka, T.; Furukawa, K.; Okuwaki, A., Chemical recycling of rigid-PVC by oxygen oxidation in NaOH solutions at elevated temperatures. *Polym. Degrad. Stab.* **2000**, *67*, 285-290.
9. Hashimoto, K.; Suga, S.; Wakayama, Y.; Funazukuri, T., Hydrothermal dechlorination of PVC in the presence of ammonia. *J. Mater. Sci.* **2008**, *43*, 2457-2462.
10. Zhao, T.; Zhou, Q.; He, X.-L.; Wei, S.-D.; Wang, L.; van Kasteren, J. M. N.; Wang, Y.-Z., A highly efficient approach for dehydrochlorinating polyvinyl chloride: catalysis by 1-butyl-3-methylimidazolium chloride. *Green Chem.* **2010**, *12*, 1062-1065.
11. Yoshihara, M.; Grause, G.; Kameda, T.; Yoshioka, T., Upgrading of poly(vinyl chloride) by chemical modifications using sodium sulfide. *J. Mater. Cycles Waste Manag.* **2010**, *12*, 264-270.
12. Kameda, T.; Wachi, S.; Grause, G.; Mizoguchi, T.; Yoshioka, T., Dehydrochlorination of poly(vinyl chloride) with Ca(OH)<sub>2</sub> in ethylene glycol and the effect of ball milling. *J. Polym. Res.* **2011**, *18*, 1687-1691.
13. Glas, D.; Hulsbosch, J.; Dubois, P.; Binnemans, K.; De Vos, D. E., End-of-Life Treatment of Poly(Vinyl Chloride) and Chlorinated Polyethylene by Dehydrochlorination in Ionic Liquids. *ChemSusChem* **2014**, *7*, 610-617.
14. Oster, K.; Tedstone, A.; Greer, A. J.; Budgen, N.; Garforth, A.; Hardacre, C., Dehydrochlorination of PVC in multi-layered blisterpacks using ionic liquids. *Green Chem.* **2020**, *22*, 5132-5142.
15. Assefa, M. K.; Fieser, M. E., Divergent silylium catalysis enables facile poly(vinyl chloride) upcycling to poly(ethylene-co-styrene) derivatives. *J. Mater. Chem. A* **2023**, *11*, 2128-2132.
16. O'Rourke, G.; Hennebel, T.; Stalpaert, M.; Skorynina, A.; Bugaev, A.; Janssens, K.; Van Emelen, L.; Lemmens, V.; De Oliveira Silva, R.; Colemonts, C.; Gabriels, P.; Sakellariou, D.; De Vos, D., Catalytic tandem dehydrochlorination–hydrogenation of PVC towards valorisation of chlorinated plastic waste. *Chem. Sci.* **2023**, *14*, 4401-4412.
17. Zhou, Q.; Lan, W.; Du, A.; Wang, Y.; Yang, J.; Wu, Y.; Yang, K.; Wang, X., Lanthania promoted MgO: Simultaneous highly efficient catalytic degradation and dehydrochlorination of polypropylene/polyvinyl chloride. *Appl. Catal. B: Environ.* **2008**, *80*, 141-146.
18. Bae, S. Y.; Jeon, S.; Lee, Y. H.; Lee, D. H.; Kye, H.; Bae, J. W., Dehydrochlorination of polyvinylchloride using Al-modified graphitic-C<sub>3</sub>N<sub>4</sub>. *RSC Advances* **2016**, *6*, 20728-20733.
19. Chen, Y.; Zhang, S.; Han, X.; Zhang, X.; Yi, M.; Yang, S.; Yu, D.; Liu, W., Catalytic Dechlorination and Charring Reaction of Polyvinyl Chloride by CuAl Layered Double Hydroxide. *Energy Fuels* **2018**, *32*, 2407-2413.

20. Gao, Z.; Lu, L.; Shi, C.; Qian, X.; Wang, X.; Zhang, G.; Zhou, M.; Pan, Y., The study of ZnAl and ZnFe layered double hydroxide on the catalytic dechlorination and fire safety of polyvinyl chloride. *J. Therm. Anal. Calorim.* **2020**, *140*, 115-123.
21. Jin, D.; Khanal, S.; Xu, S., Effects of ZnAl layered double hydroxide and benzimidazole derivative on the dechlorination of poly(vinyl chloride). *Appl. Clay Sci.* **2021**, *208*, 106114.
22. Kots, P. A.; Vance, B. C.; Quinn, C. M.; Wang, C.; Vlachos, D. G., A two-stage strategy for upcycling chlorine-contaminated plastic waste. *Nature Sustainability* **2023**, *6*, 1258-1267.
23. Pearson, D. M.; Conley, N. R.; Waymouth, R. M., Palladium-Catalyzed Carbonylation of Diols to Cyclic Carbonates. *Adv. Synth. Catal.* **2011**, *353*, 3007-3013.
24. Eytel, L. M.; Fargher, H. A.; Haley, M. M.; Johnson, D. W., The road to aryl CH $\cdots$ anion binding was paved with good intentions: fundamental studies, host design, and historical perspectives in CH hydrogen bonding. *Chem. Commun.* **2019**, *55*, 5195-5206.
25. Wang, L.; Zhang, R.-z.; Deng, R.; Luo, Y.-h., Oxygen-Induced Enhancement in Low-Temperature Dechlorination of PVC: An Experimental and DFT Study on the Oxidative Pyrolysis Process. *ACS Sustain. Chem. Eng.* **2021**, *9*, 2835-2843.
26. Zhang, R.-z.; Wang, L.-z.; Deng, R.-q.; Luo, Y.-h., Inhibition on Chloroaromatics during thermal conversion processes of Municipal Solid Waste by oxygen-induced low-temperature pre-dechlorination and hydrogen-assisted in-situ Cl capture. *Fuel Process. Technol.* **2022**, *237*, 107445.
27. Song, S.; Li, X.; Wei, J.; Wang, W.; Zhang, Y.; Ai, L.; Zhu, Y.; Shi, X.; Zhang, X.; Jiao, N., DMSO-catalysed late-stage chlorination of (hetero)arenes. *Nat. Catal.* **2020**, *3*, 107-115.
28. Nizovtsev, A. S.; Bogdanchikov, G. A.; Baklanov, A. V., The computational study of the "inversion substitution" reactions  $CX_3Br + O_2 \rightarrow CX_3O_2 + Br$  ( $X = H, F$ ). *Combust. Flame* **2010**, *157*, 1382-1389.
29. Richard, J. P.; Jencks, W. P., Concerted bimolecular substitution reactions of 1-phenylethyl derivatives. *J. Am. Chem. Soc.* **1984**, *106*, 1383-1396.
30. Hasan, T.; Sims, L. B.; Fry, A., Heavy atom isotope effect studies of elimination reaction mechanisms. 1. A kinetic and carbon-14 kinetic isotope effect study of the base-promoted dehydrochlorination of substituted 1-phenylethyl-2- $^{14}C$  chlorides. *J. Am. Chem. Soc.* **1983**, *105*, 3967-3975.
31. Wang, Z.; Bachman, S.; Dudnik, A. S.; Fu, G. C., Nickel-Catalyzed Enantioconvergent Borylation of Racemic Secondary Benzylic Electrophiles. *Angew. Chem., Int. Ed.* **2018**, *57*, 14529-14532.
32. Mueller, J. A.; Goller, C. P.; Sigman, M. S., Elucidating the Significance of  $\beta$ -Hydride Elimination and the Dynamic Role of Acid/Base Chemistry in a Palladium-Catalyzed Aerobic Oxidation of Alcohols. *J. Am. Chem. Soc.* **2004**, *126*, 9724-9734.
33. Schultz, M. J.; Park, C. C.; Sigman, M. S., A convenient palladium-catalyzed aerobic oxidation of alcohols at room temperature. *Chem. Commun.* **2002**, 3034-3035.
34. Schultz, M. J.; Adler, R. S.; Zierkiewicz, W.; Privalov, T.; Sigman, M. S., Using Mechanistic and Computational Studies To Explain Ligand Effects in the Palladium-Catalyzed Aerobic Oxidation of Alcohols. *J. Am. Chem. Soc.* **2005**, *127*, 8499-8507.
35. Wang, D.; Weinstein, A. B.; White, P. B.; Stahl, S. S., Ligand-Promoted Palladium-Catalyzed Aerobic Oxidation Reactions. *Chem. Rev.* **2018**, *118*, 2636-2679.
36. Liu, M.; Zhang, Z.; Song, J.; Liu, S.; Liu, H.; Han, B., Nitrogen Dioxide Catalyzed Aerobic Oxidative Cleavage of C(OH)-C Bonds of Secondary Alcohols to Produce Acids. *Angew. Chem., Int. Ed.* **2019**, *58*, 17393-17398.
37. Piera, J.; Bäckvall, J.-E., Catalytic Oxidation of Organic Substrates by Molecular Oxygen and Hydrogen Peroxide by Multistep Electron Transfer—A Biomimetic Approach. *Angew. Chem., Int. Ed.* **2008**, *47*, 3506-3523.
38. Whitfield, S. R.; Sanford, M. S., Reactivity of Pd(II) Complexes with Electrophilic Chlorinating Reagents: Isolation of Pd(IV) Products and Observation of C-Cl Bond-Forming Reductive Elimination. *J. Am. Chem. Soc.* **2007**, *129*, 15142-15143.
39. Song, B.; Zheng, X.; Mo, J.; Xu, B., Palladium-Catalyzed Monoselective Halogenation of C-H Bonds: Efficient Access to Halogenated Arylpyrimidines using Calcium Halides. *Adv. Synth. Catal.* **2010**, *352*, 329-335.

40. Phan, N. T. S.; Van Der Sluys, M.; Jones, C. W., On the Nature of the Active Species in Palladium Catalyzed Mizoroki–Heck and Suzuki–Miyaura Couplings – Homogeneous or Heterogeneous Catalysis, A Critical Review. *Adv. Synth. Catal.* **2006**, *348*, 609-679.
41. Chernyshev, V. M.; Astakhov, A. V.; Chikunov, I. E.; Tyurin, R. V.; Eremin, D. B.; Ranny, G. S.; Khrustalev, V. N.; Ananikov, V. P., Pd and Pt Catalyst Poisoning in the Study of Reaction Mechanisms: What Does the Mercury Test Mean for Catalysis? *ACS Catal.* **2019**, *9*, 2984-2995.
42. Ji, Y.; Jain, S.; Davis, R. J., Investigation of Pd Leaching from Supported Pd Catalysts during the Heck Reaction. *J. Phys. Chem. B* **2005**, *109*, 17232-17238.
43. Chen, X.; Hao, X.-S.; Goodhue, C. E.; Yu, J.-Q., Cu(II)-Catalyzed Functionalizations of Aryl C–H Bonds Using O<sub>2</sub> as an Oxidant. *J. Am. Chem. Soc.* **2006**, *128*, 6790-6791.
44. Yang, L.; Lu, Z.; Stahl, S. S., Regioselective copper-catalyzed chlorination and bromination of arenes with O<sub>2</sub> as the oxidant. *Chem. Commun.* **2009**, 6460-6462.
45. Wang, W.; Pan, C.; Chen, F.; Cheng, J., Copper(ii)-catalyzed ortho-functionalization of 2-arylpyridines with acyl chlorides. *Chem. Commun.* **2011**, *47*, 3978-3980.
46. Pye, D. R.; Mankad, N. P., Bimetallic catalysis for C–C and C–X coupling reactions. *Chem. Sci.* **2017**, *8*, 1705-1718.
47. Kim, U. B.; Jung, D. J.; Jeon, H. J.; Rathwell, K.; Lee, S.-g., Synergistic Dual Transition Metal Catalysis. *Chem. Rev.* **2020**, *120*, 13382-13433.
48. Kakiuchi, F.; Kochi, T.; Mutsutani, H.; Kobayashi, N.; Urano, S.; Sato, M.; Nishiyama, S.; Tanabe, T., Palladium-Catalyzed Aromatic C–H Halogenation with Hydrogen Halides by Means of Electrochemical Oxidation. *J. Am. Chem. Soc.* **2009**, *131*, 11310-11311.
49. Dick, A. R.; Hull, K. L.; Sanford, M. S., A Highly Selective Catalytic Method for the Oxidative Functionalization of C–H Bonds. *J. Am. Chem. Soc.* **2004**, *126*, 2300-2301.
50. Fagnani, D. E.; Kim, D.; Camarero, S. I.; Alfaro, J. F.; McNeil, A. J., Using waste poly(vinyl chloride) to synthesize chloroarenes by plasticizer-mediated electro(de)chlorination. *Nat. Chem.* **2022**.
51. López Granados, M.; Moreno, J.; Alba-Rubio, A. C.; Iglesias, J.; Martín Alonso, D.; Mariscal, R., Catalytic transfer hydrogenation of maleic acid with stoichiometric amounts of formic acid in aqueous phase: paving the way for more sustainable succinic acid production. *Green Chem.* **2020**, *22*, 1859-1872.
52. Escobar-Hernandez, H. U.; Quan, Y.; Papadaki, M. I.; Wang, Q., Life Cycle Assessment of Metal–Organic Frameworks: Sustainability Study of Zeolitic Imidazolate Framework-67. *ACS Sustain. Chem. Eng.* **2023**, *11*, 4219-4225.
